# Supplementary material for: Quaternary carbon construction through Piancatelli rearrangement: easy access to spirocyclopentenones
Source: Royal Society of Chemistry journal article supplement (doi:10.1039/d2cc00050d), 2022-01-01
Supplement: d2cc00050d1.pdf [file d2cc00050d1.pdf]

## Supplementary Information

# Quaternary Carbon Construction through Piancatelli Rearrangement: Easy Access to Spirocyclopentenones

Pooja R. Solanke,<sup>a,b</sup> Radhika Cinsani,<sup>a,b</sup> Kiranmai Nayani,<sup>a,b</sup> Prathama S. Mainkar<sup>a,b</sup> and Srivari Chandrasekhar<sup>\*,a,b</sup>

<sup>a</sup>*Department of Organic Synthesis and Process Chemistry, CSIR-Indian Institute of Chemical Technology, Hyderabad 500007, Telangana, India*

<sup>b</sup>Academy of Scientific and Innovative Research (AcSIR), Ghaziabad 201002, India

\*E-mail: [srivaric@iict.res.in](mailto:srivaric@iict.res.in)

## Table of Contents

|                                                                                                        |         |
|--------------------------------------------------------------------------------------------------------|---------|
| 1. General Information.....                                                                            | S3      |
| 2. Experimental and Characterization of Compounds.....                                                 | S4-S30  |
| 2.1. Synthesis of Furfuryl Alcohol Substrates <b>1</b> and <b>3</b> .....                              | S4-S8   |
| 2.1.1. General Preparation of Furfuryl Alcohols <b>1</b> and <b>3</b> .....                            | S4      |
| 2.1.2. Experimental and Characterization of Furfuryl Alcohol <b>1a-f</b> , <b>3a-c</b> .....           | S4-S8   |
| 2.2. General Procedure for HydroxySpirocyclopentenones <b>2</b> and <b>4</b> .....                     | S8      |
| 2.3. Experimental and Characterization of Hydroxy Spirocyclopentenones <b>2a-f</b> , <b>4a-c</b> ..... | S8-S13  |
| 2.4. General Procedure for Amino Spirocyclopentenones <b>6</b> .....                                   | S13     |
| 2.5. Experimental and Characterization of Amino Spirocyclopentenones <b>6b-t</b> .....                 | S13-S25 |
| 2.6. General Procedure for Indolyl Spirocyclopentenones <b>8</b> .....                                 | S25     |
| 2.7. Experimental and Characterization of Indolyl Spirocyclopentenones <b>8a-e</b> .....               | S25-S28 |
| 2.8. Gram Scale Synthesis of Hydroxy Spirocyclopentenoneoxindole <b>2b</b> .....                       | S28     |
| 2.9. Product Derivatization.....                                                                       | S29,S30 |
| 3. <sup>1</sup> H, <sup>13</sup> C and <sup>19</sup> F NMR Spectra of Compounds.....                   | S31-S79 |
| 4. Study of Stereoselectivity of Hydroxy Spirocyclopentenoneoxindole <b>2b</b> .....                   | S80-S89 |
| 5. Plausible mechanism for the formation of Spirocyclopentenoneoxindole <b>2b</b> .....                | S90     |
| 6. X-ray Crystallographic Data of Compounds <b>2b</b> , <b>6n</b> and <b>8a</b> .....                  | S91-S93 |
| 7. References.....                                                                                     | S94     |

## 1. General Information

All chemicals have been purchased from commercial sources and were used without further purification unless otherwise noted. All solvents are reagent grade or HPLC grade. The synthetic transformations have been monitored by thin layer chromatography (TLC). TLC was performed on silica gel 60 F<sub>254</sub> plates (glass plates). Concentration under reduced pressure was performed by rotary evaporation below 45 °C. Column chromatography was performed using silica gel (100-200 mesh) packed in glass columns. Yields refer to spectroscopically pure compounds after isolation. <sup>1</sup>H, <sup>13</sup>C and <sup>19</sup>F NMR spectra were recorded in CDCl<sub>3</sub> or DMSO-*d*<sub>6</sub> using 400 or 500 MHz (<sup>1</sup>H), 100 or 125 MHz (<sup>13</sup>C) and 377 MHz (<sup>19</sup>F). Chemical shifts ( $\delta$ -values) are reported in ppm, spectra were calibrated related to solvents' residual proton chemical shifts (CDCl<sub>3</sub>,  $\delta$  = 7.26) or (DMSO-*d*<sub>6</sub>, 2.5) and solvents' residual carbon chemical shifts (CDCl<sub>3</sub>,  $\delta$  = 77.16 ppm) or (DMSO-*d*<sub>6</sub>,  $\delta$  = 49.0), multiplicity is reported as follows: s = singlet, d = doublet, dd = doublet of doublet, t = triplet, ddd= doublet of doublet of doublet, td = triplet of doublet, m = multiplet or unresolved and coupling constant *J* in Hz. Melting points (mp) were determined in open capillaries and are uncorrected. Infrared spectra (IR) were recorded on a 0.1 mm KBr demountable cell. High-resolution mass spectra (HRMS) were obtained by electrospray ionization using a Q-TOF mass spectrometer in positive ion mode (M, M+H or M+Na) as indicated.

## 2. Experimental and Characterization of Compounds

### 2.1. Synthesis of Furfuryl Alcohol Substrates

#### 2.1.1. General Preparation of Furfuryl Alcohols **1** and **3**<sup>1</sup>

To a solution of furan (1.4 mmol, 1.4 equiv) in anhydrous THF (20 mL) at -78 °C was added *n*-BuLi (1.2 mmol, 1.2 equiv). After, the resulting light yellow coloured solution was stirred for 1 h, then corresponding isatin/fluorenone/xanthane/thioxanthane (1.0 mmol, 1.0 equiv) in anhydrous THF (20 mL) was added to the reaction mixture in dropwise and the stirring was continued for 0.5 h to 4 h at the same temperature. The reaction was then quenched by saturated aqueous NH<sub>4</sub>Cl (10 mL) and was allowed to warm to room temperature. The reaction mixture was extracted with EtOAc (2 x 50 mL), and the organic layer was separated and washed with water (10 mL) followed by brine solution (10 mL). The organic layer was dried over anhydrous Na<sub>2</sub>SO<sub>4</sub>, filtered and concentrated in vacuo. The crude product was purified by chromatography on silica gel to afford the furfuryl alcohols **1a-f** and **3a-c**.

#### 2.1.2. Experimental and Characterization of Furfuryl Alcohols **1a-f** and **3a-c**

##### 3-(Furan-2-yl)-3-hydroxy-1-methylindolin-2-one (**1a**)

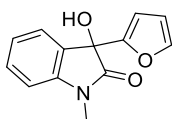

By following the general procedure, the reaction was performed with *N*-methylisatin (500 mg, 3.1 mmol) using furan (0.32 ml, 4.3 mmol) and *n*-BuLi (1.5 mL, 3.7 mmol) in THF at given conditions for 1 h. The residue was purified by silica gel column chromatography (20% EtOAc/hexanes) to afford **1a** (512 mg, 72%) as a white solid. mp 184-185 °C. <sup>1</sup>H NMR (400 MHz, CDCl<sub>3</sub>) δ 7.57 (ddd, *J* = 7.4, 1.2, 0.4 Hz, 1H), 7.43 (t, *J* = 1.3 Hz, 1H), 7.37 (td, *J* = 7.8, 1.3 Hz, 1H), 7.14 (td, *J* = 7.6, 0.9 Hz, 1H), 6.87 (d, *J* = 7.8 Hz, 1H), 6.31 (d, *J* = 1.3 Hz, 2H), 3.78 (s, 1H), 3.22 (s, 3H). <sup>13</sup>C NMR (100 MHz, CDCl<sub>3</sub>) δ 175.2, 151.4, 144.1, 143.6, 130.4, 128.3, 125.5, 123.5, 110.5, 109.1, 108.8, 73.6, 26.6. IR (thin film):  $\nu_{max}/\text{cm}^{-1}$  3386, 3208, 1715, 1616, 1477, 1371, 1099, 1022, 754. HRMS (ESI): *m/z* calculated for [M+H]<sup>+</sup> C<sub>13</sub>H<sub>12</sub>NO<sub>3</sub> 230.0817, found 230.0813.

### 3-(Furan-2-yl)-3-hydroxyindolin-2-one (1b)

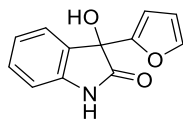

By following the general procedure, the reaction was performed with isatin (500 mg, 3.4 mmol) using furan (0.3 ml, 4.7 mmol) and *n*-BuLi (1.6 mL, 4.1 mmol) in THF at given conditions for 3 h. The residue was purified by silica gel column chromatography (20% EtOAc/hexanes) to afford **1b** (468 mg, 64%) as a white solid. mp 170-172 °C. <sup>1</sup>H NMR (500 MHz, DMSO-*d*<sub>6</sub>) δ 10.45 (s, 1H), 7.59 (dd, *J* = 1.8, 0.9 Hz, 1H), 7.30 (d, *J* = 7.3 Hz, 1H), 7.24 (td, *J* = 7.7, 1.3 Hz, 1H), 6.98 (td, *J* = 7.5, 0.9 Hz, 1H), 6.85 (d, *J* = 7.7 Hz, 1H), 6.73 (s, 1H), 6.40 (dd, *J* = 3.3, 1.8 Hz, 1H), 6.31 (dd, *J* = 3.3, 0.8 Hz, 1H). <sup>13</sup>C NMR (100 MHz, DMSO-*d*<sub>6</sub>) δ 176.2, 153.0, 143.2, 141.7, 130.9, 129.6, 125.0, 121.9, 110.3, 109.9, 107.7, 73.5. IR (thin film):  $\nu_{max}/\text{cm}^{-1}$  3638, 3407, 3378, 3204, 2924, 2859, 1739, 1469, 1214, 1098, 770, 673. HRMS (EI): *m/z* calculated for [M]<sup>+</sup> C<sub>12</sub>H<sub>9</sub>NO<sub>3</sub> 215.0582, found 215.0592.

### 5-Bromo-3-(furan-2-yl)-3-hydroxyindolin-2-one (1c)

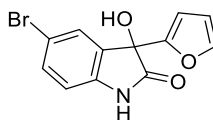

By following the general procedure, the reaction was performed with 5-bromoisatin (400 mg, 1.8 mmol) using furan (1.8 ml, 2.5 mmol) and *n*-BuLi (0.8 mL, 2.1 mmol) in THF at given conditions for 2 h. The residue was purified by silica gel column chromatography (30% EtOAc/hexanes) to afford **1c** (479 mg, 91%) as an off-white solid. mp 219-220 °C. <sup>1</sup>H NMR (400 MHz, DMSO-*d*<sub>6</sub>) δ 11.06 (s, 1H), 8.34 (d, *J* = 2.4 Hz, 1H), 8.23 (d, *J* = 7.8 Hz, 1H), 8.08 (dd, *J* = 8.6, 2.4 Hz, 1H), 7.52 (dd, *J* = 5.9, 1.1 Hz, 1H), 7.16 (dd, *J* = 5.9, 1.3 Hz, 1H), 6.99 (d, *J* = 8.6 Hz, 1H), 6.72 (d, *J* = 7.8 Hz, 1H). <sup>13</sup>C NMR (100 MHz, DMSO-*d*<sub>6</sub>) δ 175.7, 152.2, 143.5, 141.0, 133.1, 132.3, 127.7, 113.5, 112.1, 110.5, 108.1, 73.4. IR (thin film):  $\nu_{max}/\text{cm}^{-1}$  3401, 3293, 2928, 1728, 1472, 1071, 745, 627. HRMS (ESI): *m/z* calculated for [M+Na]<sup>+</sup> C<sub>12</sub>H<sub>8</sub>NNaBrO<sub>3</sub> 315.9585, found 315.9584.

### 4-Bromo-3-(furan-2-yl)-3-hydroxyindolin-2-one (1d)

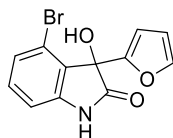

By following the general procedure, the reaction was performed with 4-bromoisatin (400 mg, 1.8mmol) using furan (1.8 ml, 2.5 mmol) and *n*-BuLi (0.8 mL, 2.1 mmol) in THF at given conditions for 4 h. The residue was purified by silica gel column chromatography (30% EtOAc/hexanes) to afford **1d** (452 mg, 86%) as a peach solid. mp 206°C. <sup>1</sup>H NMR (400 MHz, DMSO-*d*6) δ 10.67 (s, 1H), 7.51 (d, *J* = 0.8 Hz, 1H), 7.21 (dd, *J* = 11.1, 4.7 Hz, 1H), 7.12 – 7.08 (m, 1H), 6.88 (d, *J* = 7.1 Hz, 1H), 6.81 (s, 1H), 6.46 (ddd, *J* = 5.0, 3.2, 1.3 Hz, 2H). <sup>13</sup>C NMR (100 MHz, DMSO-*d*6) δ 175.7, 151.3, 144.2, 142.5, 131.7, 129.0, 125.9, 119.6, 110.5, 109.4, 108.5, 75.9. IR (thin film):  $\nu_{max}/cm^{-1}$  3410, 3291, 2900, 1680, 1470, 1050, 740, 630. HRMS (ESI): *m/z* calculated for [M]<sup>+</sup> C<sub>12</sub>H<sub>8</sub>BrNO<sub>3</sub> 292.9688, found 292.9685.

### 3-(Furan-2-yl)-3-hydroxy-5-methylindolin-2-one (**1e**)

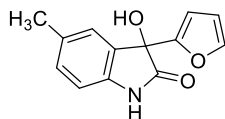

By following the general procedure, the reaction was performed with 5-methylisatin (450 mg, 2.7mmol) using furan (0.3 ml, 3.8 mmol) and *n*-BuLi (1.5 mL, 3.9 mmol) in THF at given conditions for 2.5 h. The residue was purified by silica gel column chromatography (15% EtOAc/hexanes) to afford **1e** (482 mg, 75%) as a pale-yellow solid. mp 201-203 °C. <sup>1</sup>H NMR (400 MHz, DMSO-*d*6) δ 10.36 (s, 1H), 7.58 (s, 1H), 7.11 (s, 1H), 7.05 (d, *J* = 7.8 Hz, 1H), 6.74 (d, *J* = 7.8 Hz, 1H), 6.70 (s, 1H), 6.40 (dd, *J* = 3.0, 1.8 Hz, 1H), 6.32 (d, *J* = 3.0 Hz, 1H), 2.24 (s, 3H). <sup>13</sup>C NMR (100 MHz, DMSO-*d*6) δ 176.3, 153.2, 143.2, 139.3, 130.9, 130.8, 129.8, 125.6, 110.3, 109.7, 107.6, 73.7, 20.6. IR (thin film):  $\nu_{max}/cm^{-1}$  3510, 3022, 2218, 1707, 1215, 749, 671. HRMS (ESI): *m/z* calculated for [M+H]<sup>+</sup> C<sub>13</sub>H<sub>11</sub>NO<sub>3</sub> 230.20, found 230.0813.

### 4,7-Dichloro-3-(furan-2-yl)-3-hydroxyindolin-2-one (**1f**)

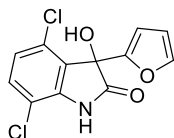

By following the general procedure, the reaction was performed with 4,7-dichloroisatin (450 mg, 2.1mmol) using furan (0.2 ml, 2.9 mmol) and *n*-BuLi (1.0 mL, 2.5 mmol) in THF at given conditions for 2 h. The residue was purified by silica gel column chromatography (30% EtOAc/hexanes) to afford **1f** (460 mg, 78%) as an off-white solid. mp 196 °C. <sup>1</sup>H NMR (400 MHz,

DMSO-*d*<sub>6</sub>)  $\delta$  11.14 (s, 1H), 7.54 (dd,  $J = 1.7, 0.9$  Hz, 1H), 7.39 (d,  $J = 8.7$  Hz, 1H), 7.00 (t,  $J = 4.4$  Hz, 2H), 6.50 (dd,  $J = 3.3, 0.8$  Hz, 1H), 6.44 (dd,  $J = 3.3, 1.8$  Hz, 1H). <sup>13</sup>C NMR (100 MHz, DMSO-*d*<sub>6</sub>)  $\delta$  175.8, 150.9, 143.1, 141.7, 131.3, 129.8, 128.8, 124.3, 113.4, 110.7, 108.7, 75.7. IR (thin film):  $\nu_{max}/cm^{-1}$  3280, 2470, 1735, 1618, 1470, 1162, 810, 751. HRMS (ESI):  $m/z$  calculated for [M+Na]<sup>+</sup> C<sub>12</sub>H<sub>7</sub>Cl<sub>2</sub>NNaO<sub>3</sub> 305.9700, found 305.0357.

### 9-(Furan-2-yl)-9H-fluoren-9-ol (3a)

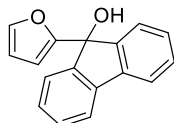

By following the general procedure, the reaction was performed with fluorenone (450 mg, 2.5 mmol) using furan (0.4 ml, 3.5 mmol) and *n*-BuLi (1.0 mL, 3 mmol) in THF at given conditions for 0.5 h. The residue was purified by silica gel column chromatography (12% EtOAc/hexanes) to afford **3a** (539 mg, 87%) as an off-white solid. mp 108 °C. <sup>1</sup>H NMR (500 MHz, CDCl<sub>3</sub>)  $\delta$  7.71 (d,  $J = 7.5$  Hz, 2H), 7.66 (d,  $J = 7.5$  Hz, 2H), 7.43 (dd,  $J = 1.7, 0.8$  Hz, 1H), 7.41 (td,  $J = 7.5, 1.1$  Hz, 2H), 6.28 – 6.25 (m, 2H), 6.12 (dd,  $J = 3.3, 0.7$  Hz, 2H), 2.73 (s, 1H). <sup>13</sup>C NMR (100 MHz, CDCl<sub>3</sub>)  $\delta$  204.6, 163.3, 144.8, 142.6, 142.0, 141.4, 136.0, 128.7, 128.6, 128.0, 127.4, 125.4, 122.9, 120.8, 120.5, 77.8, 69.3. IR (thin film):  $\nu_{max}/cm^{-1}$  3478, 3340, 2820, 1609, 1462, 1312, 1249, 1009, 880, 756. HRMS (ESI):  $m/z$  calculated for [M]<sup>+</sup> C<sub>17</sub>H<sub>12</sub>O<sub>2</sub> 248.0837, found 248.0836.

### 9-(Furan-2-yl)-9H-xanthen-9-ol (3b)

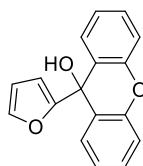

By following the general procedure, the reaction was performed with xanthone (500 mg, 2.5 mmol) using furan (0.27 ml, 3.6 mmol) and *n*-BuLi (1.2 mL, 3.1 mmol) in THF at given conditions for 0.5 h. The residue was purified by silica gel column chromatography (15% EtOAc/hexanes) to afford **3b** (579 mg, 86%) as an off-white solid. mp 91 °C. <sup>1</sup>H NMR (400 MHz, CDCl<sub>3</sub>)  $\delta$  7.60 (d,  $J = 1.6$  Hz, 1H), 7.58 (d,  $J = 1.6$  Hz, 1H), 7.36 (ddd,  $J = 8.6, 7.2, 1.6$  Hz, 2H), 7.30 (dd,  $J = 1.8, 0.9$  Hz, 1H), 7.21 (d,  $J = 1.1$  Hz, 1H), 7.19 (d,  $J = 1.1$  Hz, 1H), 7.18 – 7.13 (m, 2H), 6.31 (dd,  $J = 3.3, 1.8$  Hz, 1H), 6.25 (dd,  $J = 3.2, 0.8$  Hz, 1H), 2.82 (s, 1H). <sup>13</sup>C NMR (100 MHz, CDCl<sub>3</sub>)  $\delta$  157.6,

150.1, 142.9, 129.8, 128.5, 124.3, 123.6, 116.7, 110.2, 107.5, 68.0. IR (thin film):  $\nu_{max}/\text{cm}^{-1}$  3473, 2930, 2430, 1739, 1611, 1483, 1310, 1250, 1110, 808, 759. HRMS (EI):  $m/z$  calculated for  $[\text{M}]^+$   $\text{C}_{17}\text{H}_{12}\text{O}_3$  264.0786, found 264.0790.

### 9-(Furan-2-yl)-9H-thioxanthen-9-ol (3c)

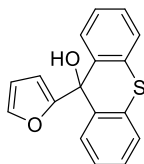

By following the general procedure, the reaction was performed with thioxanthone (500 mg, 2.4 mmol) using furan (0.25 mL, 3.3 mmol) and *n*-BuLi (1.1 mL, 2.8 mmol) in THF at given conditions for 0.5 h. The residue was purified by silica gel column chromatography (15% EtOAc/hexanes) to afford **3c** (528 mg, 89%) as an off-white solid. mp 117 °C.  $^1\text{H}$  NMR (400 MHz,  $\text{CDCl}_3$ )  $\delta$  8.00 (dd,  $J = 7.8, 1.3$  Hz, 2H), 7.46 – 7.35 (m, 4H), 7.33 – 7.25 (m, 3H), 6.18 (dd,  $J = 3.3, 1.8$  Hz, 1H), 5.70 (dd,  $J = 3.3, 0.8$  Hz, 1H), 3.08 (s, 1H).  $^{13}\text{C}$  NMR (100 MHz,  $\text{CDCl}_3$ )  $\delta$  154.2, 143.5, 137.9, 131.7, 128.2, 127.0, 126.9, 126.5, 110.5, 109.6, 73.4. IR (thin film):  $\nu_{max}/\text{cm}^{-1}$  3518, 3409, 1455, 1191, 1150, 1027, 751. HRMS (ESI):  $m/z$  calculated for  $[\text{M}]^+$   $\text{C}_{17}\text{H}_{12}\text{O}_2\text{S}$  280.0558, found 280.0559.

## 2.2. General Procedure for Hydroxy Spirocyclopentenones 2 and 4

To a solution of furfuryl alcohol **1a-f/3a-c** (1.0 equiv) in HFIP/ $\text{H}_2\text{O}$  (2:1), was added *R*-(-)-1,1'-binaphthyl-2,2'-diyl hydrogenphosphate, (*R*)-BINOL.PA (2.5 mol%). Then the reaction mixture was stirred at 90 °C temperature for 0.5-1.0 h (the reaction was monitored by TLC). Upon completion, the solvent was removed under vacuum and the residue was purified by silica gel column chromatography using hexanes/EtOAc to obtain spirocyclopentenone derivatives **2a-f** and **4a-c**.

## 2.3. Experimental and Characterization of Hydroxy Spirocyclopentenones 2a-2f

### 2-Hydroxy-1'-methylspiro[cyclopentane-1,3'-indolin]-3-ene-2',5-dione (2a)

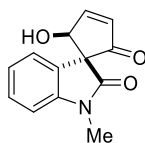



By following the general procedure, the reaction was performed with 3-(furan-2-yl)-3-hydroxy-1-methylindolin-2-one **1a** (100 mg, 0.43mmol, 1.0 equiv) and (*R*)-BINOL.PA (3.8 mg, 2.5 mol%) for 1 h, the product **2a** (62 mg, 62%) was isolated as white solid after silica gel column chromatography (hexanes/EtOAc 6:4). mp 104 °C. <sup>1</sup>H NMR (400 MHz, DMSO-*d*<sub>6</sub>) δ 8.08 (dd, *J* = 5.5, 1.3 Hz, 1H), 7.37 – 7.28 (m, 1H), 7.06 (d, *J* = 7.9 Hz, 1H), 7.01 (d, *J* = 5.5 Hz, 2H), 6.51 (d, *J* = 5.6 Hz, 1H), 5.85 (d, *J* = 6.3 Hz, 1H), 5.06 (d, *J* = 6.2 Hz, 1H), 3.16 (s, 3H). <sup>13</sup>C NMR (125 MHz, DMSO-*d*<sub>6</sub>) δ 201.8, 174.1, 168.4, 145.5, 133.5, 128.9, 126.3, 125.6, 122.4, 109.2, 75.3, 67.5, 26.8. IR (thin film):  $\nu_{max}/\text{cm}^{-1}$  3557, 3479, 3399, 1710, 1612, 1481, 1369, 1124, 761. HRMS (ESI): *m/z* calculated for [M+H]<sup>+</sup> C<sub>13</sub>H<sub>12</sub>NO<sub>3</sub> 230.0817, found 230.0811.

### 3-(*tert*-Butoxy)-3-(furan-2-yl)-1-methylindolin-2-one (**2a'**)

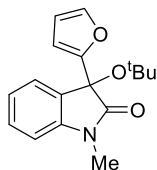

To a solution of furfuryl alcohol **1a** (100 mg, 0.43mol, 1.0 equiv) in *t*BuOH/water (7:3, 1.0 mL), was added B(C<sub>6</sub>F<sub>5</sub>)<sub>3</sub> (5 mol%). Then the reaction mixture was stirred at 90°C temperature for 3 h (the reaction was monitored by TLC). Upon completion, the crude product extracted with ethyl acetate (2 x 10 mL). The combined organic layer was dried over anhydrous Na<sub>2</sub>SO<sub>4</sub> and filtered. The solvent was removed by rotary evaporation and the residue was purified by silica gel column chromatography using (hexanes/EtOAc 6:4) to obtain product **2a'** (79 mg, 60%). <sup>1</sup>H NMR (400 MHz, CDCl<sub>3</sub>) δ 7.79 (dd, *J* = 5.8, 1.3 Hz, 1H), 7.69 (d, *J* = 7.5 Hz, 1H), 7.19 (td, *J* = 7.7, 1.2 Hz, 1H), 7.02 (td, *J* = 7.6, 1.0 Hz, 1H), 6.81 (d, *J* = 7.7 Hz, 1H), 6.57 (dd, *J* = 5.8, 1.5 Hz, 1H), 6.52 (s, 1H), 3.26 (s, 3H), 1.45 (s, 9H). <sup>13</sup>C NMR (100 MHz, CDCl<sub>3</sub>) δ 168.6, 165.7, 141.3, 139.6, 127.0, 126.8, 122.7, 121.9, 107.5, 105.5, 28.8, 25.9. HRMS (ESI): *m/z* calculated for [M+H]<sup>+</sup> C<sub>17</sub>H<sub>20</sub>NO<sub>3</sub> 286.1443, found 286.1430.

### 2-Hydroxyspiro[cyclopentane-1,3'-indolin]-3-ene-2',5-dione (**2b**)

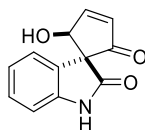

By following the general procedure, the reaction was performed with 3-(furan-2-yl)-3-hydroxyindolin-2-one **1b** (100 mg, 0.46 mmol, 1.0 equiv) and (*R*)-BINOL.PA (4 mg, 2.5 mol%)

for 1 h, the product **2b** (64 mg, 64%) was isolated as pale-yellow powder after silica gel column chromatography (hexanes/EtOAc 6: 4). mp 171 °C. <sup>1</sup>H NMR (400 MHz, DMSO-*d*<sub>6</sub>) δ 10.61 (s, 1H), 8.06 (dd, *J* = 5.6, 2.3 Hz, 1H), 7.20 (dd, *J* = 7.6, 1.5 Hz, 1H), 7.04 – 6.82 (m, 3H), 6.47 (dd, *J* = 5.6, 1.4 Hz, 1H), 5.85 (d, *J* = 6.4 Hz, 1H), 5.03 (ddd, *J* = 6.4, 2.3, 1.5 Hz, 1H). <sup>13</sup>C NMR (125 MHz, DMSO-*d*<sub>6</sub>) δ 213.2, 187.0, 179.4, 155.2, 144.6, 140.0, 138.4, 137.1, 132.8, 121.1, 86.2, 79.1. IR (thin film):  $\nu_{\text{max}}/\text{cm}^{-1}$  3397, 3227, 229, 2928, 1713, 1628, 1470, 1212, 761. HRMS (ESI): *m/z* calculated for [M+H]<sup>+</sup> C<sub>12</sub>H<sub>10</sub>NO<sub>3</sub> 216.0661, found 216.0653.

#### 5'-Bromo-2-hydroxyspiro[cyclopentane-1,3'-indolin]-3-ene-2',5-dione (**2c**)

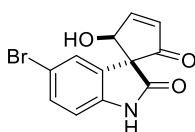

By following the general procedure, the reaction was performed with 5-bromo-3-(furan-2-yl)-3-hydroxyindolin-2-one **1c** (100 mg, 0.34 mmol, 1.0 equiv) and (*R*)-BINOL.PA (4 mg, 2.5 mol%) for 1 h, the product **2c** (55 mg, 55%) was isolated as pale-yellow solid after silica gel column chromatography (hexanes/EtOAc 7:3). mp 220 °C. <sup>1</sup>H NMR (400 MHz, DMSO-*d*<sub>6</sub>) δ (*dr* 5.5:1) 10.77 (s, 1H), 8.08 (dd, *J* = 5.6, 2.4 Hz, 1H), 7.42 (dd, *J* = 8.3, 2.1 Hz, 1H), 7.11 (d, *J* = 2.0 Hz, 1H), 6.86 (d, *J* = 8.3 Hz, 1H), 6.50 (dd, *J* = 5.6, 1.4 Hz, 1H), 5.95 (d, *J* = 6.6 Hz, 1H), 5.02 (ddd, *J* = 6.6, 2.3, 1.5 Hz, 1H). <sup>13</sup>C NMR (100 MHz, DMSO-*d*<sub>6</sub>) δ 200.9, 174.8, 167.9, 143.1, 133.1, 131.1, 128.0, 128.2, 112.9, 111.5, 74.7, 67.5. IR (thin film):  $\nu_{\text{max}}/\text{cm}^{-1}$  3411, 3372, 1703, 1605, 1452, 1309, 1149, 1129, 765. HRMS (EI): *m/z* calculated for [M+H]<sup>+</sup> C<sub>12</sub>H<sub>9</sub>BrNO<sub>3</sub> 293.9766, found 292.9774.

#### 4'-Bromo-2-hydroxyspiro[cyclopentane-1,3'-indolin]-3-ene-2',5-dione (**2d**)

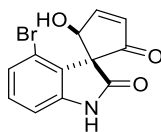

By following the general procedure, the reaction was performed with 4-bromo-3-(furan-2-yl)-3-hydroxyindolin-2-one **1d** (100 mg, 0.34mmol, 1.0 equiv) and (*R*)-BINOL.PA (4 mg, 2.5 mol%) for 30 min, the product **2d** (80 mg, 80%) was isolated as white solid after silica gel column chromatography (hexanes/EtOAc 7:3). mp 197 °C. <sup>1</sup>H NMR (400 MHz, DMSO-*d*<sub>6</sub>) δ 10.72 (s, 1H), 7.93 (dd, *J* = 5.7, 1.9 Hz, 1H), 7.33 – 7.05 (m, 2H), 6.87 (dd, *J* = 7.6, 0.8 Hz, 1H), 6.53 (dd,

$J = 5.7, 1.7$  Hz, 1H), 6.12 (d,  $J = 6.9$  Hz, 1H), 5.45 (dt,  $J = 6.9, 1.8$  Hz, 1H).  $^{13}\text{C}$  NMR (100 MHz, DMSO- $d_6$ )  $\delta$  198.3, 170.6, 166.1, 145.6, 134.1, 131.0, 127.3, 124.8, 118.0, 108.8, 74.8, 70.4. IR (thin film):  $\nu_{\text{max}}/\text{cm}^{-1}$  3405, 3381, 1713, 1617, 1454, 1303, 1153, 1127, 769. HRMS (EI):  $m/z$  calculated for  $[\text{M}]^+ \text{C}_{12}\text{H}_8 \text{BrNO}_3$  292.9688, found 292.9679.

### 2-Hydroxy-5'-methylspiro[cyclopentane-1,3'-indolin]-3-ene-2',5-dione (2e)

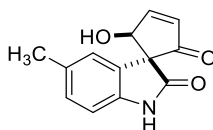

By following the general procedure, the reaction was performed with 3-(furan-2-yl)-3-hydroxy-5-methylindolin-2-one **1e** (100 mg, 0.43 mmol, 1.0 equiv) and (*R*)-BINOL.PA (4 mg, 2.5 mol%) for 45 min, the product **2e** (64 mg, 64%) was isolated as pale-yellow powder after silica gel column chromatography (hexanes/EtOAc 7:3). mp 186 °C.  $^1\text{H}$  NMR (400 MHz, DMSO- $d_6$ )  $\delta$  (*dr* 1.5:1) 10.50 (s, 1H), 8.05 (dd,  $J = 5.6, 2.3$  Hz, 1H), 7.02 (d,  $J = 7.9$  Hz, 1H), 6.79 (s, 1H), 6.76 (d,  $J = 7.9$  Hz, 1H), 6.46 (dd,  $J = 5.6, 1.4$  Hz, 1H), 5.82 (d,  $J = 6.4$  Hz, 1H), 5.02 (dt, 1H), 2.21 (s, 3H).  $^{13}\text{C}$  NMR (100 MHz, DMSO- $d_6$ )  $\delta$  (minor diastereomer peak in parenthesis) 201.6(200.6), 175.3(171.7), 167.8(167.0), 141.2(141.0), 133.0(132.9), 129.9(130.6), 128.5(128.8), 126.1(126.9), 124.3, 109.3(108.9), 74.7(78.1), 67.6(69.4), 20.7. HRMS (ESI):  $m/z$  calculated for  $[\text{M}+\text{H}]^+ \text{C}_{13}\text{H}_{12}\text{NO}_3$  230.0817, found 230.0813.

### 4',7'-Dichloro-2-hydroxyspiro[cyclopentane-1,3'-indolin]-3-ene-2',5-dione (2f)

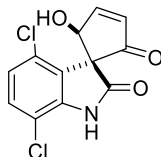

By following the general procedure, the reaction was performed with 4,7-dichloro-3-(furan-2-yl)-3-hydroxyindolin-2-one **1f** (100 mg, 0.35 mmol, 1.0 equiv) and (*R*)-BINOL.PA (4 mg, 2.5 mol%) for 45 min, the product **2f** (85 mg, 85%) was isolated as olive green powder after silica gel column chromatography (hexanes/EtOAc 7:3). mp 228 °C.  $^1\text{H}$  NMR (500 MHz, DMSO- $d_6$ )  $\delta$  11.22 (s, 1H), 7.97 (dd,  $J = 5.7, 1.9$  Hz, 1H), 7.40 (d,  $J = 8.8$  Hz, 1H), 7.08 (d,  $J = 8.8$  Hz, 1H), 6.56 (dd,  $J = 5.7, 1.6$  Hz, 1H), 6.22 (d,  $J = 6.7$  Hz, 1H), 5.42 (dt,  $J = 6.7, 1.8$  Hz, 1H).  $^{13}\text{C}$  NMR (100 MHz, DMSO- $d_6$ )  $\delta$  197.7, 170.5, 166.5, 143.0, 133.8, 130.6, 127.5, 126.7, 123.0, 112.7, 75.0, 70.4. IR

(thin film):  $\nu_{\max}/\text{cm}^{-1}$  3532, 3307, 3185, 1720, 1624, 1495, 1154, 1182, 851, 767. HRMS (EI):  $m/z$  calculated for  $[\text{M}]^+ \text{C}_{12}\text{H}_7\text{Cl}_2\text{NO}_3$  282.9803, found 282.9812.

### 2-Hydroxyspiro[cyclopentane-1,9'-fluoren]-3-en-5-one (4a)

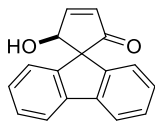

By following the general procedure, the reaction was performed with 9-(furan-2-yl)-9*H*-fluoren-9-ol **3a** (100 mg, 0.4 mmol, 1.0 equiv) and (*R*)-BINOL.PA (3.5 mg, 2.5 mol%) for 30 min, the product **4a** (80 mg, 80%) was isolated as off-white sticky solid after silica gel column chromatography (hexanes/EtOAc 8:2).  $^1\text{H}$  NMR (500 MHz,  $\text{CDCl}_3$ )  $\delta$  7.86 (dd,  $J = 5.8, 2.2$  Hz, 1H), 7.78 – 7.70 (m, 2H), 7.40 (ddd,  $J = 7.3, 4.1, 1.1$  Hz, 2H), 7.26 (dt,  $J = 6.6, 1.8$  Hz, 3H), 7.16 (d,  $J = 7.6$  Hz, 1H), 6.57 (dd,  $J = 5.8, 1.3$  Hz, 1H), 5.21 (s, 1H), 2.12 (dd,  $J = 2.4, 1.6$  Hz, 1H).  $^{13}\text{C}$  NMR (100 MHz,  $\text{CDCl}_3$ )  $\delta$  204.6, 163.3, 144.8, 142.6, 141.9, 141.4, 136.0, 128.7, 128.6, 128.0, 127.4, 125.4, 122.9, 120.8, 120.5, 77.8, 69.3. IR (thin film):  $\nu_{\max}/\text{cm}^{-1}$  3478, 3340, 2820, 1609, 1462, 1312, 1249, 1009, 880, 756. HRMS (ESI):  $m/z$  calculated for  $[\text{M}+\text{H}]^+ \text{C}_{17}\text{H}_{13}\text{O}_2$  249.0916, found 248.0919.

### 2-Hydroxyspiro[cyclopentane-1,9'-xanthen]-3-en-5-one (4b)

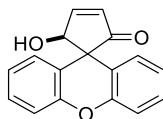

By following the general procedure, the reaction was performed with 9-(furan-2-yl)-9*H*-xanthen-9-ol **3b** (100 mg, 0.38 mmol, 1.0 equiv) and (*R*)-BINOL.PA (3.3 mg, 2.5 mol%) for 30 min, the product **4b** (80 mg, 80%) was isolated as white solid after silica gel column chromatography (hexanes/EtOAc 8:2). mp 142 °C.  $^1\text{H}$  NMR (500 MHz,  $\text{CDCl}_3$ )  $\delta$  7.83 (dd,  $J = 6.0, 2.2$  Hz, 1H), 7.33 – 7.26 (m, 2H), 7.18 (dd,  $J = 8.3, 1.2$  Hz, 1H), 7.14 (dd,  $J = 8.2, 1.2$  Hz, 1H), 7.08 – 7.03 (m, 2H), 6.91 (dd,  $J = 7.8, 1.5$  Hz, 1H), 6.86 (dd,  $J = 7.8, 1.5$  Hz, 1H), 6.72 (dd,  $J = 6.0, 1.5$  Hz, 1H), 4.83 (d,  $J = 7.0$  Hz, 1H), 1.79 (d,  $J = 7.9$  Hz, 1H).  $^{13}\text{C}$  NMR (100 MHz,  $\text{CDCl}_3$ )  $\delta$  206.7, 164.3, 152.2, 151.3, 136.6, 129.6, 129.0, 128.1, 126.7, 124.1, 123.4, 122.7, 118.1, 117.6, 117.0, 84.2, 56.5. IR (thin film):  $\nu_{\max}/\text{cm}^{-1}$  3766, 3475, 3421, 2924, 1715, 1498, 1451, 1309, 1257, 1116, 764. HRMS (EI):  $m/z$  calculated for  $[\text{M}]^+ \text{C}_{17}\text{H}_{12}\text{O}_3$  264.0786, found 264.0791.

## 2-Hydroxyspiro[cyclopentane-1,9'-thioxanthen]-3-en-5-one (4c)

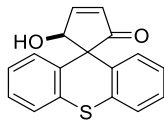

By following the general procedure, the reaction was performed with 9-(furan-2-yl)-9*H*-thioxanthen-9-ol **3c** (100 mg, 0.36 mmol, 1.0 equiv) and (*R*)-BINOL.PA (3.1 mg, 2.5 mol%) for 30 min, the product **4c** (82 mg, 82%) was isolated as light orange powder after silica gel column chromatography (hexanes/EtOAc 8:2). mp 126 °C. <sup>1</sup>H NMR (500 MHz, CDCl<sub>3</sub>) δ 7.81 (dd, *J* = 6.0, 2.2 Hz, 1H), 7.34 – 7.26 (m, 2H), 7.16 (ddd, *J* = 21.3, 8.2, 1.2 Hz, 2H), 7.06 (ddd, *J* = 15.1, 7.7, 1.3 Hz, 2H), 6.90 (dd, *J* = 7.8, 1.5 Hz, 1H), 6.85 (dd, *J* = 7.8, 1.5 Hz, 1H), 6.70 (dd, *J* = 6.0, 1.4 Hz, 1H), 4.81 (d, *J* = 6.7 Hz, 1H), 1.85 (d, *J* = 7.1 Hz, 1H). <sup>13</sup>C NMR (100 MHz, CDCl<sub>3</sub>) δ 206.7, 164.3, 152.2, 151.3, 136.6, 129.6, 129.0, 128.2, 126.7, 124.1, 123.3, 122.7, 118.2, 117.6, 117.0, 84.2, 56.5. IR (thin film)  $\nu_{\text{max}}/\text{cm}^{-1}$  3708, 3479, 1570, 1230, 1198, 1055, 762. HRMS (ED): *m/z* calculated for [M]<sup>+</sup> C<sub>17</sub>H<sub>12</sub>O<sub>2</sub>S 280.0558, found 280.0552.

## 2.4. General Procedure for Amino Spirocyclopentenones 6

To a solution of furfuryl alcohol **3a-c** (100-200 mg, 1.0equiv) and aromatic amines (1.0 equiv) in HFIP (2-4 mL) under nitrogen atmosphere, was added (±)-BINOL.PA (2.5 mol%). Then the reaction mixture was stirred at room temperature for 5-20 min (the reaction was monitored by TLC). Upon completion, the reaction solvent was removed by rotary evaporation and the residue was purified by silica gel column chromatography using hexanes/EtOAc to obtain spiro cyclopentenone derivatives **6b-t**.

## 2.5. Experimental and Characterization of Amino Spirocyclopentenones 6b-t

### 5-(Phenylamino)spiro[cyclopentane-1,9'-thioxanthen]-3-en-2-one (6b)

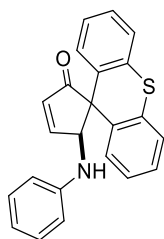

By following the general procedure, the reaction was performed with 9-(furan-2-yl)-9H-thioxanthen-9-ol **3c** (100 mg, 0.36 mmol, 1.0 equiv), aniline (33 mg, 0.35 mmol, 1.0 equiv), ( $\pm$ )-BINOL.PA (3.1 mg, 2.5 mol%) for 5 min, the product **6b** (103 mg, 82%) was isolated as pale-brown powder after silica gel column chromatography (hexanes/EtOAc 7:3).  $R_f = 0.3$  (30% EtOAc in hexanes). mp 151 °C.  $^1\text{H NMR}$  (500 MHz,  $\text{CDCl}_3$ )  $\delta$  7.68 (dd,  $J = 5.8, 2.6$  Hz, 1H), 7.37 – 7.31 (m, 1H), 7.26 – 7.22 (m, 1H), 7.21 – 7.19 (m, 2H), 7.19 – 7.14 (m, 2H), 7.11 – 7.08 (m, 1H), 7.07 – 6.95 (m, 3H), 6.72 – 6.60 (m, 2H), 6.20 (dd,  $J = 8.6, 0.9$  Hz, 2H), 4.72 (d,  $J = 9.0$  Hz, 1H), 2.93 (d,  $J = 9.6$  Hz, 1H).  $^{13}\text{C NMR}$  (100 MHz,  $\text{CDCl}_3$ )  $\delta$  210.0, 163.0, 145.8, 137.4, 135.1, 134.8, 132.7, 132.2, 129.1, 128.6, 127.7, 127.3, 126.9, 126.8, 126.7, 126.3, 118.6, 114.0, 68.1, 62.0. IR (thin film)  $\nu_{\text{max}}/\text{cm}^{-1}$  3399, 3058, 2927, 1713, 1601, 1509, 1258, 756. HRMS (ESI):  $m/z$  calculated for  $[\text{M}+\text{H}]^+$   $\text{C}_{23}\text{H}_{18}\text{NOS}$  356.1124, found 356.1109.

### 5-(*p*-Tolylamino)spiro[cyclopentane-1,9'-thioxanthen]-3-en-2-one (**6c**)

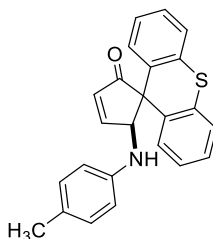

By following the general procedure, the reaction was performed with 9-(furan-2-yl)-9H-thioxanthen-9-ol **3c** (100 mg, 0.36 mmol, 1.0 equiv), *p*-toluidine (38 mg, 0.36 mmol, 1.0 equiv), ( $\pm$ )-BINOL.PA (3.1 mg, 2.5 mol%) for 10 min, the product **6c** (121 mg, 92%) was isolated as shiny gray colour powder after silica gel column chromatography (hexanes/EtOAc 7:3).  $R_f = 0.3$  (30% EtOAc in hexanes). mp 158 °C.  $^1\text{H NMR}$  (400 MHz,  $\text{CDCl}_3$ )  $\delta$  7.68 (dd,  $J = 5.8, 2.5$  Hz, 1H), 7.42 – 7.30 (m, 1H), 7.30 – 7.14 (m, 5H), 7.14 – 7.08 (m, 1H), 7.08 – 6.98 (m, 1H), 6.82 (d,  $J = 8.2$  Hz, 2H), 6.66 (dd,  $J = 5.8, 1.3$  Hz, 1H), 6.12 (d,  $J = 8.4$  Hz, 2H), 4.68 (d,  $J = 8.2$  Hz, 1H), 2.80 (d,  $J = 9.4$  Hz, 1H), 2.20 (d,  $J = 21.1$  Hz, 3H).  $^{13}\text{C NMR}$  (100 MHz,  $\text{CDCl}_3$ )  $\delta$  209.8, 162.9, 143.3, 137.3, 134.6, 132.6, 132.1, 129.3, 128.3, 127.5, 127.4, 126.9, 126.6, 126.5, 126.4, 126.4, 126.1, 113.8, 68.1, 61.7, 20.2. IR (thin film)  $\nu_{\text{max}}/\text{cm}^{-1}$  3395, 3058, 3019, 1713, 1613, 1520, 1473, 1295, 815, 758. HRMS (ESI) :  $m/z$  calculated for  $[\text{M}+\text{H}]^+$   $\text{C}_{24}\text{H}_{20}\text{NOS}$  370.1266, found 370.1284.

## 2-((4-Bromophenyl)amino)spiro[cyclopentane-1,9'-thioxanthen]-3-en-5-one (6d)

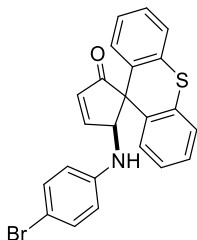

By following the general procedure, the reaction was performed with 9-(furan-2-yl)-9H-thioxanthen-9-ol **3c** (100 mg, 0.37 mmol, 1.0 equiv), 4-bromoaniline (60 mg, 0.37 mmol, 1.0 equiv), ( $\pm$ )-BINOL.PA (3.1 mg, 2.5 mol%) for 5 min, the product **6d** (139 mg, 90%) was isolated as shiny gray colour powder after silica gel column chromatography (hexanes/EtOAc 7:3).  $R_f = 0.3$  (30% EtOAc in hexanes). mp 189 °C.  $^1\text{H NMR}$  (400 MHz,  $\text{CDCl}_3$ )  $\delta$  7.66 (dd,  $J = 5.8, 2.6$  Hz, 1H), 7.41 – 7.29 (m, 1H), 7.25 – 7.15 (m, 5H), 7.11 – 7.08 (m, 3H), 7.06 – 7.00 (m, 1H), 6.70 (dd,  $J = 5.8, 1.5$  Hz, 1H), 6.15 – 6.02 (m, 2H), 4.66 (d,  $J = 9.1$  Hz, 1H), 2.95 (d,  $J = 9.8$  Hz, 1H).  $^{13}\text{C NMR}$  (100 MHz,  $\text{CDCl}_3$ )  $\delta$  209.7, 162.4, 144.9, 137.2, 135.5, 134.8, 132.6, 132.1, 131.8, 128.6, 127.8, 127.4, 126.9, 126.8, 126.5, 115.6, 110.4, 68.1, 62.1. IR (thin film)  $\nu_{\text{max}}/\text{cm}^{-1}$  3791, 3837, 3349, 1716, 1598, 1508, 1071, 764. HRMS (ESI):  $m/z$  calculated for  $[\text{M}+\text{H}]^+$   $\text{C}_{23}\text{H}_{17}\text{BrNOS}$  434.0219, found 434.0214.

## 2-((3-Chlorophenyl)amino)spiro[cyclopentane-1,9'-thioxanthen]-3-en-5-one (6e)

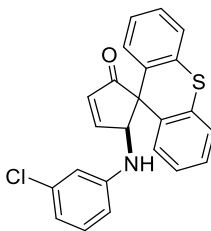

By following the general procedure, the reaction was performed with 9-(furan-2-yl)-9H-thioxanthen-9-ol **3c** (100 mg, 0.37 mmol, 1.0 equiv), 3-chloroaniline (45 mg, 0.37 mmol, 1.0 equiv), ( $\pm$ )-BINOL.PA (3.1 mg, 2.5 mol%) for 5 min, the product **6e** (122 mg, 88%) was isolated as off-white powder after silica gel column chromatography (hexanes/EtOAc 7:3).  $R_f = 0.3$  (30% EtOAc in hexanes). mp 137 °C.  $^1\text{H NMR}$  (500 MHz,  $\text{CDCl}_3$ )  $\delta$  7.69 (dd,  $J = 5.8, 2.5$  Hz, 1H), 7.39 (dd,  $J = 7.6, 1.5$  Hz, 1H), 7.29 – 7.26 (m, 1H), 7.23 (ddd,  $J = 8.9, 6.2, 1.6$  Hz, 4H), 7.15 – 7.09 (m,

1H), 7.07 (dd,  $J = 7.7, 1.4$  Hz, 1H), 6.94 (t,  $J = 8.0$  Hz, 1H), 6.73 (dd,  $J = 5.8, 1.3$  Hz, 1H), 6.66 (dd,  $J = 7.9, 1.1$  Hz, 1H), 6.20 (t,  $J = 2.1$  Hz, 1H), 6.09 (dd,  $J = 8.1, 2.0$  Hz, 1H), 4.70 (dd,  $J = 10.1, 1.6$  Hz, 1H), 3.04 (d,  $J = 10.1$  Hz, 1H).  $^{13}\text{C}$  NMR (100 MHz,  $\text{CDCl}_3$ )  $\delta$  209.6, 162.2, 146.9, 137.1, 135.5, 134.8, 132.4, 132.2, 130.1, 128.6, 127.9, 127.4, 126.9, 126.8, 126.5, 118.6, 113.9, 112.4, 67.9, 62.0. IR (thin film)  $\nu_{\text{max}}/\text{cm}^{-1}$  3979, 3811, 3563, 3379, 1713, 1597, 1512, 769. HRMS (ESI):  $m/z$  calculated for  $[\text{M}+\text{H}]^+$   $\text{C}_{23}\text{H}_{17}\text{ClNOS}$  390.0719, found 390.0738.

### 5-((3-(Trifluoromethyl)phenyl)amino)spiro[cyclopentane-1,9'-thioxanthen]-3-en-2-one (6f)

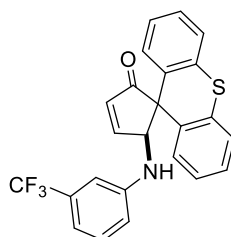

By following the general procedure, the reaction was performed with 9-(furan-2-yl)-9H-thioxanthen-9-ol **3c** (100 mg, 0.37 mmol, 1.0 equiv), 3-(trifluoromethyl)aniline (58 mg, 0.37 mmol, 1.0 equiv), ( $\pm$ )-BINOL.PA (3.1 mg, 2.5 mol%) for 5 min, the product **6f** (121 mg, 80%) was isolated as off-white powder after silica gel column chromatography (hexanes/EtOAc 7:3).  $R_f = 0.3$  (30% EtOAc in hexanes). mp 158 °C.  $^1\text{H}$  NMR (500 MHz,  $\text{CDCl}_3$ )  $\delta$  7.69 (dd,  $J = 5.8, 2.6$  Hz, 1H), 7.35 (dd,  $J = 7.5, 1.5$  Hz, 1H), 7.28 – 7.16 (m, 5H), 7.10 (t,  $J = 6.8$  Hz, 2H), 7.04 (dd,  $J = 7.6, 1.4$  Hz, 1H), 6.91 (d,  $J = 7.6$  Hz, 1H), 6.73 (dd,  $J = 5.8, 1.3$  Hz, 1H), 6.35 (d,  $J = 7.4$  Hz, 2H), 4.77 – 4.70 (m, 1H), 3.14 (d,  $J = 10.4$  Hz, 1H).  $^{13}\text{C}$  NMR (100 MHz,  $\text{CDCl}_3$ )  $\delta$  209.6, 162.1, 146.0, 136.9, 135.8, 134.6, 132.2(q,  $J = 40$  Hz), 129.5, 128.6, 127.9, 127.5, 127.0, 126.8, 126.8, 126.5, 117.3, 115.3 (d,  $J = 4$  Hz), 110.7 (d,  $J = 4$  Hz), 68.1, 62.1.  $^{19}\text{F}$  NMR (377 MHz,  $\text{CDCl}_3$ )  $\delta$  -63.11. IR (thin film)  $\nu_{\text{max}}/\text{cm}^{-1}$  3391, 3064, 1712, 1607, 1481, 1340, 1282, 1166, 1125, 755, 659. HRMS (ESI):  $m/z$  calculated for  $[\text{M}+\text{H}]^+$   $\text{C}_{24}\text{H}_{17}\text{F}_3\text{NOS}$  424.0098, found 424.1001.

### 2-((4-Methoxyphenyl)amino)spiro[cyclopentane-1,9'-fluoren]-3-en-5-one (6g)

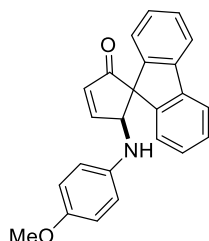



By following the general procedure, the reaction was performed with 9-(furan-2-yl)-9H-fluoren-9-ol **3a** (100 mg, 0.40 mmol, 1.0 equiv), 4-methoxyaniline (50 mg, 0.40 mmol, 1.0 equiv), ( $\pm$ )-BINOL.PA (3.5 mg, 2.5 mol%) for 20 min, the product **6g** (122 mg, 86%) was isolated as off-white powder after silica gel column chromatography (hexanes/EtOAc 7:3).  $R_f = 0.2$  (30% EtOAc in hexanes). mp 122°C.  $^1\text{H NMR}$  (500 MHz,  $\text{CDCl}_3$ )  $\delta$  8.01 (dd,  $J = 5.8, 2.1$  Hz, 1H), 7.70 – 7.64 (m, 2H), 7.41 – 7.32 (m, 4H), 7.24 (ddd,  $J = 7.9, 4.2, 0.8$  Hz, 2H), 6.66 (dd,  $J = 5.8, 1.9$  Hz, 1H), 6.50 – 6.41 (m, 2H), 6.14 – 6.05 (m, 2H), 5.20 (t,  $J = 1.9$  Hz, 1H), 3.62 (s, 3H).  $^{13}\text{C NMR}$  (100 MHz,  $\text{CDCl}_3$ )  $\delta$  205.0, 162.4, 152.4, 145.1, 142.4, 141.7, 141.6, 139.4, 135.4, 128.3, 128.1, 127.8, 127.0, 123.4, 122.4, 120.7, 120.3, 115.0, 114.2, 68.7, 64.1, 55.4. IR (thin film)  $\nu_{\text{max}}/\text{cm}^{-1}$  3394, 3059, 3017, 2832, 1711, 1515, 1241, 1161, 1037, 757. HRMS (ESI):  $m/z$  calculated for  $[\text{M}+\text{H}]^+$   $\text{C}_{24}\text{H}_{20}\text{NO}_2$  354.1494, found 354.1509.

**2-((4-Chlorophenyl)amino)spiro[cyclopentane-1,9'-fluoren]-3-en-5-one (6h)**

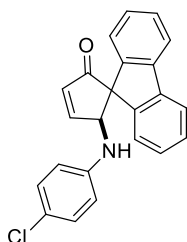

By following the general procedure, the reaction was performed with 9-(furan-2-yl)-9H-fluoren-9-ol **3a** (100 mg, 0.40 mmol, 1.0 equiv), aniline (38 mg, 0.40 mmol, 1.0 equiv), ( $\pm$ )-BINOL.PA (3.5 mg, 2.5 mol%) for 10 min, the product **6h** (123 mg, 82%) was isolated as off-white powder after silica gel column chromatography (hexanes/EtOAc 7:3).  $R_f = 0.3$  (30% EtOAc in hexanes). mp 122 °C.  $^1\text{H NMR}$  (400 MHz,  $\text{CDCl}_3$ )  $\delta$  8.01 – 7.92 (m, 1H), 7.69 (dd,  $J = 7.1, 6.3$  Hz, 2H), 7.42 (ddd,  $J = 7.6, 6.8, 3.8$  Hz, 1H), 7.37 – 7.31 (m, 3H), 7.23 – 7.17 (m, 2H), 6.84 – 6.77 (m, 2H), 6.68 (dd,  $J = 5.8, 1.8$  Hz, 1H), 6.09 – 5.96 (m, 2H), 5.19 (d,  $J = 7.2$  Hz, 1H), 3.90 (d,  $J = 7.0$  Hz, 1H).  $^{13}\text{C NMR}$  (100 MHz,  $\text{CDCl}_3$ )  $\delta$  205.0, 161.9, 145.3, 144.3, 142.7, 141.9, 141.6, 136.1, 129.0, 128.8, 128.6, 128.2, 127.3, 123.9, 123.1, 122.7, 121.1, 120.7, 114.8, 68.7, 63.3. IR (thin film)  $\nu_{\text{max}}/\text{cm}^{-1}$  3388, 3062, 2924, 1709, 1599, 1501, 1445, 1324, 1161, 814, 754. HRMS (ESI):  $m/z$  calculated for  $[\text{M}+\text{H}]^+$   $\text{C}_{23}\text{H}_{17}\text{ClNO}$  358.0999, found 358.1011.

## 2-((4-Bromophenyl)amino)spiro[cyclopentane-1,9'-fluoren]-3-en-5-one (6i)

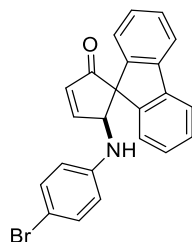

By following the general procedure, the reaction was performed with 9-(furan-2-yl)-9*H*-fluoren-9-ol **3a** (100 mg, 0.40 mmol, 1.0 equiv), 4-bromoaniline (68 mg, 0.40 mmol, 1.0 equiv), ( $\pm$ )-BINOL.PA (3.5 mg, 2.5 mol%) for 10 min, the product **6i** (142 mg, 88%) was isolated as off-white powder after silica gel column chromatography (hexanes/EtOAc 7:3).  $R_f = 0.3$  (30% EtOAc in hexanes). mp 122 °C.  $^1\text{H NMR}$  (400 MHz,  $\text{CDCl}_3$ )  $\delta$  7.93 (dd,  $J = 5.8, 2.2$  Hz, 1H), 7.73 – 7.62 (m, 2H), 7.46 – 7.37 (m, 1H), 7.39 – 7.28 (m, 3H), 7.22 – 7.16 (m, 2H), 6.99 – 6.89 (m, 2H), 6.66 (dd,  $J = 5.8, 1.9$  Hz, 1H), 6.07 – 5.92 (m, 2H), 5.16 (s, 1H), 3.92 (s, 1H).  $^{13}\text{C NMR}$  (100 MHz,  $\text{CDCl}_3$ )  $\delta$  205.3, 162.2, 145.5, 145.1, 143.0, 142.2, 141.9, 136.4, 132.0, 129.1, 129.0, 128.5, 127.6, 124.2, 123.0, 121.4, 121.0, 115.5, 110.4, 69.0, 63.5. IR (thin film)  $\nu_{\text{max}}/\text{cm}^{-1}$  3390, 3060, 3020, 1710, 1594, 1498, 1309, 1161, 754. HRMS (ESI):  $m/z$  calculated for  $[\text{M}+\text{H}]^+$   $\text{C}_{23}\text{H}_{17}\text{BrNO}$  402.0494, found 402.0507.

## 5-((3-(Trifluoromethyl)phenyl)amino)spiro[cyclopentane-1,9'-fluoren]-3-en-2-one (6j)

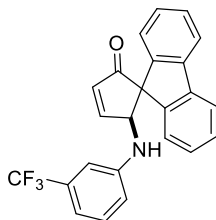

By following the general procedure, the reaction was performed with 9-(furan-2-yl)-9*H*-fluoren-9-ol **3a** (100 mg, 0.40 mmol, 1.0 equiv), 3-(trifluoromethyl)aniline (65 mg, 0.40 mmol, 1.0 equiv), ( $\pm$ )-BINOL.PA (3.5 mg, 2.5 mol%) for 5 min, the product **6j** (140 mg, 89%) was isolated as off-white powder after silica gel column chromatography (hexanes/EtOAc 7:3).  $R_f = 0.3$  (30% EtOAc in hexanes). mp 122°C.  $^1\text{H NMR}$  (500 MHz,  $\text{CDCl}_3$ )  $\delta$  7.94 (dd,  $J = 5.8, 2.2$  Hz, 1H), 7.67 (dd,  $J = 14.9, 7.6$  Hz, 2H), 7.49 – 7.39 (m, 1H), 7.39 – 7.30 (m, 3H), 7.22 – 7.15 (m, 2H), 6.93 (t,  $J = 8.2$  Hz, 1H), 6.76 (d,  $J = 7.7$  Hz, 1H), 6.70 (dd,  $J = 5.8, 2.0$  Hz, 1H), 6.25 (d,  $J = 6.8$  Hz, 2H), 5.32 –

5.19 (m, 1H), 4.13 (d,  $J = 8.9$  Hz, 1H).  $^{13}\text{C}$  NMR (125 MHz,  $\text{CDCl}_3$ )  $\delta$  205.0, 161.6, 146.0, 145.2, 142.7, 141.8, 141.6, 136.3, 131.1 (q,  $J = 31.25$ ), 129.2, 128.7 (d,  $J = 3.75$ ), 128.2, 127.2, 124.1 (q,  $J = 271$  Hz), 123.9, 122.6, 121.0, 116.8, 114.8 (d,  $J = 3.78$  Hz), 110.5 (d,  $J = 3.78$  Hz), 68.6, 63.2.  $^{19}\text{F}$  NMR (377 MHz,  $\text{CDCl}_3$ )  $\delta$  -63.04. IR (thin film)  $\nu_{\text{max}}/\text{cm}^{-1}$  3389, 3062, 1712, 1609, 1489, 1447, 1344, 1165, 1125, 758. HRMS (ESI):  $m/z$  calculated for  $[\text{M}+\text{H}]^+$   $\text{C}_{24}\text{H}_{17}\text{F}_3\text{NO}$  392.1262, found 392.1277.

### 2-((4-Bromophenyl)amino)spiro[cyclopentane-1,9'-xanthen]-3-en-5-one (6k)

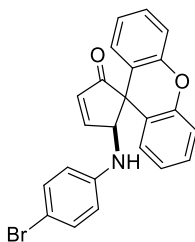

By following the general procedure, the reaction was performed with 9-(furan-2-yl)-9H-xanthen-9-ol **3b** (100 mg, 0.38 mmol, 1.0 equiv), 4-bromo aniline (65 mg, 0.38 mmol, 1.0 equiv), ( $\pm$ )-BINOL.PA (3.3 mg, 2.5 mol%) for 10 min, the product **6k** (147 mg, 93%) was isolated as pale-yellow powder after silica gel column chromatography (hexanes/EtOAc 7:3).  $R_f = 0.3$  (30% EtOAc in hexanes). mp 209.2 °C.  $^1\text{H}$  NMR (400 MHz,  $\text{CDCl}_3$ )  $\delta$  8.15 (dd,  $J = 5.9, 2.4$  Hz, 1H), 7.40 – 7.29 (m, 1H), 7.18 – 7.12 (m, 2H), 7.12 – 7.07 (m, 1H), 6.99 (dd,  $J = 8.0, 1.5$  Hz, 1H), 6.91 (dd,  $J = 7.2, 1.2$  Hz, 1H), 6.90 – 6.84 (m, 3H), 6.82 (dd,  $J = 5.8, 1.9$  Hz, 2H), 6.45 (d,  $J = 8.9$  Hz, 1H), 5.92 (d,  $J = 8.9$  Hz, 2H), 4.67 (dt,  $J = 8.9, 2.2$  Hz, 1H).  $^{13}\text{C}$  NMR (100 MHz,  $\text{DMSO}-d_6$ )  $\delta$  207.7, 166.1, 150.6, 149.8, 145.8, 134.7, 130.8, 129.0, 128.8, 128.5, 126.4, 123.9, 122.1, 118.6, 116.1, 115.4, 113.9, 106.8, 70.6, 54.7. IR (thin film)  $\nu_{\text{max}}/\text{cm}^{-1}$  3392, 3060, 3025, 1710, 1594, 1496, 1312, 1159, 751. HRMS (ESI):  $m/z$  calculated for  $[\text{M}+\text{H}]^+$   $\text{C}_{23}\text{H}_{17}\text{BrNO}_2$  418.0443, found 418.0452.

### 2-((2-Isopropylphenyl)amino)spiro[cyclopentane-1,9'-xanthen]-3-en-5-one (6l)

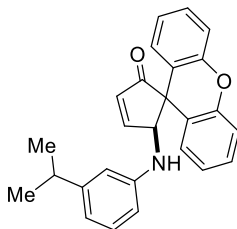

By following the general procedure, the reaction was performed with 9-(furan-2-yl)-9H-xanthen-9-ol **3b** (100 mg, 0.38 mmol, 1.0 equiv), 2-isopropylaniline (51 mg, 0.38 mmol, 1.0 equiv), ( $\pm$ )-

BINOL.PA (3.3 mg, 2.5 mol%) for 5 min, the product **6l** (140 mg, 97%) was isolated as yellow solid after silica gel column chromatography (hexanes/EtOAc 3:2).  $R_f = 0.3$  (50% EtOAc in hexanes). mp 117.5 °C.  $^1\text{H NMR}$  (500 MHz,  $\text{CDCl}_3$ )  $\delta$  7.88 (dd,  $J = 5.9, 2.1$  Hz, 1H), 7.29-7.24 (m, 1H), 7.17-7.05 (m, 2H), 7.02 (d,  $J = 8.2$  Hz, 1H), 6.99-6.92 (m, 2H), 6.84-6.76 (m, 3H), 6.74 (dd,  $J = 5.9, 1.9$  Hz, 1H), 6.48 (d,  $J = 7.6$  Hz, 1H), 5.93 – 5.87 (m, 2H), 4.87 (d,  $J = 6.5$  Hz, 1H), 3.61 (d,  $J = 8.4$  Hz, 1H), 2.58-2.48 (m, 1H), 1.03 (dd,  $J = 6.9, 3.0$  Hz, 6H) ppm.  $^{13}\text{C NMR}$  (100 MHz,  $\text{CDCl}_3$ )  $\delta$  208.2, 164.2, 152.0, 150.9, 149.8, 145.4, 136.4, 129.0, 128.8, 128.7, 126.9, 126.2, 124.0, 123.9, 122.7, 119.0, 117.0, 116.8, 116.8, 111.7, 111.5, 71.3, 55.8, 34.1, 23.8, 23.7 ppm. IR (thin film)  $\nu_{\text{max}}/\text{cm}^{-1}$  3721, 3621, 3401, 3214, 3121, 3014, 2922, 2885, 1709, 771, 648. HRMS (ESI):  $m/z$   $[\text{M}+\text{H}]^+$  calculated for  $\text{C}_{26}\text{H}_{24}\text{NO}_2$  382.1801, found 382.1805.

### 2-((2-Oxospiro[cyclopentane-1,9'-xanthen]-3-en-5-yl)amino)benzonitrile (**6m**)

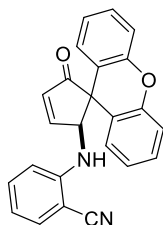

By following the general procedure, the reaction was performed with 9-(furan-2-yl)-9*H*-xanthen-9-ol **3b** (100 mg, 0.38 mmol, 1.0 equiv), 2-aminobenzonitrile (45 mg, 0.38 mmol, 1.0 equiv), ( $\pm$ )-BINOL.PA (3.3 mg, 2.5 mol%) for 10 min, the product **6m** (62 mg, 45% yield) was isolated as brown solid after silica gel column chromatography (hexanes/EtOAc 4:1).  $R_f = 0.3$  (30% EtOAc in hexanes). mp 197.2 °C.  $^1\text{H NMR}$  (400 MHz,  $\text{CDCl}_3$ )  $\delta$  7.89 (dd,  $J = 5.9, 2.4$  Hz, 1H), 7.35 – 7.28 (m, 1H), 7.19 – 7.01 (m, 6H), 6.98 – 6.95 (m, 1H), 6.86 - 6.82 (m, 2H), 6.78 (dd,  $J = 8.2, 1.1$  Hz, 1H), 6.60 (td,  $J = 7.7, 0.6$  Hz, 1H), 6.15 (d,  $J = 8.5$  Hz, 1H), 4.87 (dt,  $J = 10.2, 2.0$  Hz, 1H), 4.51 (d,  $J = 10.2$  Hz, 1H) ppm.  $^{13}\text{C NMR}$  (125 MHz,  $\text{CDCl}_3$ )  $\delta$  207.3, 162.0, 151.6, 150.8, 147.9, 137.6, 133.7, 132.5, 129.4, 129.1, 127.3, 126.1, 124.1, 123.8, 123.6, 118.3, 118.0, 116.9, 116.8, 116.6, 112.0, 96.6, 70.0, 55.4 ppm. IR (thin film)  $\nu_{\text{max}}/\text{cm}^{-1}$  3363, 2217, 1718, 1592, 1516, 1478, 1451, 1313, 1258, 1162, 915, 887, 801, 749. HRMS (ESI):  $m/z$   $[\text{M}+\text{H}]^+$  calculated for  $\text{C}_{24}\text{H}_{17}\text{N}_2\text{O}_2$  365.1284, found 365.1268.

## 2-((3,4-Dimethylphenyl)amino)spiro[cyclopentane-1,9'-xanthen]-3-en-5-one (6n)

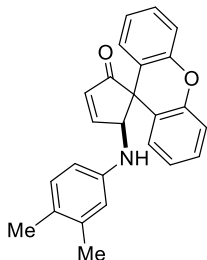

By following the general procedure, the reaction was performed with 9-(furan-2-yl)-9*H*-xanthen-9-ol **3b** (100 mg, 0.38 mmol, 1.0 equiv), 3,4-dimethyl aniline (46 mg, 0.38 mmol, 1.0 equiv), (±)-BINOL.PA (3.3 mg, 2.5 mol%) for 5 min, the product **6n** (133 mg, 96%) was isolated as pale-yellow crystalline solid after silica gel column chromatography (hexanes/EtOAc 7:3).  $R_f = 0.3$  (30% EtOAc in hexanes). mp 209.2 °C.  $^1\text{H NMR}$  (400 MHz,  $\text{CDCl}_3$ )  $\delta$  7.88 (dd,  $J = 5.9, 2.3$  Hz, 1H), 7.29-7.24 (m, 1H), 7.19-7.12 (m, 1H), 7.09 (td,  $J = 7.5, 1.3$  Hz, 1H), 7.05-6.99 (m, 1H), 6.98-6.93 (m, 2H), 6.85-6.78 (m, 2H), 6.73 (dd,  $J = 5.9, 2.1$  Hz, 1H), 6.66 – 6.62 (m, 1H), 5.88 – 5.83 (m, 2H), 4.81 (dt,  $J = 11.1, 2.1$  Hz, 1H), 3.45 (d,  $J = 11.1$  Hz, 1H), 2.05 (s, 3H), 1.94 (s, 3H) ppm.  $^{13}\text{C NMR}$  (100 MHz,  $\text{CDCl}_3$ )  $\delta$  208.2, 164.3, 152.0, 151.1, 143.4, 137.0, 136.2, 129.9, 128.9, 128.6, 126.8, 126.6, 126.3, 124.0, 123.9, 122.7, 119.1, 116.9, 116.7, 115.3, 111.2, 71.4, 55.9, 19.7, 18.7. IR (thin film)  $\nu_{\text{max}}/\text{cm}^{-1}$  3569, 3506, 3409, 3020, 2924, 1720, 1459, 770, 652. HRMS (ESI):  $m/z$   $[\text{M}+\text{H}]^+$  calculated for  $\text{C}_{25}\text{H}_{21}\text{NO}_2$  368.1645, found 368.1642.

## 2-((3,5-Bis(trifluoromethyl)phenyl)amino)spiro[cyclopentane-1,9'-xanthen]-3-en-5-one (6o)

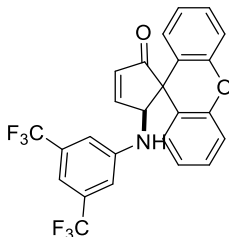

By following the general procedure, the reaction was performed with 9-(furan-2-yl)-9*H*-xanthen-9-ol **3b** (100 mg, 0.38 mmol, 1.0 equiv), 3,5 bis(trifluoromethyl)aniline (86 mg, 0.38 mmol), (±)-BINOL.PA (3.3 mg, 2.5 mol%) for 10 min, the product **6o** (153 mg, 85%) was isolated as brown solid after silica gel column chromatography (hexanes/EtOAc 3:2),.  $R_f = 0.3$  (50% EtOAc in hexanes). mp 219.5 °C.  $^1\text{H NMR}$  (400 MHz,  $\text{CDCl}_3$ )  $\delta$  7.85 (dd,  $J = 5.9, 2.4$  Hz, 1H), 7.33 – 7.28 (m, 1H), 7.15 – 7.09 (m, 2H), 7.09 – 7.03 (m, 2H), 6.99 (td,  $J = 7.6, 1.3$  Hz, 1H), 6.95 – 6.93 (m, 1H), 6.85 (dd,  $J = 5.9, 2.1$  Hz, 1H), 6.74 (ddd,  $J = 11.3, 8.0, 1.4$  Hz, 2H), 6.40 (s, 2H), 4.88 (dt,  $J$

= 11.1, 2.3 Hz, 1H), 3.96 (d,  $J = 11.1$  Hz, 1H) ppm.  $^{13}\text{C}$  NMR (100 MHz,  $\text{CDCl}_3$ )  $\delta$  207.4, 161.9, 151.9, 150.4, 146.5, 137.6, 132.5, 132.05 (q,  $J = 33.0$  Hz), 129.4, 129.2, 126.8, 125.8, 124.2, 123.5, 123.1 (q,  $J = 272.9$  Hz), 123.0, 118.6, 117.2, 116.7, 113.2, 111.9, 71.0, 55.5.  $^{19}\text{F}$  NMR (377 MHz,  $\text{CDCl}_3$ )  $\delta$  -63.45. IR (thin film)  $\nu_{\text{max}}/\text{cm}^{-1}$  3378, 1711, 1621, 1480, 1467, 1394, 1307, 1279, 1175, 1132, 872, 758. HRMS (ESI):  $m/z$   $[\text{M}+\text{H}]^+$  calculated for  $\text{C}_{25}\text{H}_{16}\text{F}_6\text{NO}_2$  476.1087, found 476.1086.

**2-((3-Chloro-4-fluorophenyl)amino)spiro[cyclopentane-1,9'-xanthen]-3-en-5-one (6p)**

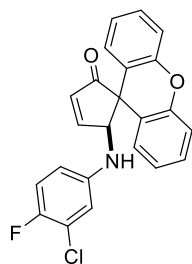

By following the general procedure, the reaction was performed with 9-(furan-2-yl)-9*H*-xanthen-9-ol **3b** (100 mg, 0.38 mmol), 3-chloro-4-fluoroaniline (55 mg, 0.38 mmol), ( $\pm$ )-BINOL.PA (3.3 mg, 2.5 mol%) for 5 min, the product **6p** (144 mg, 98%) was isolated as yellow solid after silica gel column chromatography (hexanes/EtOAc 3:2).  $R_f = 0.3$  (50% EtOAc in hexanes). mp 210 °C.  $^1\text{H}$  NMR (400 MHz,  $\text{CDCl}_3$ )  $\delta$  7.84 (dd,  $J = 5.8, 2.1$  Hz, 1H), 7.33-7.23 (m, 1H), 7.19-7.14 (m, 1H), 7.12-7.03 (m, 2H), 6.99 (t,  $J = 7.1$  Hz, 1H), 6.95-6.89 (m, 1H), 6.84 (d,  $J = 8.2$  Hz, 1H), 6.81-6.73 (m, 2H), 6.65 (t,  $J = 8.8$  Hz, 1H), 6.02 (dd,  $J = 5.9, 2.8$  Hz, 1H), 5.91-5.85 (m, 1H), 4.74 (d,  $J = 11.4$  Hz, 1H), 3.55 (d,  $J = 11.3$  Hz, 1H) ppm.  $^{13}\text{C}$  NMR (100 MHz,  $\text{CDCl}_3$ )  $\delta$  207.7, 163.1, 152.8, 152.1, 150.8, 150.4, 142.3, 137.0, 129.2, 129.0, 126.7, 126.1, 124.1, 123.8, 122.9, 120.9, 120.7, 118.9, 116.9, 116.6, 116.4, 115.1, 113.0 (d,  $J = 6.4$  Hz), 71.6, 55.7.  $^{19}\text{F}$  NMR (377 MHz,  $\text{CDCl}_3$ )  $\delta$  -129.08. IR (thin film)  $\nu_{\text{max}}/\text{cm}^{-1}$  3843, 3794, 3720, 3651, 3408, 2925, 1710, 1510, 1258, 1224, 770, 654. HRMS (ESI):  $m/z$   $[\text{M}+\text{H}]^+$  calculated for  $\text{C}_{23}\text{H}_{16}\text{NO}_2\text{FCl}$  392.0848; found 392.0857.

**2-((2-Iodo-4-methylphenyl)amino)spiro[cyclopentane-1,9'-xanthen]-3-en-5-one (6q)**

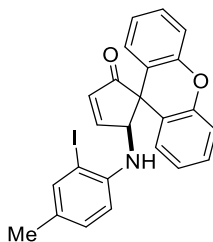

By following the general procedure, the reaction was performed with 9-(furan-2-yl)-9*H*-xanthen-9-ol **3b** (100 mg, 0.38 mmol), 2-iodo-4-methylaniline (88 mg, 0.38 mmol), ( $\pm$ )-BINOL.PA (3.3 mg, 2.5 mol%) for 10 min, the product **6q** (62 mg, 34%) was isolated as white solid after silica gel column chromatography (hexanes/EtOAc 3:2).  $R_f = 0.7$  (30% EtOAc in hexanes). mp 292 °C.  $^1\text{H}$  NMR (500 MHz,  $\text{CDCl}_3$ )  $\delta$  7.92 (dd,  $J = 5.9, 2.2$  Hz, 1H), 7.31 – 7.27 (m, 2H), 7.20 – 7.16 (m, 1H), 7.12 – 7.06 (m, 2H), 7.02 (td,  $J = 7.6, 1.3$  Hz, 1H), 6.98-6.26 (m, 1H), 6.90 (ddd,  $J = 13.0, 8.0, 1.3$  Hz, 2H), 6.80 (dd,  $J = 5.9, 2.0$  Hz, 1H), 6.75 (dd,  $J = 8.3, 1.8$  Hz, 1H), 6.02 (d,  $J = 8.3$  Hz, 1H), 4.79 (dt,  $J = 10.1, 1.8$  Hz, 1H), 4.11 (d,  $J = 10.1$  Hz, 1H), 2.11 (s, 3H) ppm.  $^{13}\text{C}$  NMR (125 MHz,  $\text{CDCl}_3$ )  $\delta$  207.8, 163.3, 151.9, 151.1, 142.4, 139.3, 136.5, 129.6, 129.3, 128.9, 127.2, 126.4, 124.0, 117.0, 116.8, 111.2, 85.3, 70.6, 55.6, 19.8 ppm. IR (thin film)  $\nu_{\text{max}}/\text{cm}^{-1}$  3464, 3248, 2548, 2099, 1728, 1591, 1220, 771. HRMS (ESI):  $m/z$   $[\text{M}+\text{H}]^+$  calculated for  $\text{C}_{24}\text{H}_{19}\text{NO}_2\text{I}$  480.0455, found 480.0470.

**5-((3, 4, 5-Trimethoxyphenyl)amino)spiro[cyclopentane-1,9'-xanthen]-3-en-2-one (6r)**

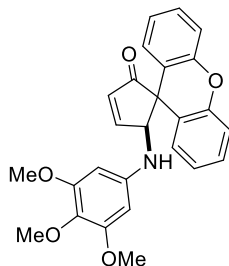

By following the general procedure, the reaction was performed with 9-(furan-2-yl)-9*H*-xanthen-9-ol **3b** (100 mg, 0.38 mmol), 3,4,5-trimethoxyaniline (69 mg, 0.38 mmol), ( $\pm$ )-BINOL.PA (3.3 mg, 2.5 mol%) for 5 min, the product **6r** (153 mg, 95%) was isolated as pale-yellow solid after silica gel column chromatography (hexanes/EtOAc 3:2).  $R_f = 0.3$  (50% EtOAc in hexanes). mp 195 °C.  $^1\text{H}$  NMR (500 MHz,  $\text{CDCl}_3$ )  $\delta$  7.88 (dd,  $J = 5.9, 2.3$  Hz, 1H), 7.24 (dd,  $J = 11.2, 4.2$  Hz, 1H), 7.16 – 7.12 (m, 1H), 7.10 – 7.06 (m, 1H), 7.02 (d,  $J = 8.2$  Hz, 1H), 6.99 – 6.93 (m, 2H), 6.85 – 6.81 (m, 1H), 6.79 (dd,  $J = 7.7, 1.3$  Hz, 1H), 6.75 (dd,  $J = 5.9, 2.1$  Hz, 1H), 5.25 (s, 2H), 4.83 (d,  $J = 9.4$  Hz, 1H), 3.68 (s, 3H), 3.64-3.59 (m, 1H), 3.45 (s, 6H).  $^{13}\text{C}$  NMR (100 MHz,  $\text{CDCl}_3$ )  $\delta$  207.9, 163.9, 153.4, 152.0, 150.8, 142.0, 136.6, 130.9, 129.0, 128.7, 126.9, 126.2, 124.2, 123.9, 122.7, 118.9, 116.8, 116.8, 91.5, 72.2, 61.1, 55.8, 55.0. IR (thin film)  $\nu_{\text{max}}/\text{cm}^{-1}$  3845, 3652, 3514, 3428, 2929, 1714, 1611, 1515, 1452, 1310, 1255, 1131, 765, 658, 633. HRMS (ESI):  $m/z$   $[\text{M}+\text{H}]^+$  calculated for  $\text{C}_{26}\text{H}_{24}\text{NO}_5$  430.1649, found 430.1659.

### 5-(Quinolin-4-ylamino)spiro[cyclopentane-1,9'-xanthen]-3-en-2-one (6s)

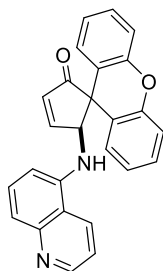

By following the general procedure, the reaction was performed with 9-(furan-2-yl)-9*H*-xanthen-9-ol **3b** (100 mg, 0.38 mmol), 4-amino quinoline (54 mg, 0.38 mmol), (±)-BINOL.PA (3.3 mg, 2.5 mol%) for 15 min, the product **6s** (139 mg, 94% yield) was isolated as brown sticky solid after silica gel column chromatography (hexanes/EtOAc 3:2).  $R_f = 0.3$  (50% EtOAc in hexanes).  $^1\text{H}$  NMR (500 MHz,  $\text{CDCl}_3$ )  $\delta$  8.48 (d,  $J = 2.8$  Hz, 1H), 8.07 (dd,  $J = 5.8, 2.0$  Hz, 1H), 7.90 (d,  $J = 8.1$  Hz, 1H), 7.30 (t,  $J = 7.2$  Hz, 1H), 7.27-7.21 (m, 1H), 7.14 -7.05 (m, 3H), 7.04-7.00 (m, 1H), 6.99-6.96 (m, 1H), 6.91-6.87 (m, 1H), 6.84 (dd,  $J = 5.7, 1.6$  Hz, 1H), 6.75 – 6.71 (m, 2H), 6.53-6.49 (m, 1H), 6.34 (d,  $J = 10.4$  Hz, 1H), 6.20 (d,  $J = 7.5$  Hz, 1H), 5.04 (d,  $J = 10.6$  Hz, 1H).  $^{13}\text{C}$  NMR (100 MHz,  $\text{CDCl}_3$ )  $\delta$  208.4, 164.0, 151.5, 150.9, 146.7, 142.2, 137.8, 136.7, 135.7, 128.8, 128.3, 128.1, 127.6, 126.1, 126.2, 124.4, 123.8, 122.9, 121.2, 118.8, 116.7, 115.7, 107.2, 70.95, 55.7. IR (thin film)  $\nu_{\text{max}}/\text{cm}^{-1}$  3485, 2925, 1716, 1588, 1456, 1220, 771, 683, 643. HRMS (ESI):  $m/z$   $[\text{M}+\text{H}]^+$  calculated for  $\text{C}_{26}\text{H}_{19}\text{N}_2\text{O}_2$  391.1441, found 391.1437.

### 2-(Naphthalen-1-yl(phenyl)amino)spiro[cyclopentane-1,9'-xanthen]-3-en-5-one (6t)

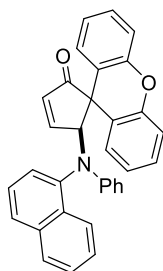

By following the general procedure, the reaction was performed with 9-(furan-2-yl)-9*H*-xanthen-9-ol **3b** (100 mg, 0.38 mmol), *N*-phenylnaphthalen-1-amine (83 mg, 0.38 mmol), (±)-BINOL.PA (3.3 mg, 2.5 mol%) for 15 min, the product **6t** (81 mg, 55%) was isolated as brown semisolid after silica gel column chromatography (hexanes/EtOAc 3:2).  $R_f = 0.3$  (50% EtOAc in hexanes).  $^1\text{H}$  NMR (500 MHz,  $\text{CDCl}_3$ )  $\delta$  8.31 – 8.26 (m, 1H), 7.83 (d,  $J = 8.4$  Hz, 1H), 7.42 – 7.30 (m, 3H), 7.24-7.17 (m, 6H), 7.11 (d,  $J = 8.3$  Hz, 2H), 6.94-6.92 (m 2H), 6.88 (t,  $J = 7.3$  Hz, 2H), 6.74 (d,  $J$



= 8.1 Hz, 2H), 6.56 – 6.44 (m, 2H), 5.76 (s, 1H), 5.10 (s, 1H) ppm.  $^{13}\text{C}$  NMR (100 MHz,  $\text{CDCl}_3$ )  $\delta$  208.4, 164.0, 151.5, 150.9, 146.7, 142.2, 137.8, 136.7, 135.7, 128.8, 128.3, 128.1, 127.6, 126.1, 126.2, 124.4, 123.8, 122.9, 121.2, 118.8, 116.7, 115.7, 107.2, 70.95, 55.7. IR (thin film)  $\nu_{\text{max}}/\text{cm}^{-1}$  3767, 3651, 3518, 3409, 2918, 2357, 1601, 1449, 1305, 1259, 955, 765, 658. HRMS (ESI):  $m/z$   $[\text{M}+\text{H}]^+$  calculated for  $\text{C}_{33}\text{H}_{24}\text{NO}_2$  466.1801, found 466.1807.

## 2.6. General Procedure for Indolyl Spirocyclopentenones **8**

To a solution of furfuryl alcohol **1a,b/3a,c** (100 mg, 1.0 equiv) and substituted indole (1.0 equiv) in HFIP (2-4 mL) under nitrogen atmosphere, was added (*R*)-BINOL.PA (2.5 mol%). Then the reaction mixture was stirred at room temperature for 10-15 min (the reaction was monitored by TLC). Upon completion, the reaction was quenched with water (10 mL) and extracted with ethyl acetate (2 x 10 mL). The combined organic layer was dried over anhydrous  $\text{Na}_2\text{SO}_4$  and filtered. The solvent was removed by rotary evaporation and the residue was purified by silica gel column chromatography using hexanes/EtOAc to obtain spirocyclopentenone derivatives **8a-e**.

## 2.7. Experimental and Characterization of Indolyl Spirocyclopentenones **8a-e**

### 2-(1*H*-Indol-3-yl)spiro[cyclopentane-1,3'-indolin]-3-ene-2',5-dione (**8a**)

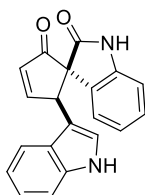

By following the general procedure, the reaction was performed with 3-(furan-2-yl)-3-hydroxyindolin-2-one **1b** (100 mg, 0.46 mmol, 1.0 equiv), indole (54 mg, 0.46 mmol, 1.0 equiv), (*R*)-BINOL.PA (4 mg, 2.5 mol%) for 15 min at 90 °C, the product **8a** (90 mg, 62%) was isolated as light brown colour powder after silica gel column chromatography (hexanes/EtOAc 7:3).  $R_f$  = 0.3 (40% EtOAc in hexanes). mp 231 °C.  $^1\text{H}$  NMR (400 MHz,  $\text{DMSO}-d_6$ )  $\delta$  10.99 (s, 1H), 10.11 (s, 1H), 8.37 (d,  $J$  = 4.1 Hz, 1H), 7.44 (d,  $J$  = 7.3 Hz, 1H), 7.27 (t,  $J$  = 7.1 Hz, 2H), 7.16 – 7.03 (m, 2H), 6.94 (t,  $J$  = 7.5 Hz, 1H), 6.72 (d,  $J$  = 7.6 Hz, 1H), 6.65 (t,  $J$  = 7.4 Hz, 1H), 6.58 – 6.46 (m, 2H), 4.99 (s, 1H).  $^{13}\text{C}$  NMR (100 MHz,  $\text{DMSO}-d_6$ )  $\delta$  203.8, 172.5, 168.6, 143.4, 135.8, 132.2, 129.8, 128.8, 126.6, 124.3, 123.6, 121.8, 120.9, 118.3, 117.7, 111.3, 110.1, 109.3, 67.6, 48.9. IR

(thin film)  $\nu_{\max}/\text{cm}^{-1}$  3758, 3530, 3398, 3249, 3200, 2761, 1710, 1694, 1550, 1209, 740, 656. HRMS (ESI):  $m/z$   $[\text{M}+\text{H}]^+$  calculated for  $\text{C}_{20}\text{H}_{15}\text{N}_2\text{O}_2$  315.1134, found 315.1142.

### 2-(1*H*-Indol-3-yl)-1'-methylspiro[cyclopentane-1,3'-indolin]-3-ene-2',5-dione (**8b**)

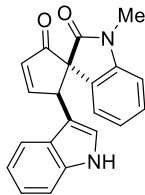

By following the general procedure, the reaction was performed with 3-(furan-2-yl)-3-hydroxy-1-methylindolin-2-one **1a** (100 mg, 0.44 mmol, 1.0 equiv), indole (51 mg, 0.44 mmol, 1.0 equiv), (*R*)-BINOL.PA (3.8 mg, 2.5 mol%) for 15 min at 90 °C, the product **8b** (86 mg, 60%) was isolated as brown colour powder after silica gel column chromatography (hexanes/EtOAc 7:3).  $R_f$  = 0.3 (40% EtOAc in hexanes). mp 162 °C.  $^1\text{H}$  NMR (400 MHz,  $\text{DMSO}-d_6$ )  $\delta$  10.70 (s, 1H), 8.46 (dd,  $J$  = 5.5, 2.3 Hz, 1H), 7.28 (d,  $J$  = 8.2 Hz, 1H), 7.23 (s, 1H), 7.09 (d,  $J$  = 7.9 Hz, 1H), 7.02 (t,  $J$  = 7.4 Hz, 1H), 6.88 (dt,  $J$  = 21.6, 7.5 Hz, 2H), 6.68 (d,  $J$  = 7.7 Hz, 1H), 6.60 (dd,  $J$  = 5.5, 2.3 Hz, 1H), 6.49 (t,  $J$  = 7.5 Hz, 1H), 6.40 (d,  $J$  = 7.2 Hz, 1H), 4.89 (s, 1H), 3.70 (s, 3H).  $^{13}\text{C}$  NMR (100 MHz,  $\text{DMSO}$ )  $\delta$  203.8, 176.2, 169.6, 143.6, 137.0, 132.3, 128.7, 128.4, 128.1, 127.6, 124.5, 121.7, 121.4, 119.3, 118.3, 110.4, 110.2, 109.9, 67.1, 47.4, 32.9. IR (thin film)  $\nu_{\max}/\text{cm}^{-1}$  3781, 3529, 3417, 3246, 3204, 2899, 2330, 1722, 1689, 1556, 1473, 1209, 744, 659. HRMS (ESI):  $m/z$   $[\text{M}]^+$  calculated for  $\text{C}_{21}\text{H}_{17}\text{N}_2\text{O}_2$  329.1290, found 329.1299.

### 2-(1*H*-Indol-3-yl)spiro[cyclopentane-1,9'-thioxanthen]-3-en-5-one (**8c**)

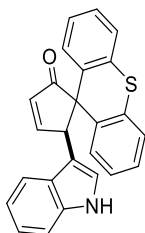

By following the general procedure, the reaction was performed with 9-(furan-2-yl)-9*H*-thioxanthen-9-ol **3c** (100 mg, 0.35 mmol, 1.0 equiv), indole (42 mg, 0.35 mmol, 1.0 equiv), (*R*)-BINOL.PA (3.1 mg, 2.5 mol%) for 10 min at room temperature, the product **8c** (119 mg, 88%) was isolated as shiny gray colour powder after silica gel column chromatography (hexanes/EtOAc 7:3).  $R_f$  = 0.3 (30% EtOAc in hexanes). mp 198 °C.  $^1\text{H}$  NMR (500 MHz,  $\text{CDCl}_3$ )  $\delta$  7.79 (s, 1H),

7.75 (dd,  $J = 5.7, 2.9$  Hz, 1H), 7.48 (d,  $J = 8.1$  Hz, 1H), 7.46 – 7.43 (m, 1H), 7.25 – 7.18 (m, 3H), 7.17 – 7.12 (m, 2H), 7.10 – 7.04 (m, 1H), 7.02 – 6.93 (m, 2H), 6.88 (td,  $J = 7.6, 1.4$  Hz, 1H), 6.81 (td,  $J = 7.5, 1.3$  Hz, 1H), 6.77 (dd,  $J = 5.7, 2.0$  Hz, 1H), 6.60 (d,  $J = 2.5$  Hz, 1H), 4.69 (d,  $J = 4.8$  Hz, 1H).  $^{13}\text{C}$  NMR (100 MHz,  $\text{CDCl}_3$ )  $\delta$  212.0, 166.2, 139.8, 135.8, 135.1, 133.9, 133.4, 133.2, 129.3, 127.0, 126.9, 126.8, 126.6, 126.4, 126.2, 125.5, 124.3, 121.9, 119.8, 119.2, 112.1, 110.9, 63.3, 54.9. IR (thin film)  $\nu_{\text{max}}/\text{cm}^{-1}$  3399, 3057, 2927, 1701, 1680, 1467, 1345, 1219, 1094, 753. HRMS (ESI):  $m/z$   $[\text{M}+\text{H}]^+$  calculated for  $\text{C}_{25}\text{H}_{18}\text{NOS}$  380.1109, found 380.1117.

**2-(1-Methyl-1*H*-indol-3-yl)spiro[cyclopentane-1,9'-thioxanthen]-3-en-5-one (8d)**

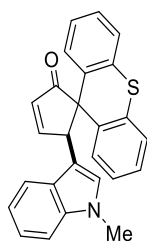

By following the general procedure, the reaction was performed with 9-(furan-2-yl)-9*H*-thioxanthen-9-ol **3c** (100 mg, 0.35 mmol, 1.0 equiv), 1-methyl-1*H*-indole (47 mg, 0.35 mmol, 1.0 equiv), (*R*)-BINOL.PA (3.1 mg, 2.5 mol%) for 10 min at room temperature, the product **8d** (119 mg, 85%) was isolated as shiny gray colour powder after silica gel column chromatography (hexanes/EtOAc 7:3).  $R_f = 0.4$  (30% EtOAc in hexanes). mp 210 °C.  $^1\text{H}$  NMR (400 MHz,  $\text{CDCl}_3$ )  $\delta$  7.72 (dd,  $J = 5.7, 2.9$  Hz, 1H), 7.50 – 7.42 (m, 2H), 7.25 – 7.18 (m, 3H), 7.15 (dd,  $J = 7.9, 1.2$  Hz, 1H), 7.10 – 7.04 (m, 2H), 7.00 – 6.86 (m, 3H), 6.81 (td,  $J = 7.5, 1.4$  Hz, 1H), 6.74 (dd,  $J = 5.7, 2.0$  Hz, 1H), 6.39 (s, 1H), 4.73 – 4.60 (m, 1H), 3.51 (s, 3H).  $^{13}\text{C}$  NMR (100 MHz,  $\text{CDCl}_3$ )  $\delta$  212.0, 166.2, 139.8, 136.6, 135.2, 133.9, 133.1, 129.3, 129.0, 127.3, 127.0, 126.9, 126.7, 126.6, 126.4, 126.2, 125.4, 121.4, 119.8, 118.7, 110.3, 108.0, 63.3, 54.8, 32.6. IR (thin film)  $\nu_{\text{max}}/\text{cm}^{-1}$  3690, 3021, 2408, 2342, 1708, 1533, 1477, 1216, 749, 617. HRMS (ESI):  $m/z$   $[\text{M}]^+$  calculated for  $\text{C}_{26}\text{H}_{19}\text{NOS}$  393.1187, found 393.1200.

## 2-(1*H*-Indol-3-yl)spiro[cyclopentane-1,9'-fluoren]-3-en-5-one (**8e**)

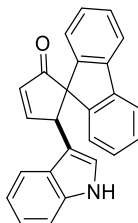

By following the general procedure, the reaction was performed with 9-(furan-2-yl)-9*H*-fluoren-9-ol **3a** (100 mg, 0.40 mmol, 1.0 equiv), indole (47 mg, 0.40 mmol, 1.0 equiv), (*R*)-BINOL.PA (3.5 mg, 2.5 mol%) for 10 min, the product **8e** (120 mg, 86%) was isolated as shiny gray colour powder after silica gel column chromatography (hexanes/EtOAc 7:3).  $R_f = 0.4$  (30% EtOAc in hexanes). mp 94 °C.  $^1\text{H NMR}$  (400 MHz,  $\text{CDCl}_3$ )  $\delta$  8.32 (dd,  $J = 5.7, 2.5$  Hz, 1H), 8.02 (s, 1H), 7.73 (d,  $J = 7.3$  Hz, 1H), 7.56 – 7.36 (m, 4H), 7.12 (d,  $J = 8.2$  Hz, 1H), 7.04 (td,  $J = 7.5, 1.0$  Hz, 1H), 6.99 – 6.93 (m, 1H), 6.80 (d,  $J = 1.9$  Hz, 1H), 6.77 – 6.67 (m, 3H), 6.56 (dd,  $J = 12.7, 7.9$  Hz, 2H), 5.03 (dd,  $J = 2.2, 1.7$  Hz, 1H).  $^{13}\text{C NMR}$  (100 MHz,  $\text{CDCl}_3$ )  $\delta$  208.1, 165.8, 146.8, 143.6, 142.0, 141.9, 136.0, 134.6, 128.3, 127.8, 127.6, 127.1, 126.4, 125.0, 122.4, 122.1, 121.7, 120.5, 119.9, 119.5, 119.0, 114.3, 110.9, 68.4, 50.2. IR (thin film)  $\nu_{\text{max}}/\text{cm}^{-1}$  3812, 3426, 3379, 3047, 3016, 1702, 1449, 1160, 745, 662. HRMS (ESI):  $m/z$   $[\text{M}+\text{H}]^+$  calculated for  $\text{C}_{25}\text{H}_{18}\text{NO}$  348.1388, found 348.1398.

### 2.8. Gram Scale Synthesis of Hydroxy Spirocyclopentenone Oxindole **2b**

To a solution of furfuryl alcohol **1b** (1 g, 4.6 mmol, 1.0 equiv) in HFIP/ $\text{H}_2\text{O}$  (3:1, 9 mL), was added (*R*)-BINOL.PA catalyst (40 mg, 0.12 mmol, 2.5 mol%). Then the reaction mixture was stirred at 90 °C temperature for 1.5 h (the reaction was monitored by TLC). Upon completion, the reaction was quenched with water (5 mL) and extracted with ethyl acetate (2 x 15 mL). The combined organic layer was dried over anhydrous  $\text{Na}_2\text{SO}_4$  and filtered. The solvent was removed by rotary evaporation and the residue was purified by silica gel column chromatography using hexanes/EtOAc (hexanes/EtOAc 6: 4) to obtain spirocyclopentenoneoxindole **2b** (0.665 g, 62%) as a pale yellow solid.

## 2.9. Product Derivatization

### 2-((4-Methoxyphenyl)amino)spiro[cyclopentane-1,9'-fluoren]-5-one (**9**)<sup>2</sup>

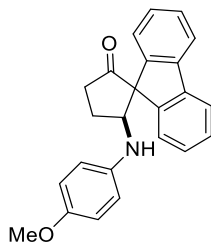

To a flask charged with a solution of compound **6g** (200 mg, 0.56 mmol) in EtOAc (6 mL) was added Pd/C (50 mg, 10 wt%) in one portion. The flask was evacuated and refilled with H<sub>2</sub> with a balloon. The reaction mixture was stirred under H<sub>2</sub> atmosphere for 3 h before it was filtered through a pad of celite, which was washed with EtOAc (10 mL x 3). The filtrate was concentrated, and the crude mixture was purified by silica gel column chromatography (hexanes/EtOAc 7:3) to give product **9** (179 mg, 89%) as white solid. mp 144 °C. <sup>1</sup>H NMR (400 MHz, CDCl<sub>3</sub>) δ 7.74 (dd, *J* = 7.6, 1.0 Hz, 1H), 7.67 – 7.60 (m, 1H), 7.43 (ddd, *J* = 7.6, 6.1, 2.4 Hz, 2H), 7.37 – 7.30 (m, 4H), 6.55 – 6.48 (m, 2H), 6.21 (d, *J* = 9.0 Hz, 2H), 4.70 (dd, *J* = 10.8, 6.7 Hz, 1H), 3.64 (s, 3H), 3.13 (s, 1H), 3.01 – 2.85 (m, 2H), 2.80 – 2.63 (m, 1H), 2.37 – 2.19 (m, 1H). <sup>13</sup>C NMR (100 MHz, CDCl<sub>3</sub>) δ 215.21, 152.52, 146.24, 142.81, 142.02, 141.41, 140.51, 128.76, 128.34, 128.12, 127.45, 124.30, 123.06, 121.21, 120.36, 115.82, 114.54, 69.89, 62.48, 55.82, 38.18, 28.78. IR (thin film)  $\nu_{max}/\text{cm}^{-1}$  3733, 3662, 3527, 3116, 2013, 1872, 1748, 1514, 1238, 758, 667. HRMS (ESI): *m/z* [M+H]<sup>+</sup> calculated for C<sub>24</sub>H<sub>22</sub>NO<sub>2</sub> 356.1651, found 356.1668.

### *tert*-Butyl-(2-oxospiro[cyclopentane-1,9'-fluoren]-5-yl)carbamate (**10**)

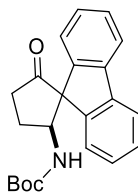

To a solution of compound **9** (100 mg, 0.282 mmol, 1.0 equiv) in CH<sub>3</sub>CN (6 mL) at 0 °C, was added an aqueous 1 M solution of H<sub>2</sub>SO<sub>4</sub> (3 mL). Next, a solution of aqueous ceric ammonium nitrate (2 mL, 0.912 mmol, 0.25 g/mL concentration) was added dropwise. The mixture was stirred at 0 °C for 2 h. The mixture was extracted with DCM (20 mL x 3). The combined organic layers were washed with a saturated aqueous Na<sub>2</sub>SO<sub>3</sub> solution (5 mL) and a saturated aqueous K<sub>2</sub>CO<sub>3</sub>

solution (5 mL) and dried over anhydrous  $\text{Na}_2\text{SO}_4$  and concentrated. The crude residue was dissolved in DCM (2 mL), was added DIPEA (1.1equiv) and Boc anhydride (1.1 equiv) at room temperature and maintained for 8 h. The mixture was extracted with DCM (3 x 10 mL) and dried over anhydrous  $\text{Na}_2\text{SO}_4$  and concentrated. The filtrate was concentrated, and the crude mixture was purified by silica gel column chromatography (hexanes/EtOAc 8:2) to give product **10** (71 mg, 73%) as white solid. mp 153 °C.  $^1\text{H}$  NMR (400 MHz,  $\text{CDCl}_3$ )  $\delta$  7.79 (d,  $J = 7.5$  Hz, 1H), 7.76 – 7.69 (m, 1H), 7.41 (ddd,  $J = 21.6, 14.2, 6.6$  Hz, 4H), 7.34 – 7.26 (m, 2H), 4.95 (s, 1H), 4.15 (d,  $J = 26.2$  Hz, 1H), 2.91 (dd,  $J = 18.8, 9.3$  Hz, 2H), 2.79 – 2.62 (m, 1H), 2.40 – 2.16 (m, 1H), 1.24 (d,  $J = 7.6$  Hz, 9H).  $^{13}\text{C}$  NMR (100 MHz,  $\text{CDCl}_3$ )  $\delta$  214.0, 155.1, 144.9, 142.6, 141.8, 140.8, 128.9, 128.4, 128.3, 127.5, 124.0, 123.7, 121.2, 120.1, 79.8, 77.2, 68.5, 57.1, 37.8, 28.14. IR (thin film)  $\nu_{\text{max}}/\text{cm}^{-1}$  3619, 3569, 3238, 2990, 1746, 1721, 1503, 1490, 1375, 1248, 1165, 1132, 75. HRMS (EI):  $m/z$   $[\text{M}]^+$  calculated for  $\text{C}_{22}\text{H}_{23}\text{N}_1\text{O}_3$  349.1678, found 349.1692.

### 3. <sup>1</sup>H, <sup>13</sup>C and <sup>19</sup>F NMR Spectra of Compounds

#### 3-(Furan-2-yl)-3-hydroxy-1-methylindolin-2-one (1a)

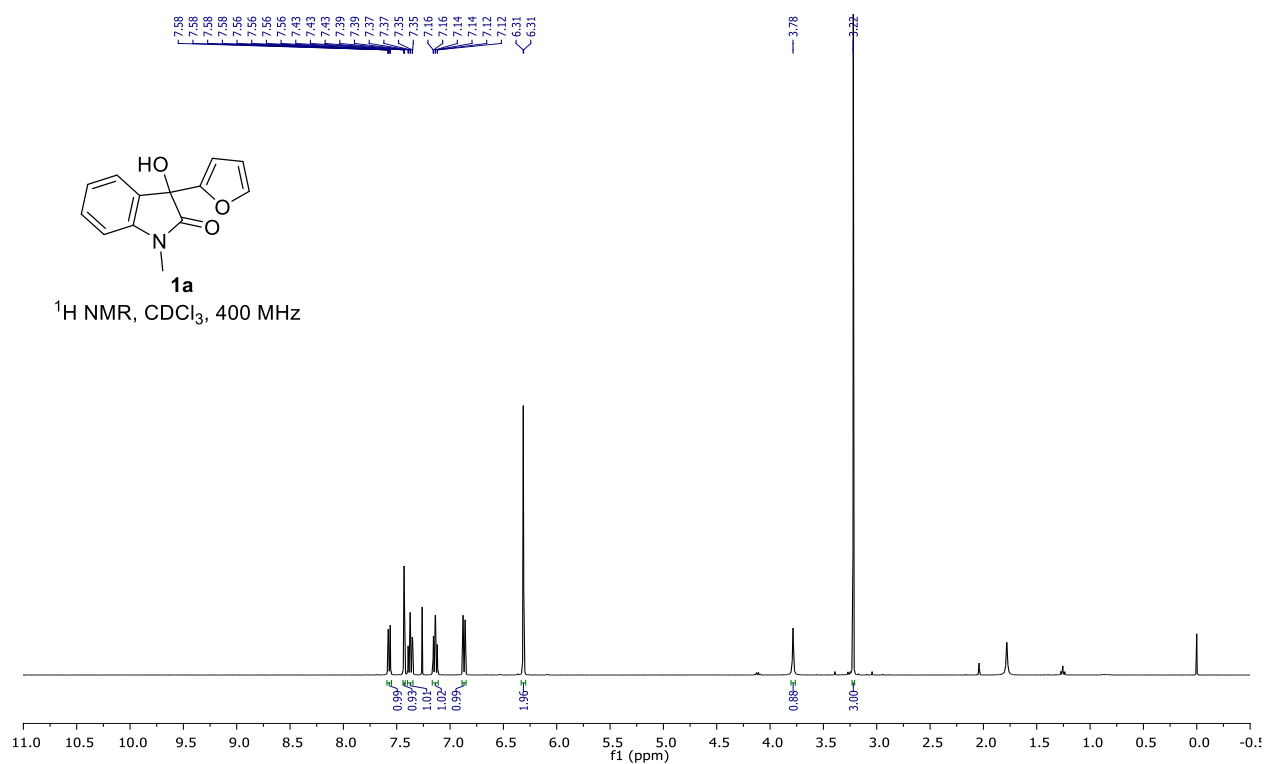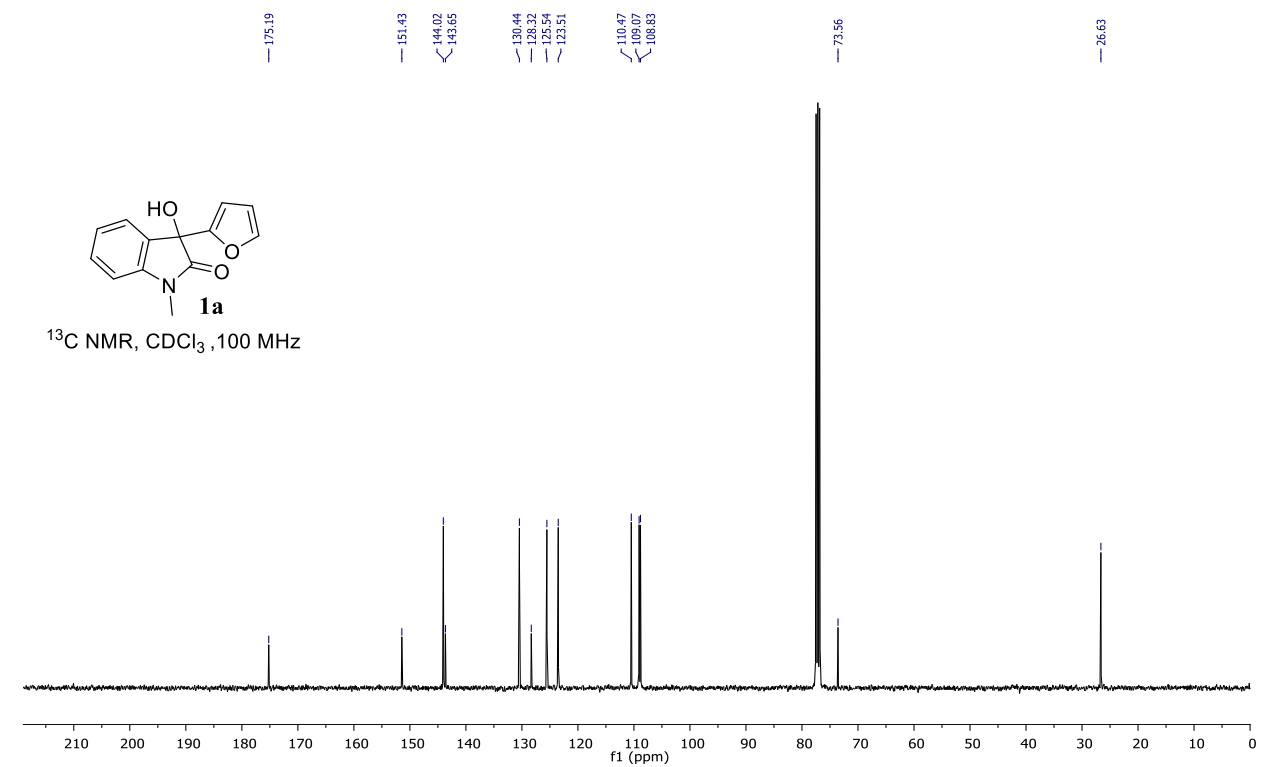

### 3-(Furan-2-yl)-3-hydroxy-1-methylindolin-2-one (1b)

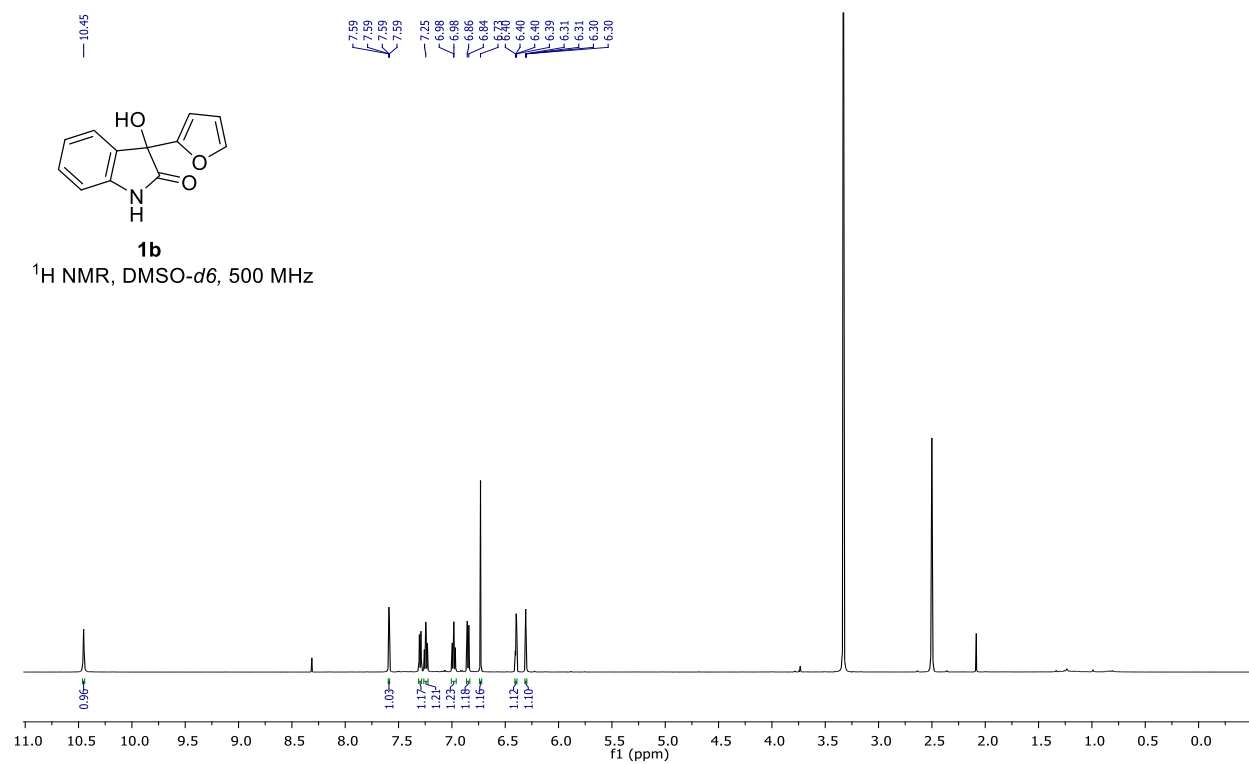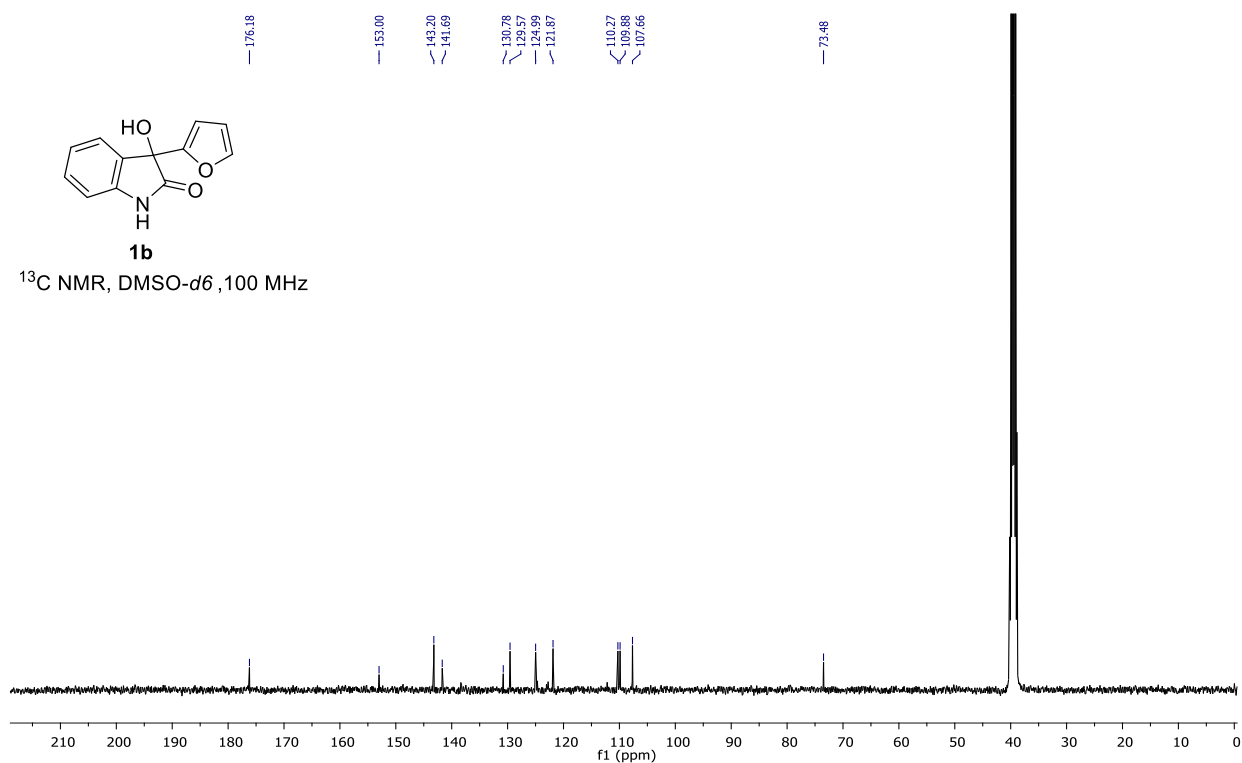



# 5-Bromo-3-(furan-2-yl)-3-hydroxyindolin-2-one (1c)

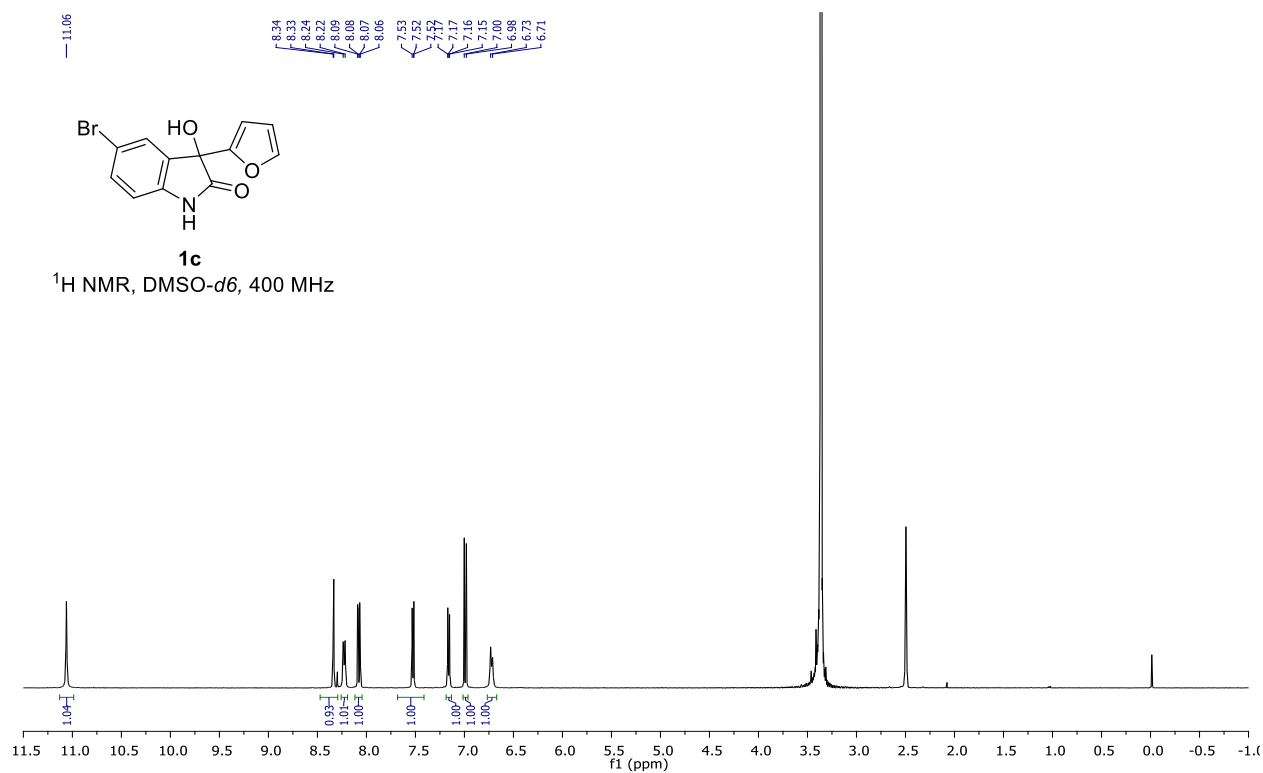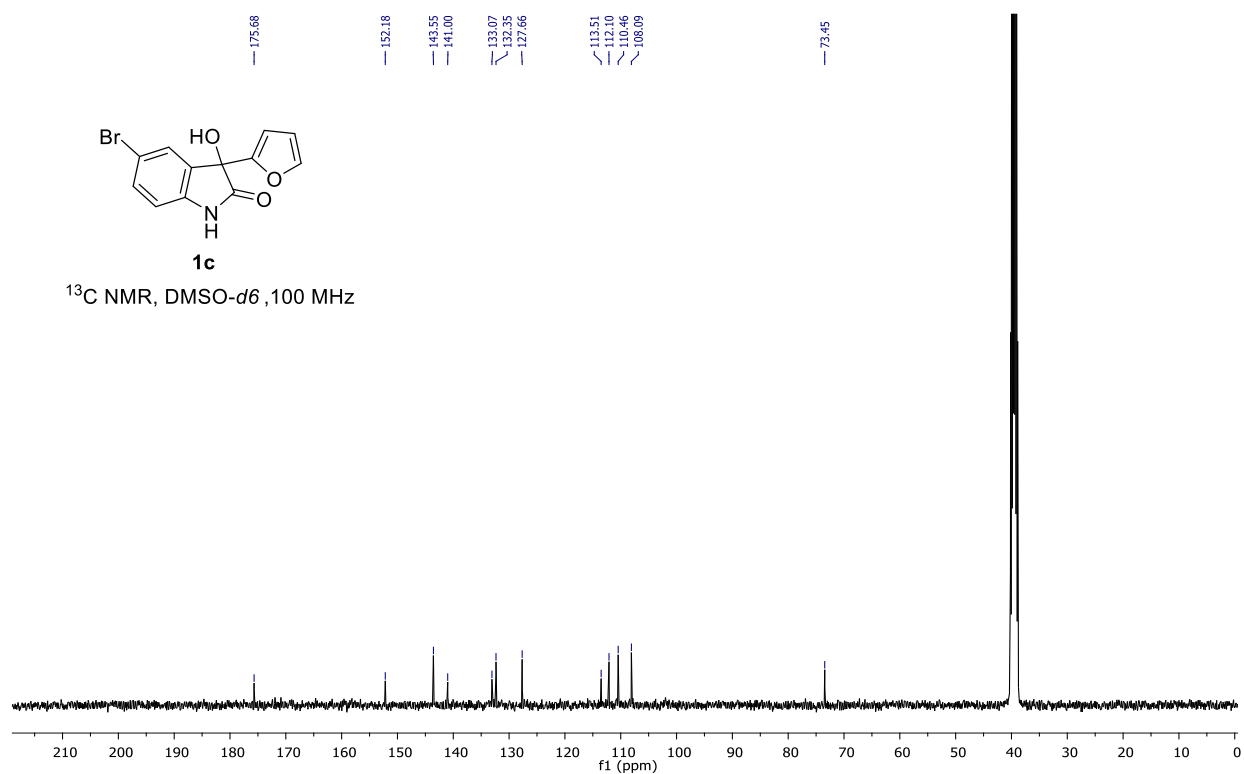



### 3-(Furan-2-yl)-3-hydroxy-5-methylindolin-2-one (1e)

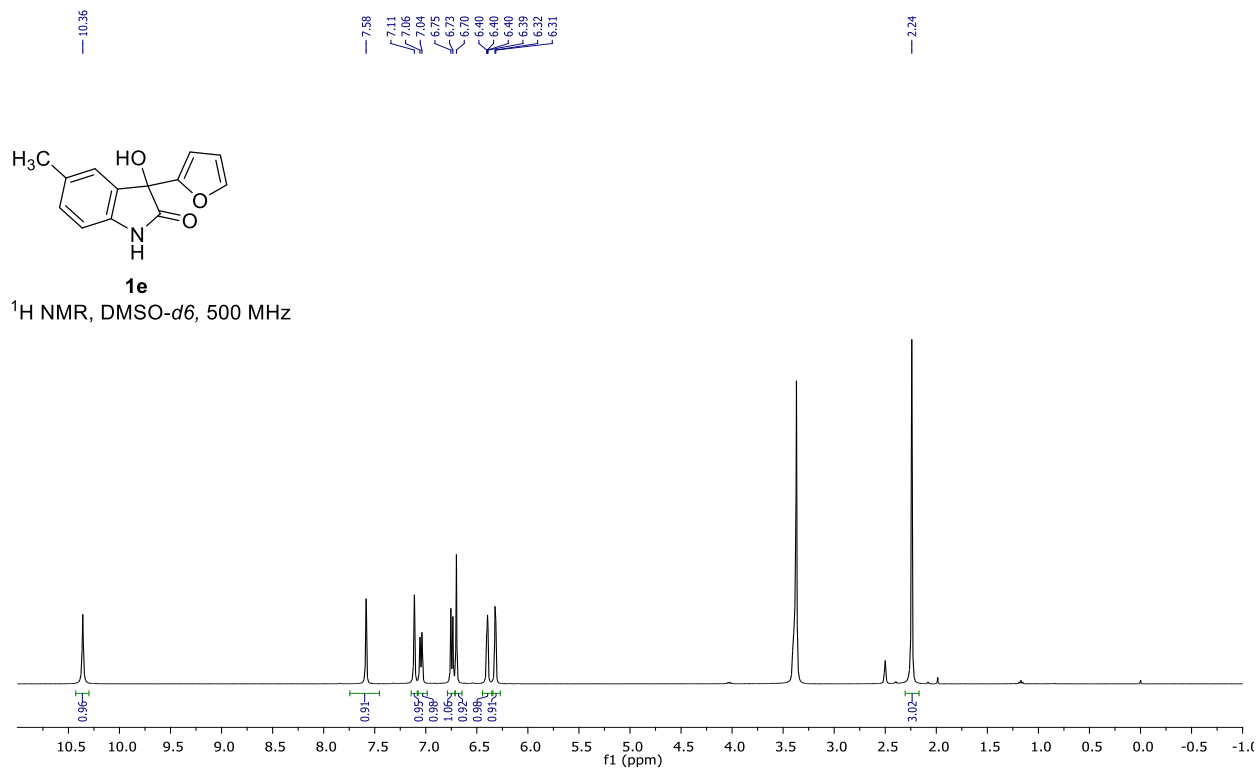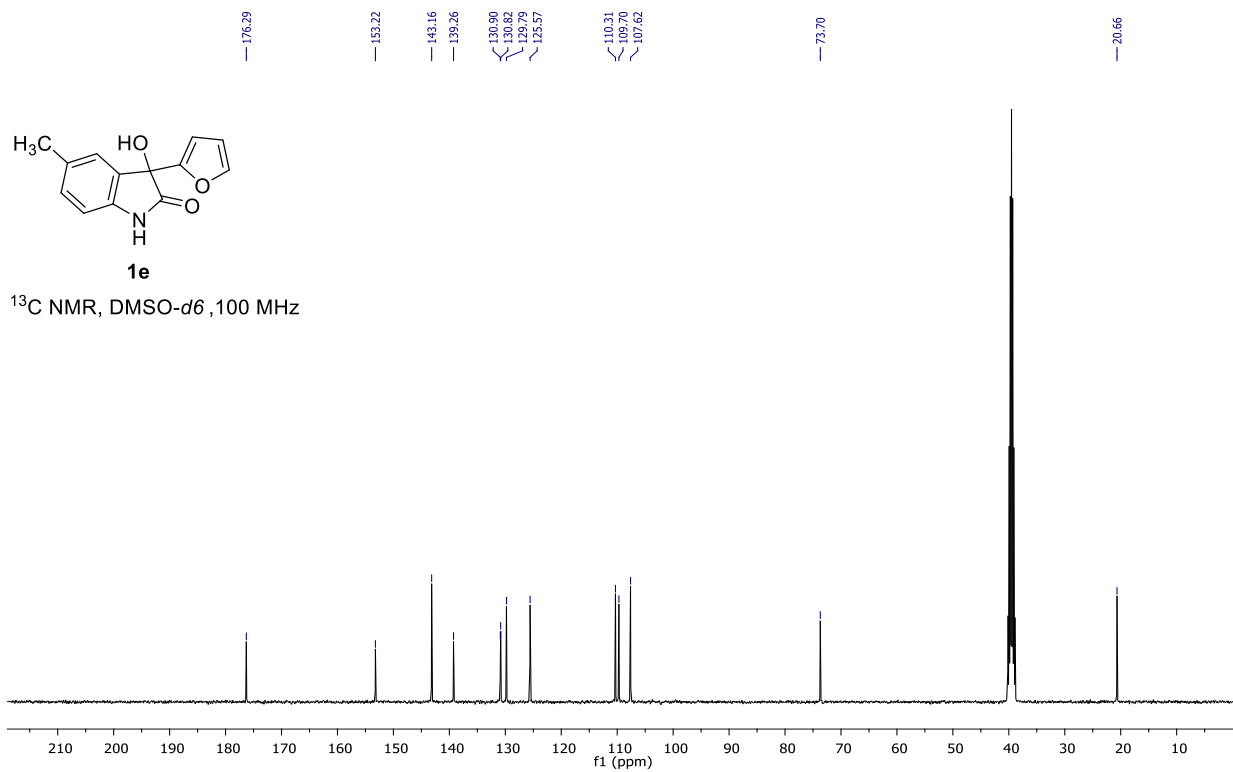

# 4,7-Dichloro-3-(furan-2-yl)-3-hydroxyindolin-2-one (1f)

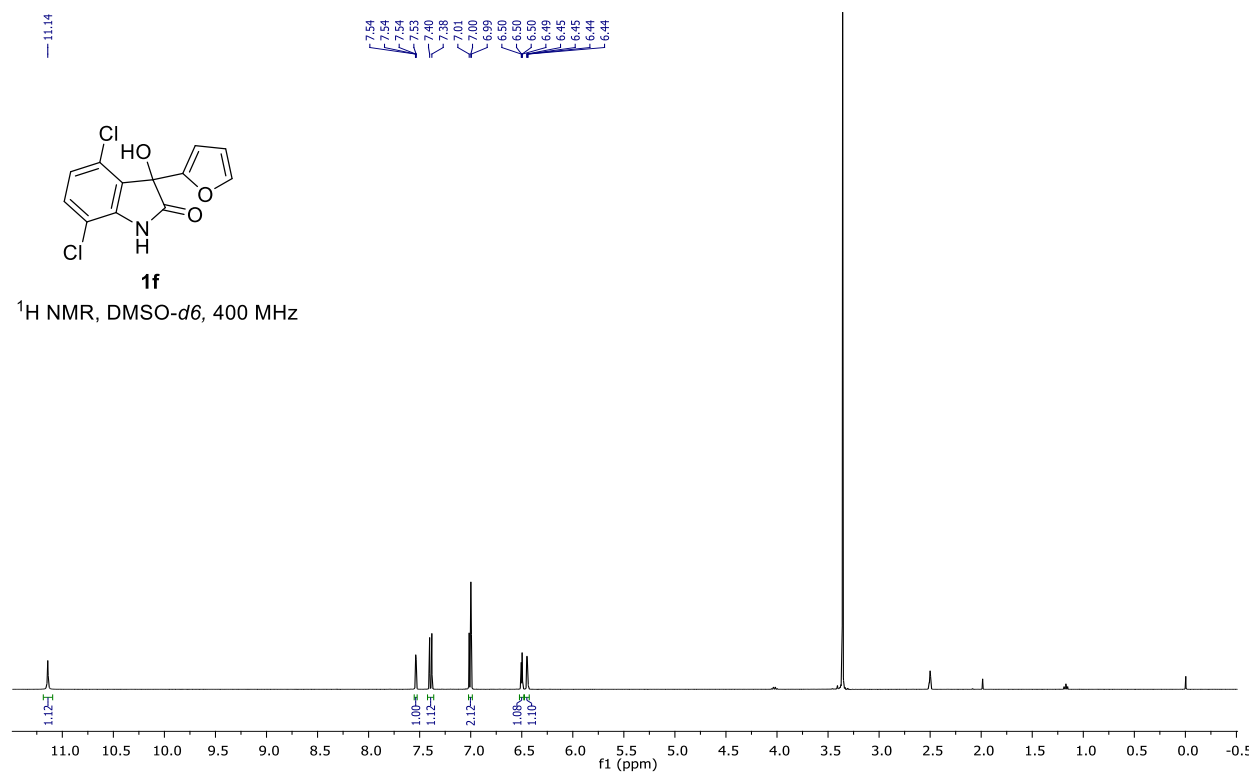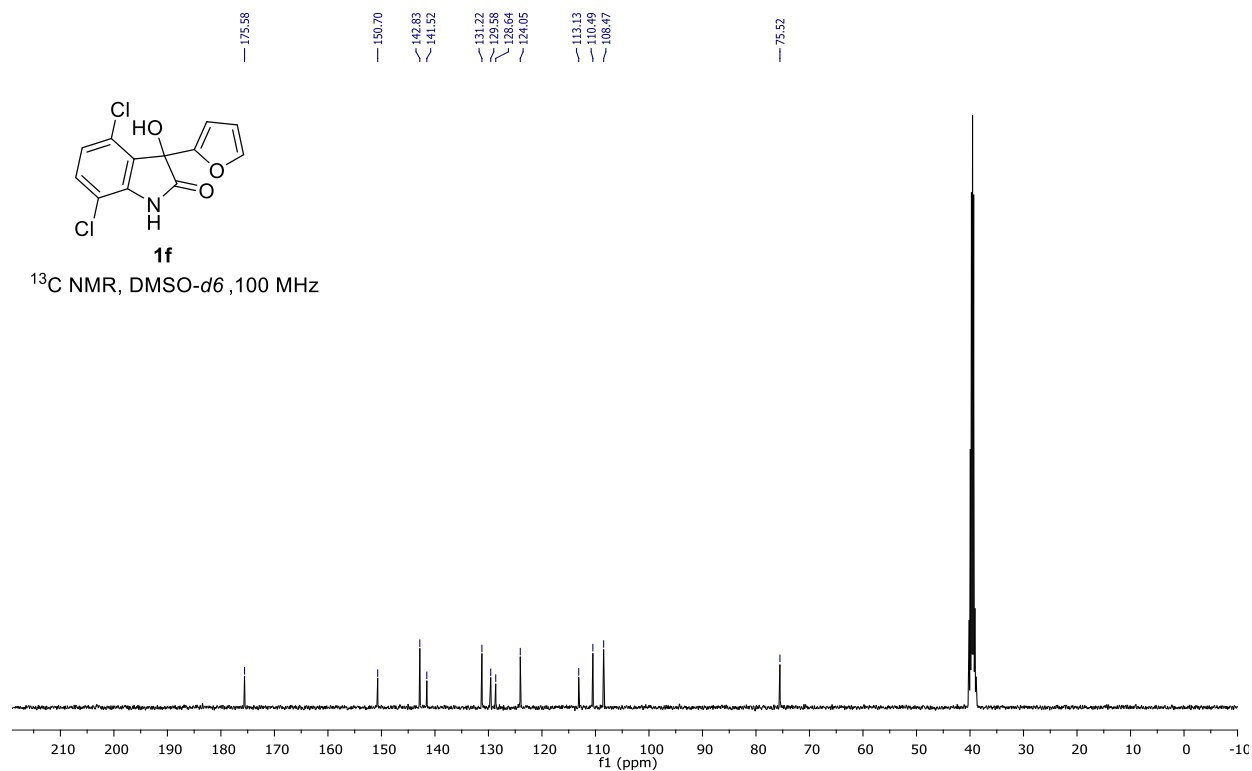

# 9-(Furan-2-yl)-9H-fluoren-9-ol (3a)

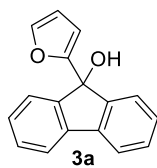

<sup>1</sup>H NMR, CDCl<sub>3</sub>, 500 MHz

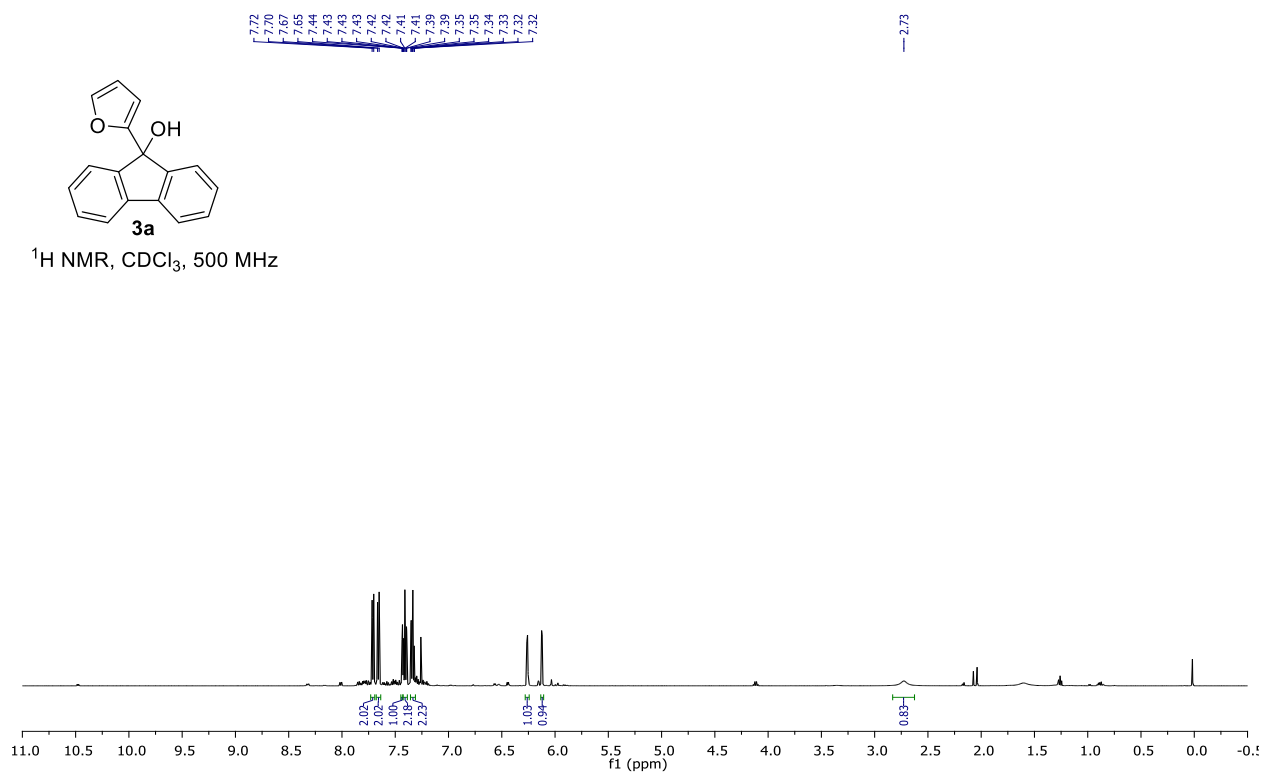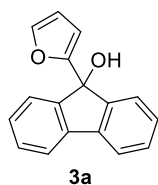

<sup>13</sup>C NMR, CDCl<sub>3</sub>, 100 MHz

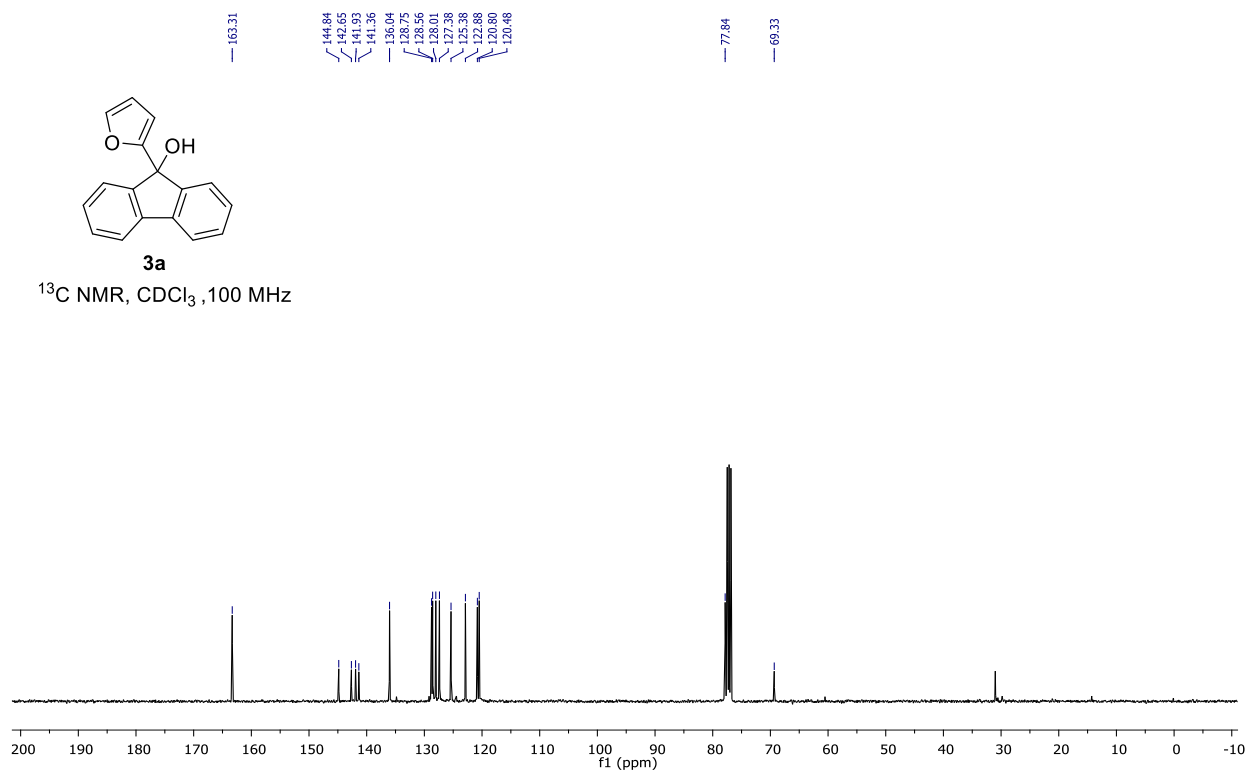

# 9-(Furan-2-yl)-9H-xanthen-9-ol (3b)

7.61  
7.60  
7.59  
7.58  
7.57  
7.38  
7.36  
7.35  
7.34  
7.31  
7.30  
7.29  
7.21  
7.19  
7.17  
7.15  
7.13  
6.31  
6.30  
6.29  
6.25  
6.24  
6.24

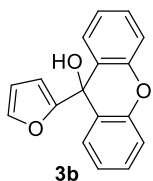

<sup>1</sup>H NMR, CDCl<sub>3</sub>, 500 MHz

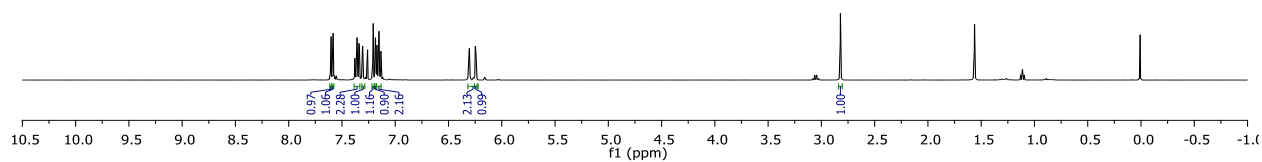

157.63  
150.15  
142.92  
129.78  
128.46  
124.28  
123.56  
116.73  
110.17  
107.46  
67.90

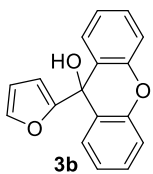

<sup>13</sup>C NMR, CDCl<sub>3</sub>, 100 MHz

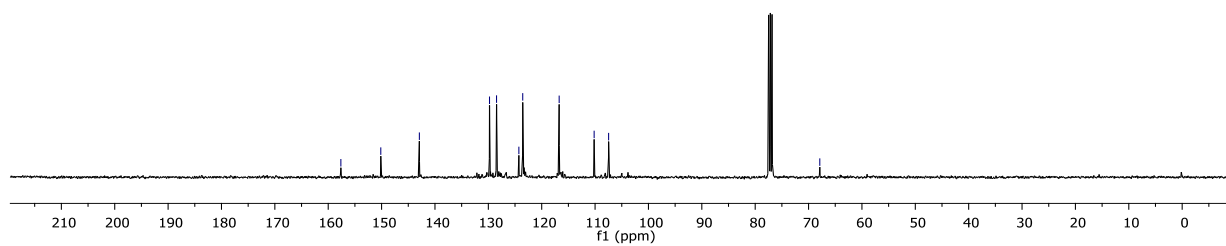

# 9-(Furan-2-yl)-9H-thioxanthen-9-ol (3c)

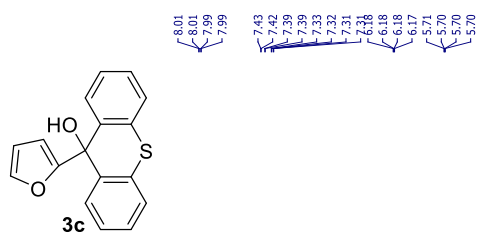

$^1\text{H NMR}$ ,  $\text{CDCl}_3$ , 400 MHz

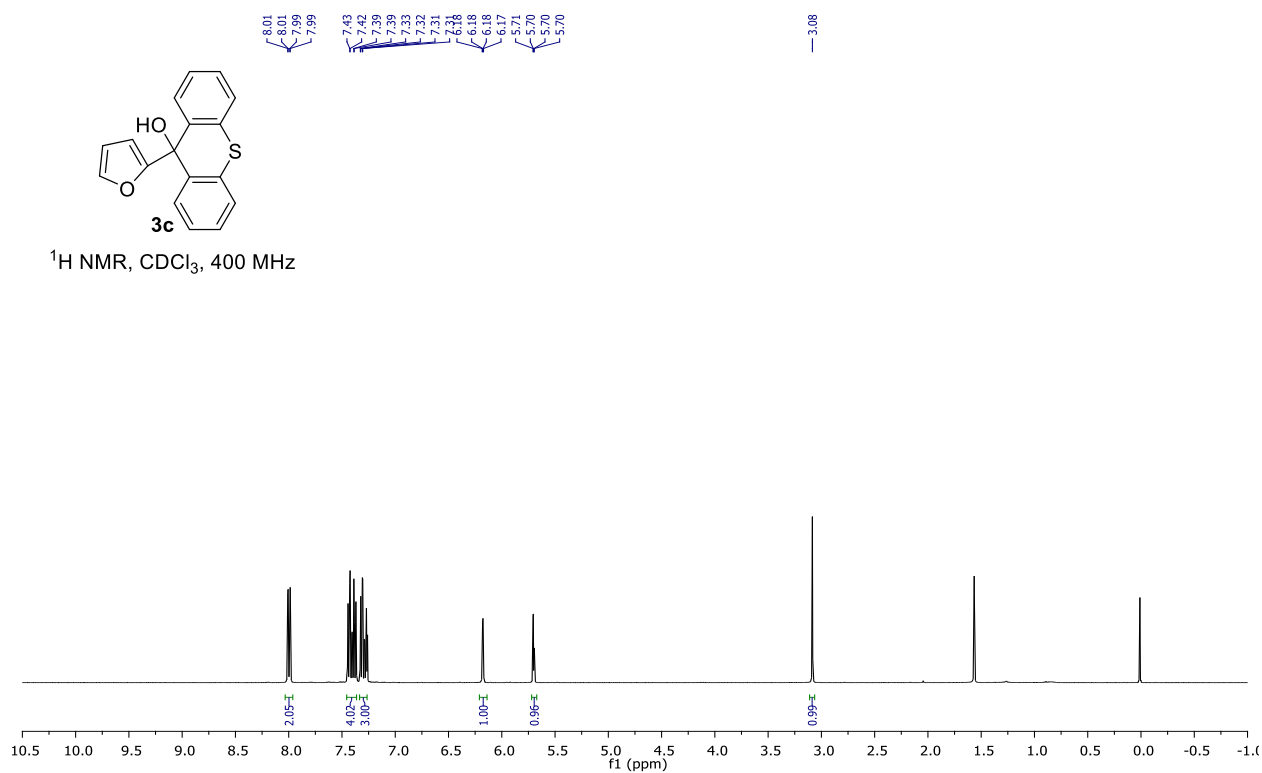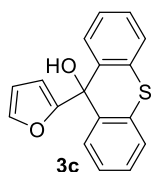

$^{13}\text{C NMR}$ ,  $\text{CDCl}_3$ , 100 MHz

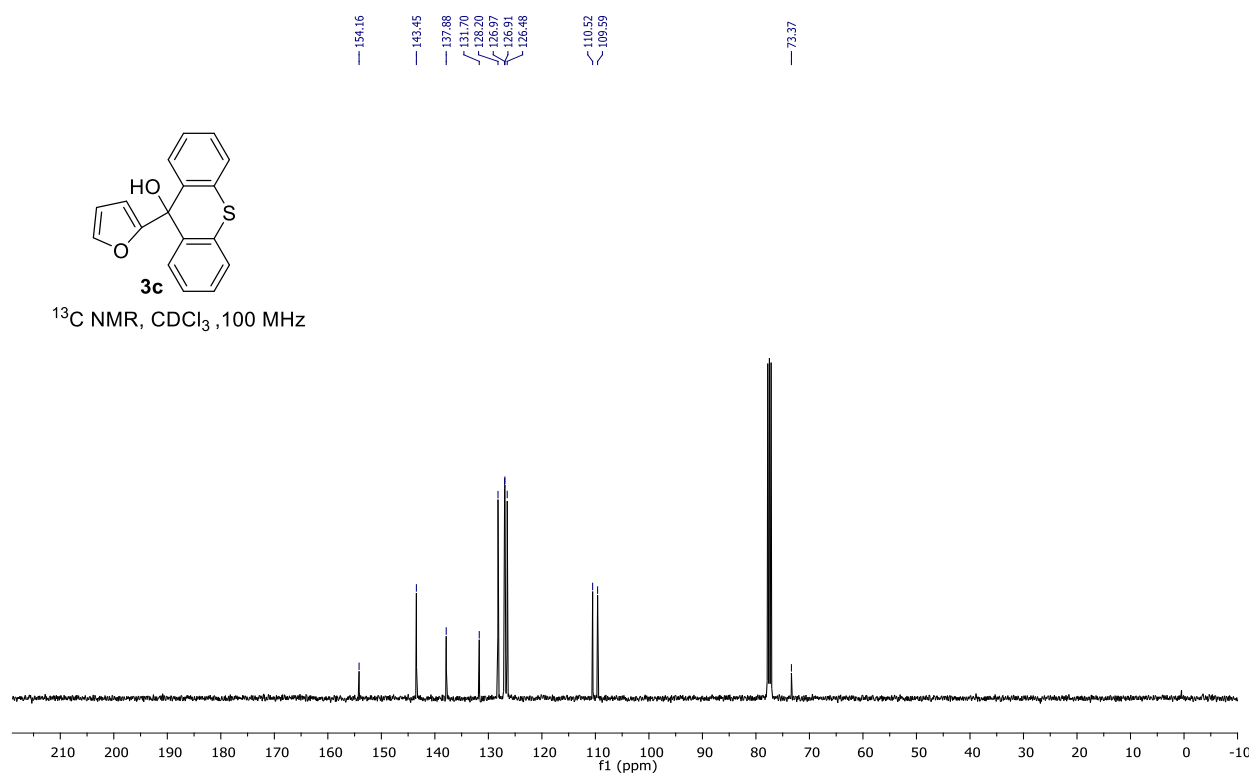

## 2-Hydroxy-1'-methylspiro[cyclopentane-1,3'-indolin]-3-ene-2',5-dione (2a)

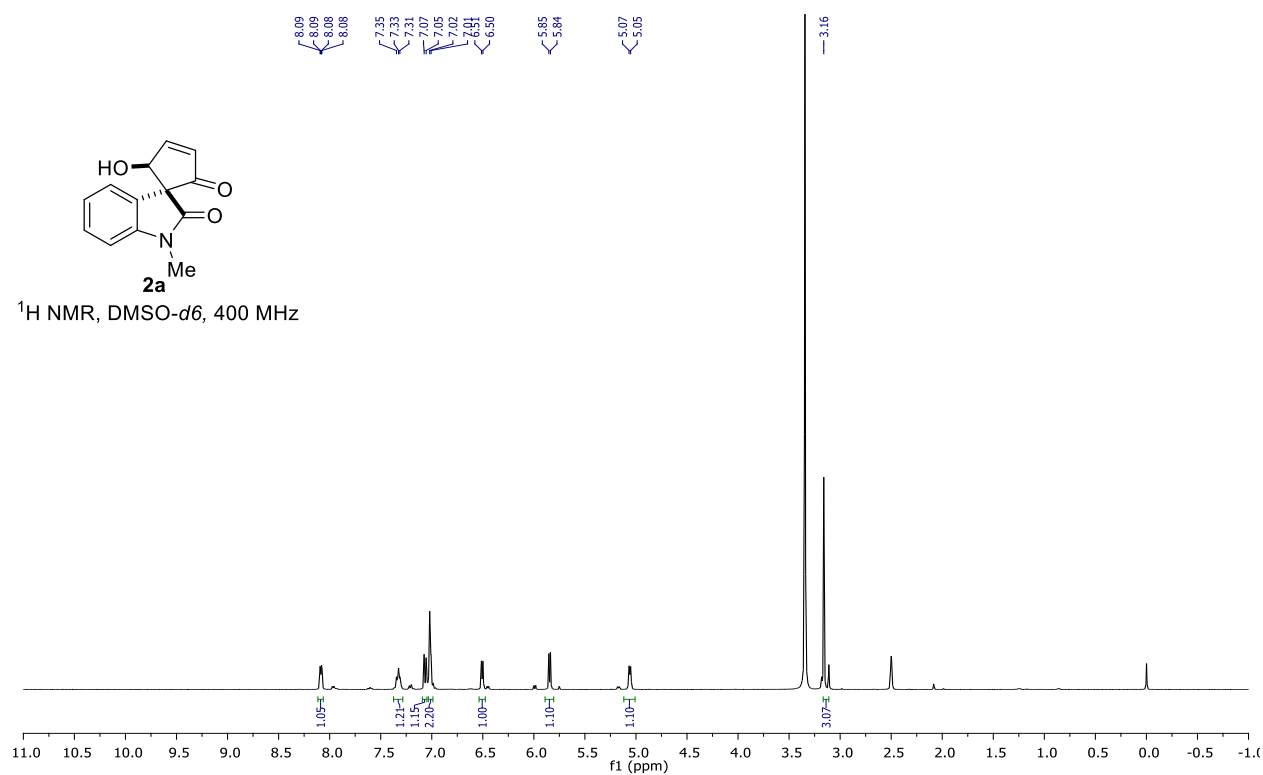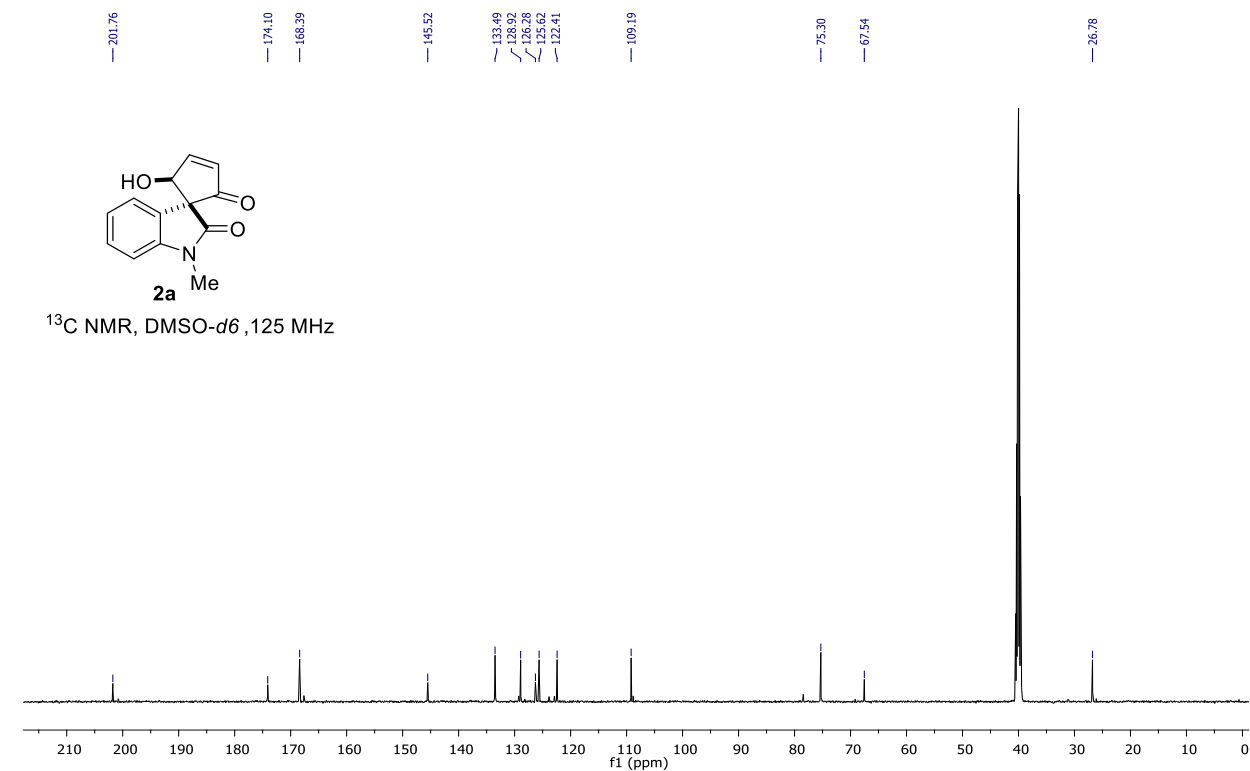



### 3-(*tert*-Butoxy)-3-(furan-2-yl)-1-methylindolin-2-one (2a')

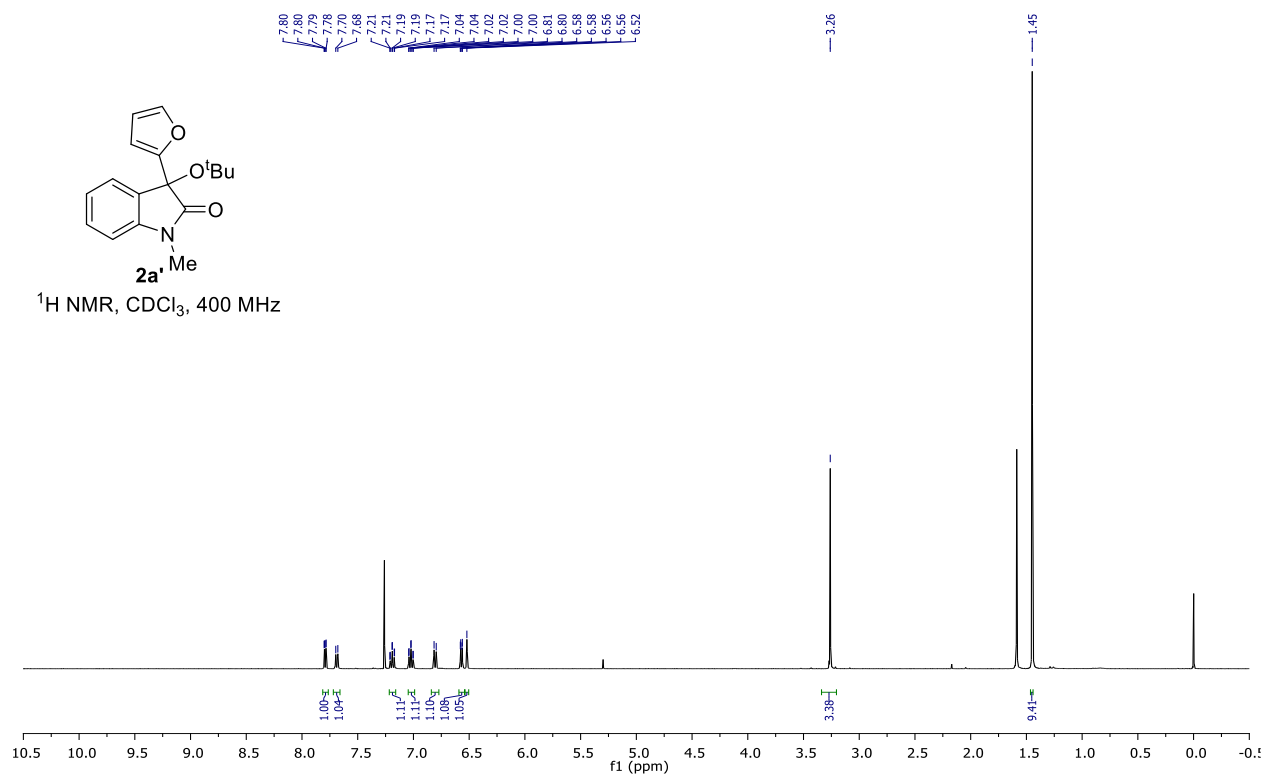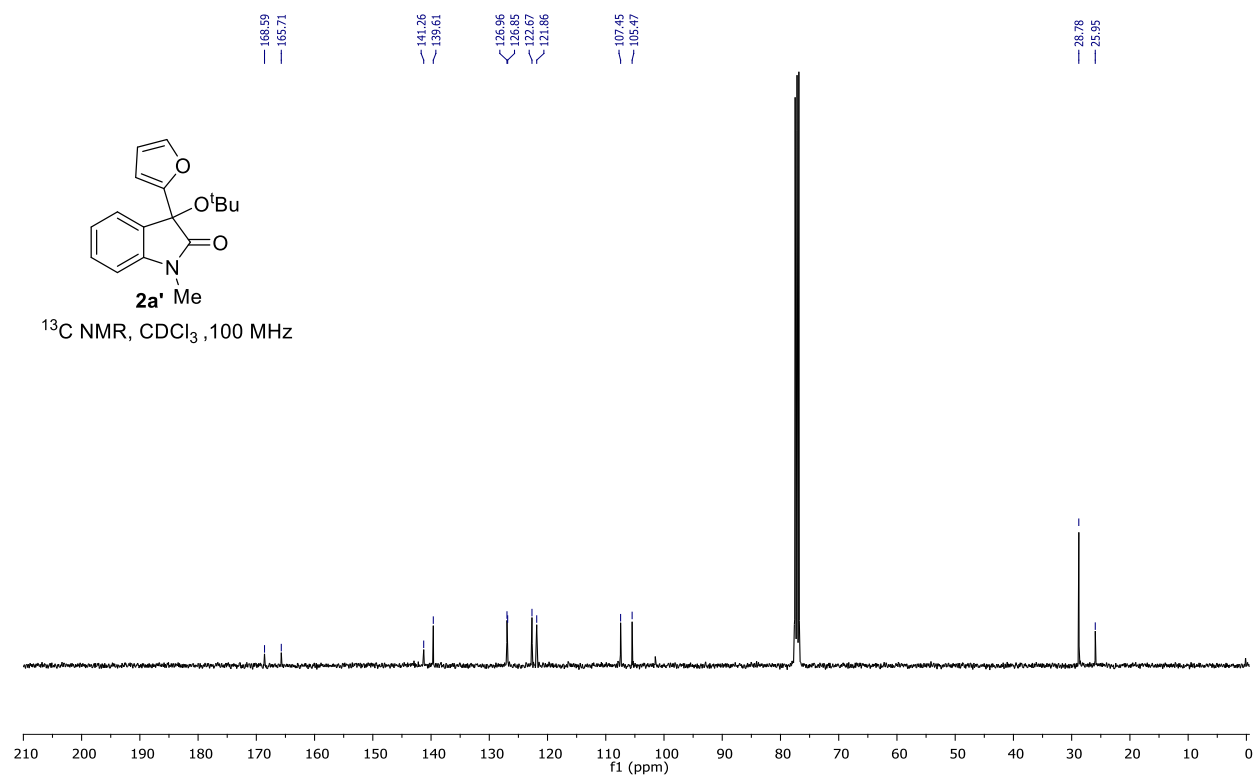

## 2-Hydroxyspiro[cyclopentane-1,3'-indolin]-3-ene-2',5-dione (2b)

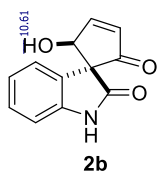

$^1\text{H}$  NMR, DMSO- $d_6$ , 400 MHz

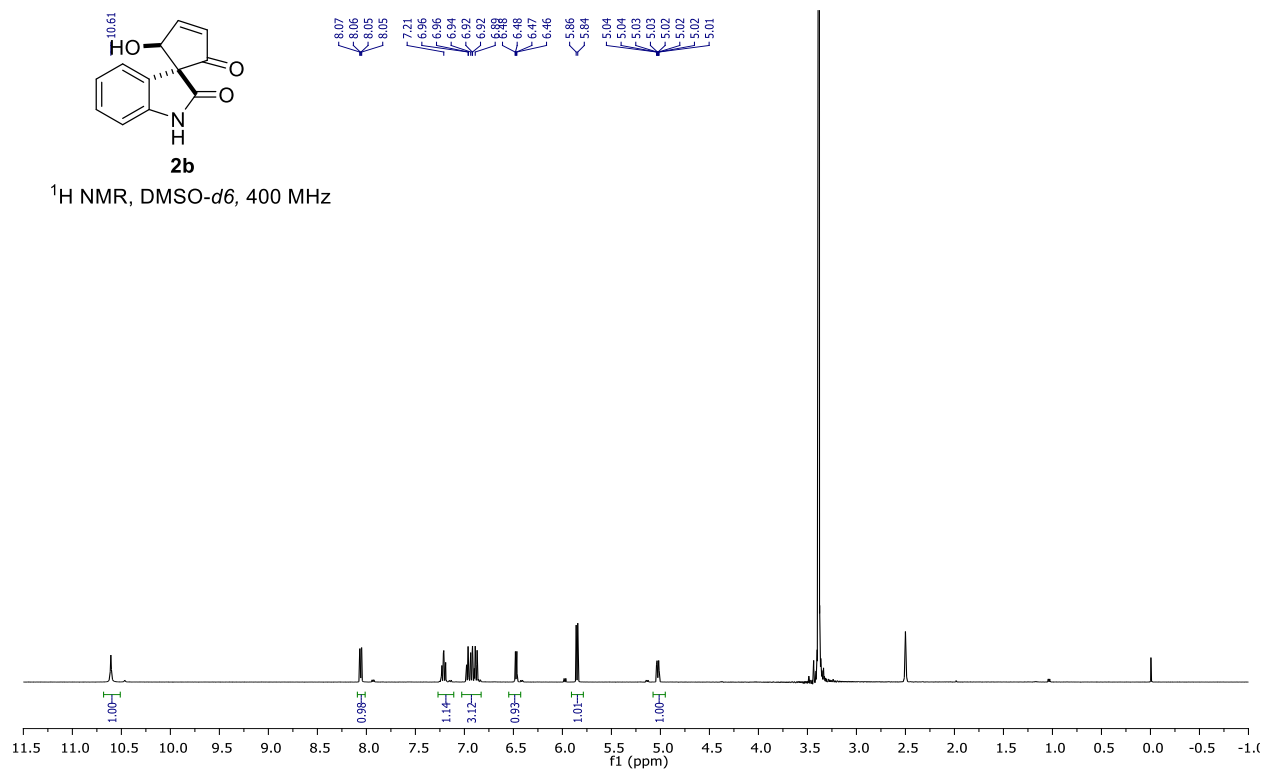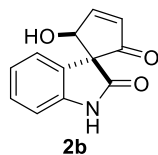

$^{13}\text{C}$  NMR, DMSO- $d_6$ , 125 MHz

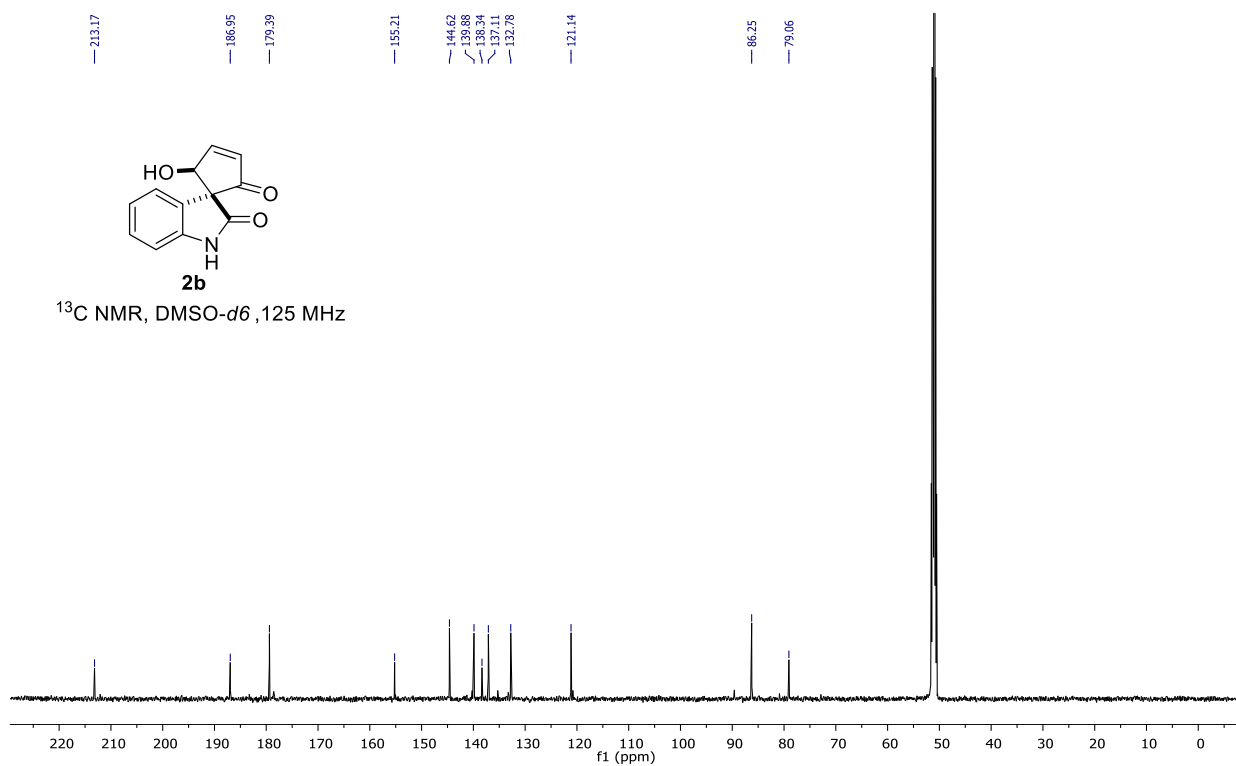

# 5'-Bromo-2-hydroxyspiro[cyclopentane-1,3'-indolin]-3-ene-2',5-dione (2c)

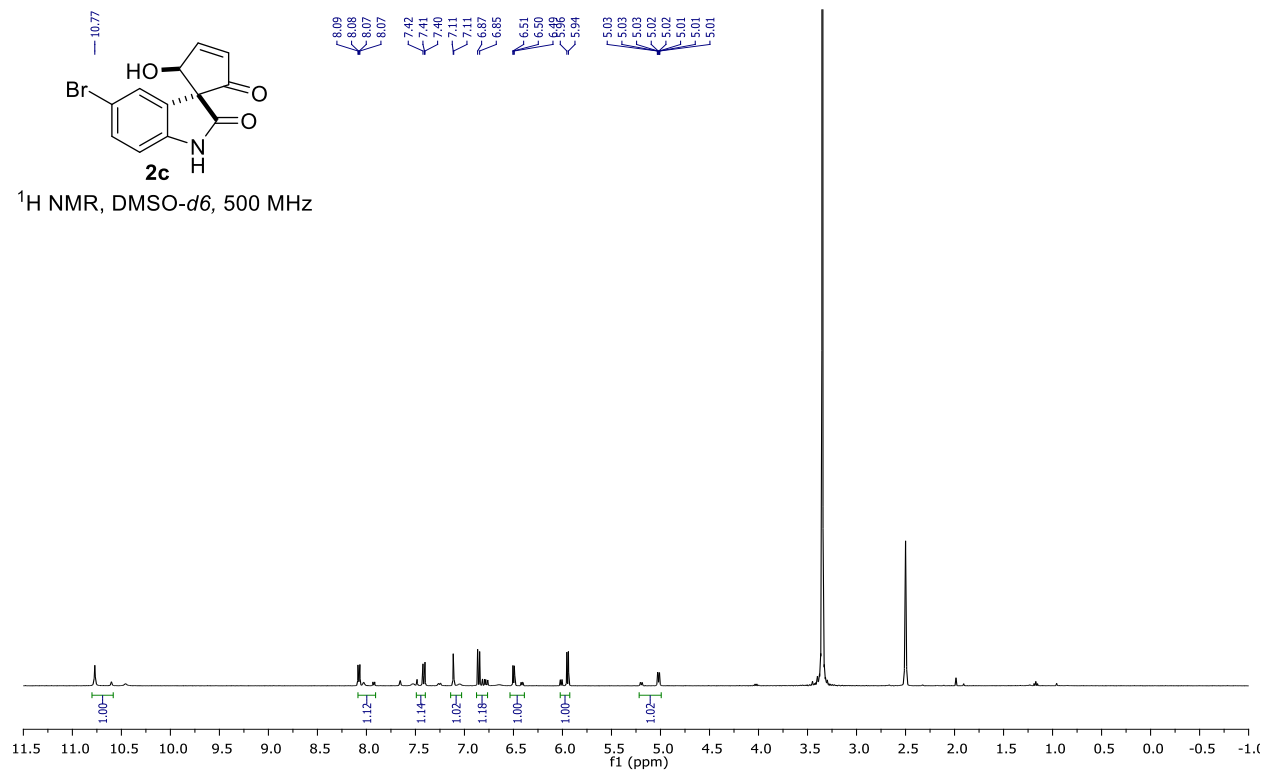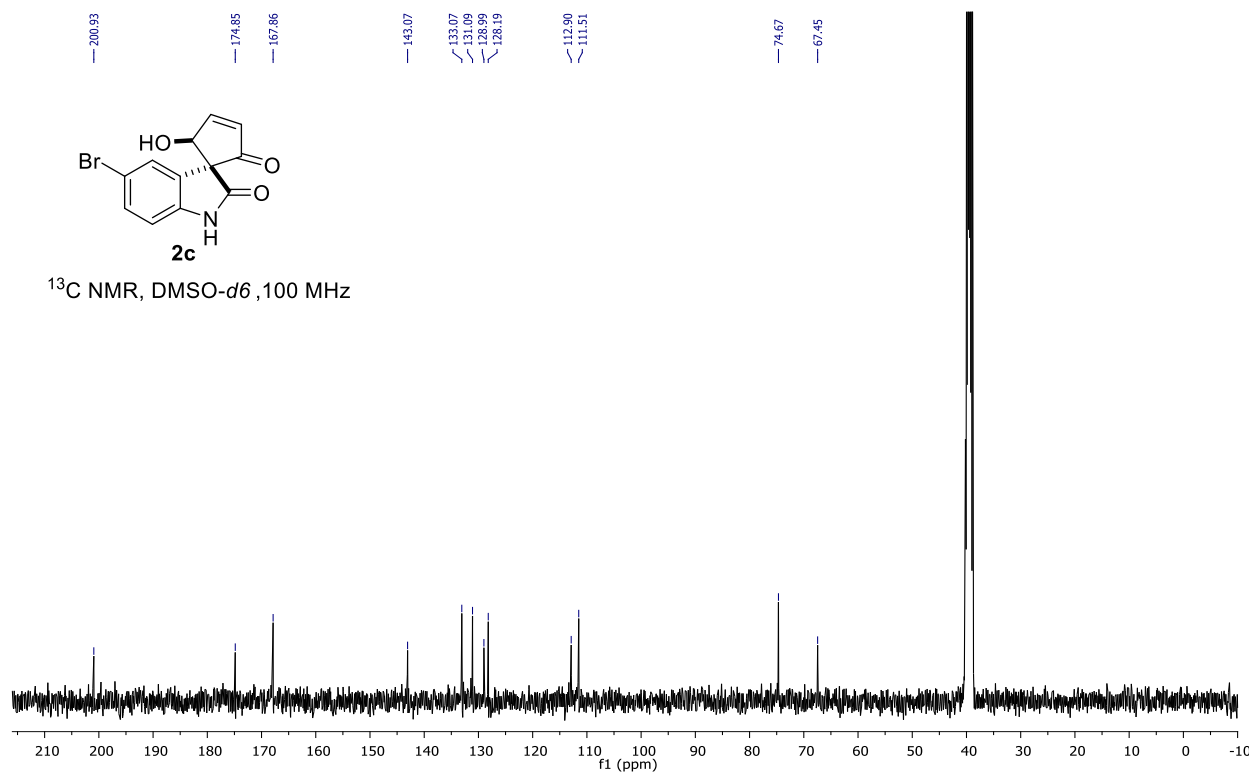

# 4'-Bromo-2-hydroxyspiro[cyclopentane-1,3'-indolin]-3-ene-2',5-dione (2d)

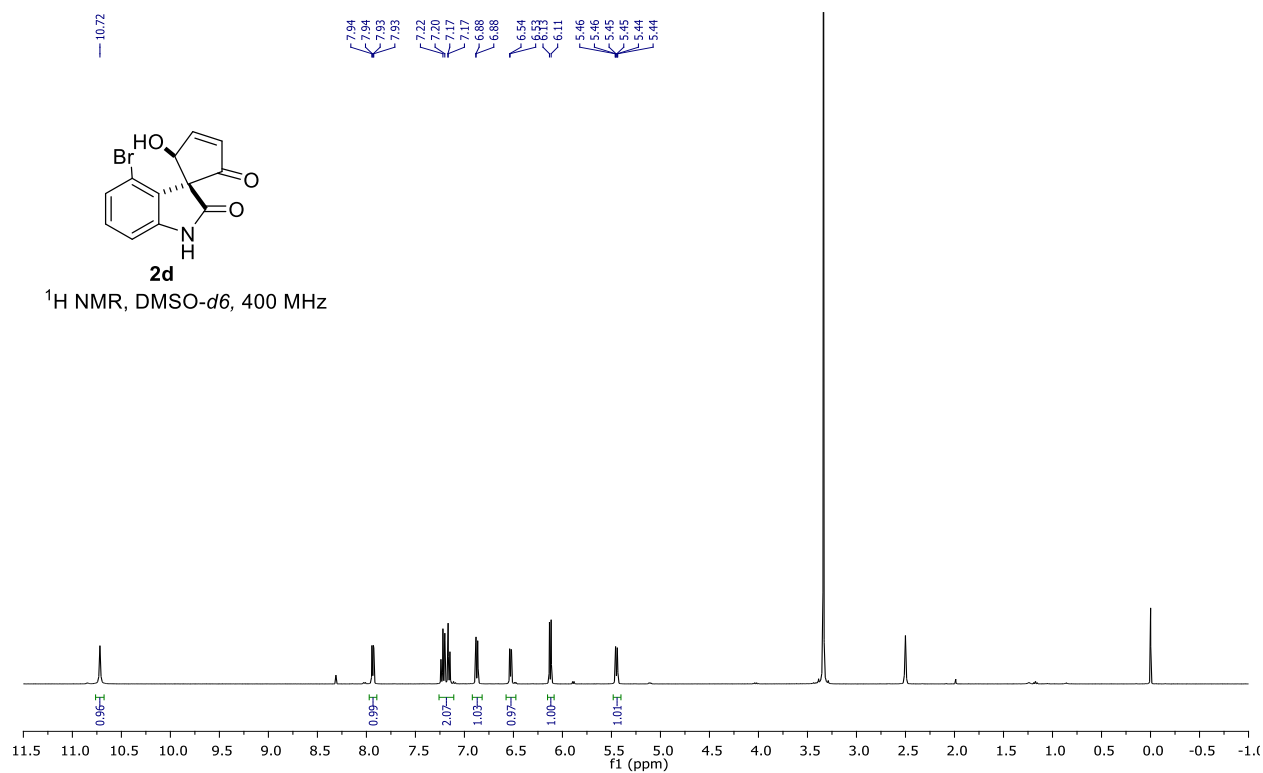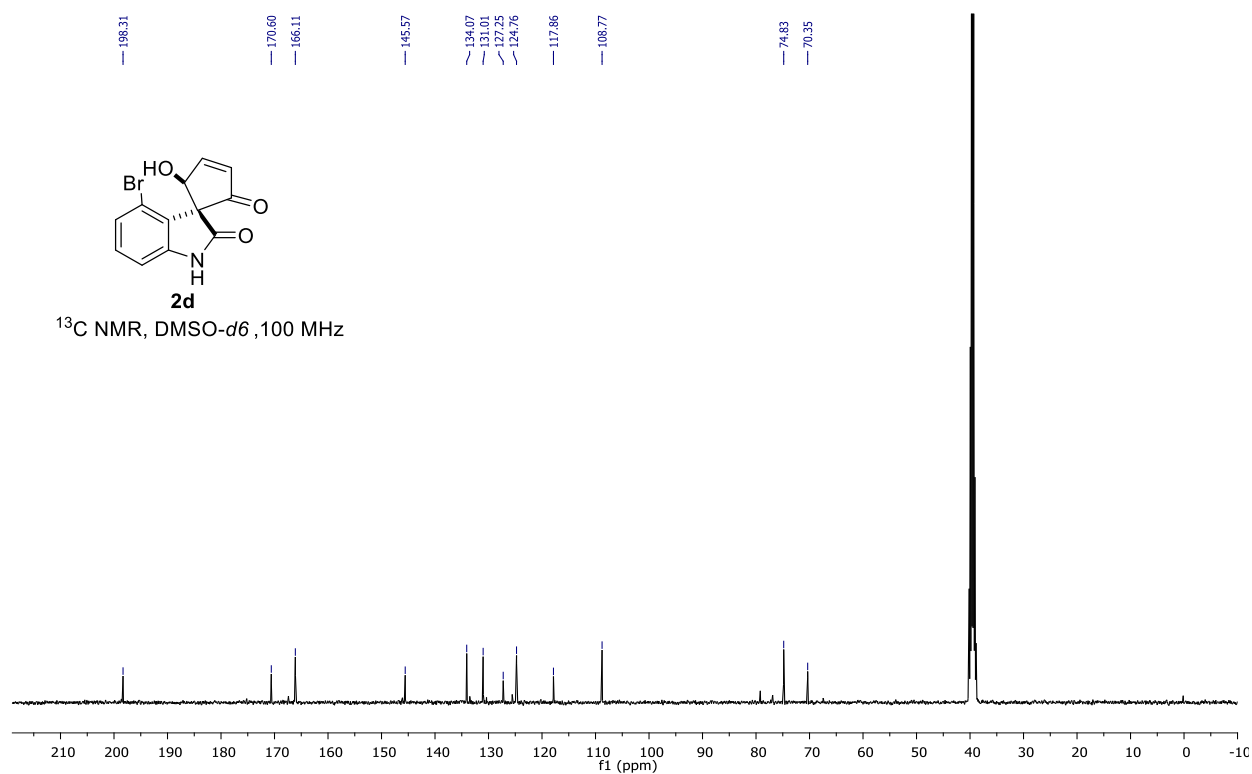

## 2-Hydroxy-5'-methylspiro[cyclopentane-1,3'-indolin]-3-ene-2',5-dione (2e)

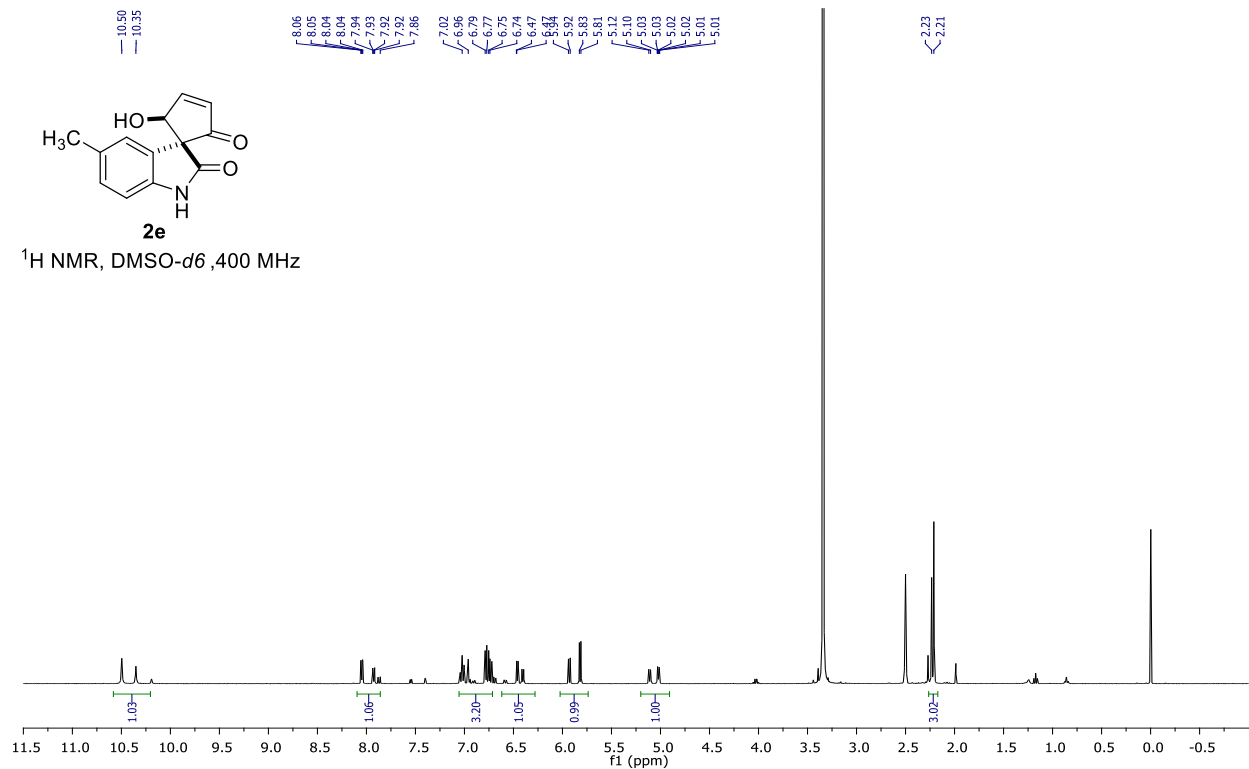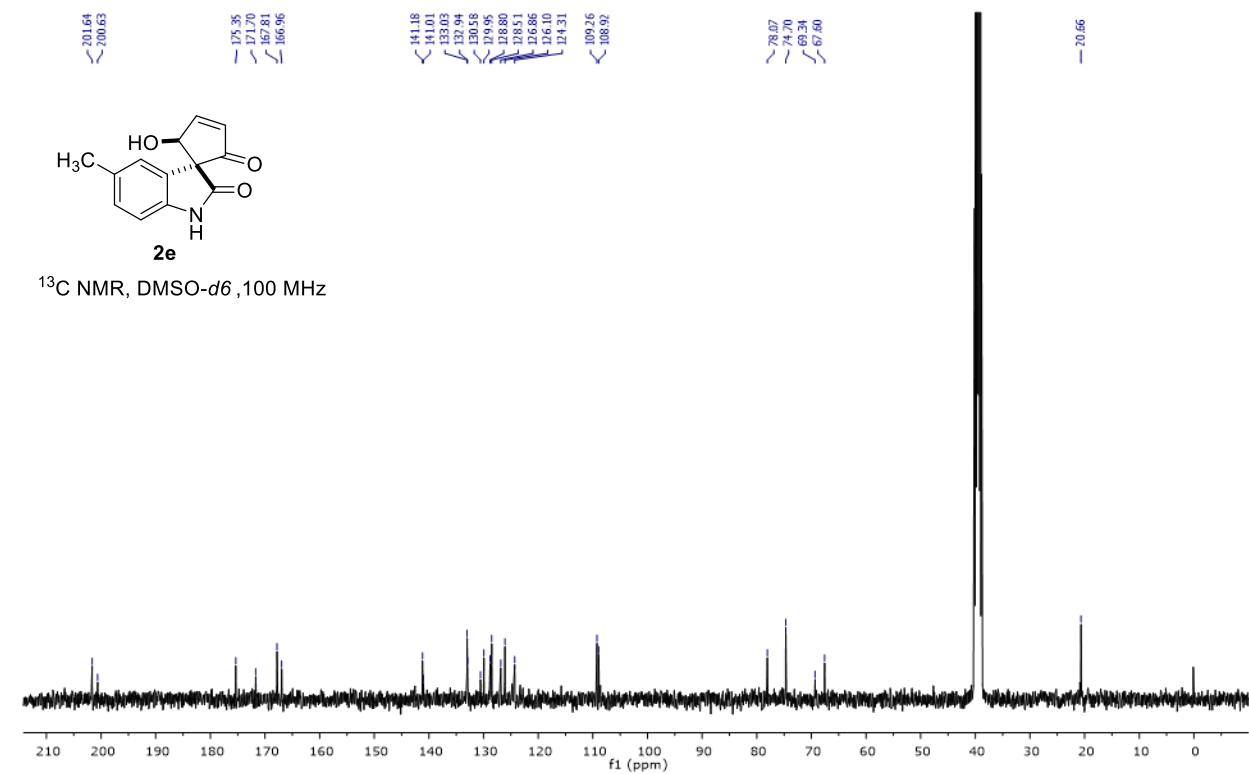

# 4',7'-Dichloro-2-hydroxyspiro[cyclopentane-1,3'-indolin]-3-ene-2',5-dione (2f)

11.22

7.88  
7.97  
7.96  
7.41  
7.39  
7.07  
6.56  
6.55  
6.33  
6.21

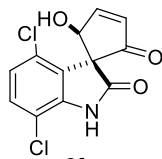

2f

<sup>1</sup>H NMR, DMSO-*d*<sub>6</sub>, 500 MHz

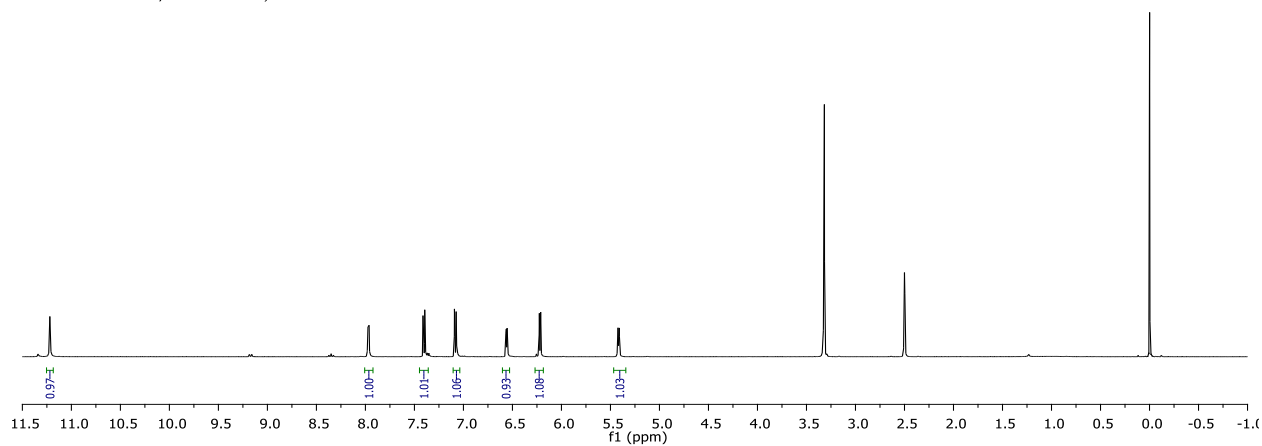

197.73

170.50  
166.49

142.91

132.78

130.60  
127.46

126.75

123.03

112.89

74.89

70.40

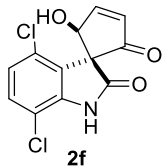

2f

<sup>13</sup>C NMR, DMSO-*d*<sub>6</sub>, 100 MHz

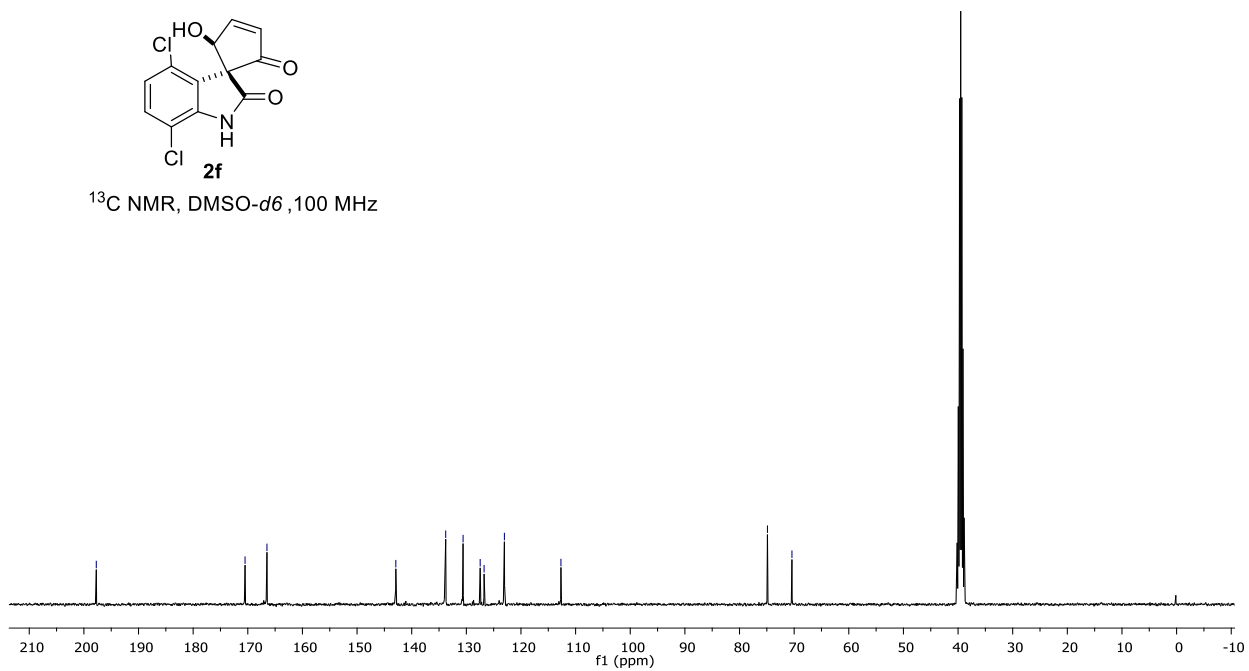

## 2-Hydroxyspiro[cyclopentane-1,9'-fluoren]-3-en-5-one (4a)

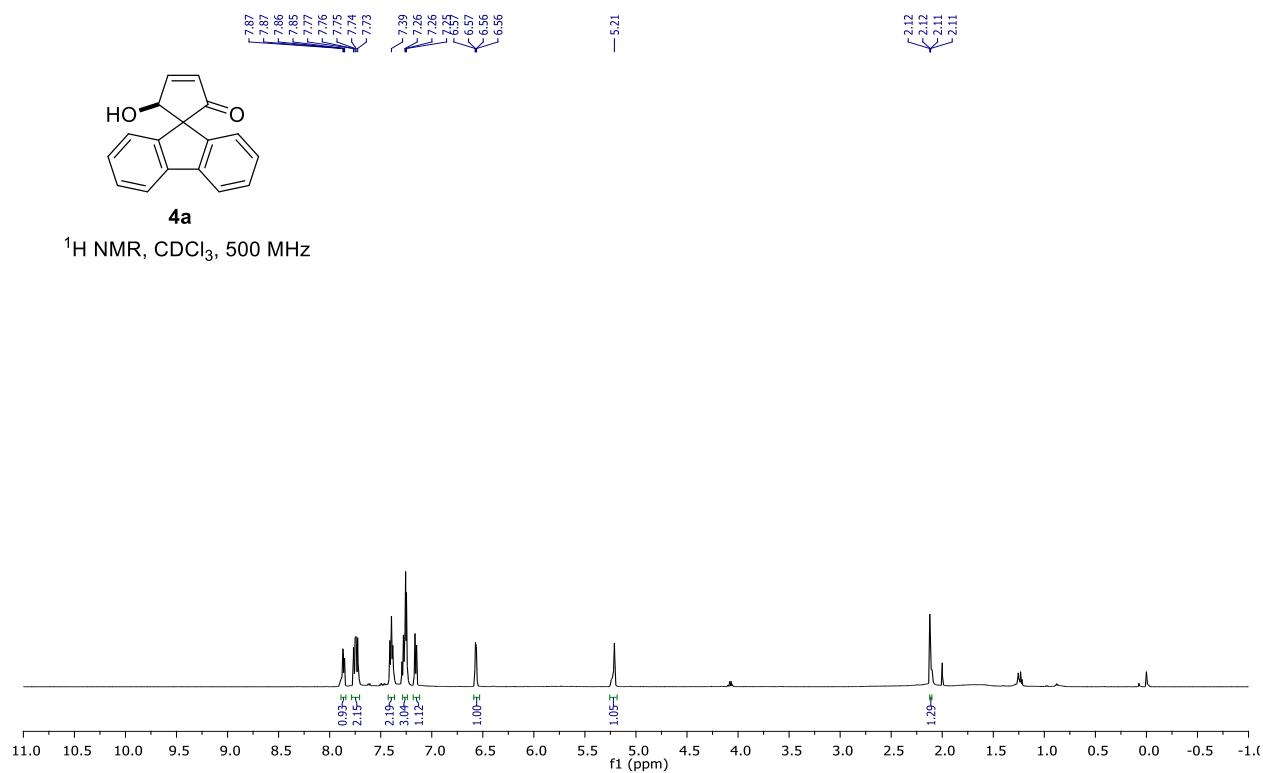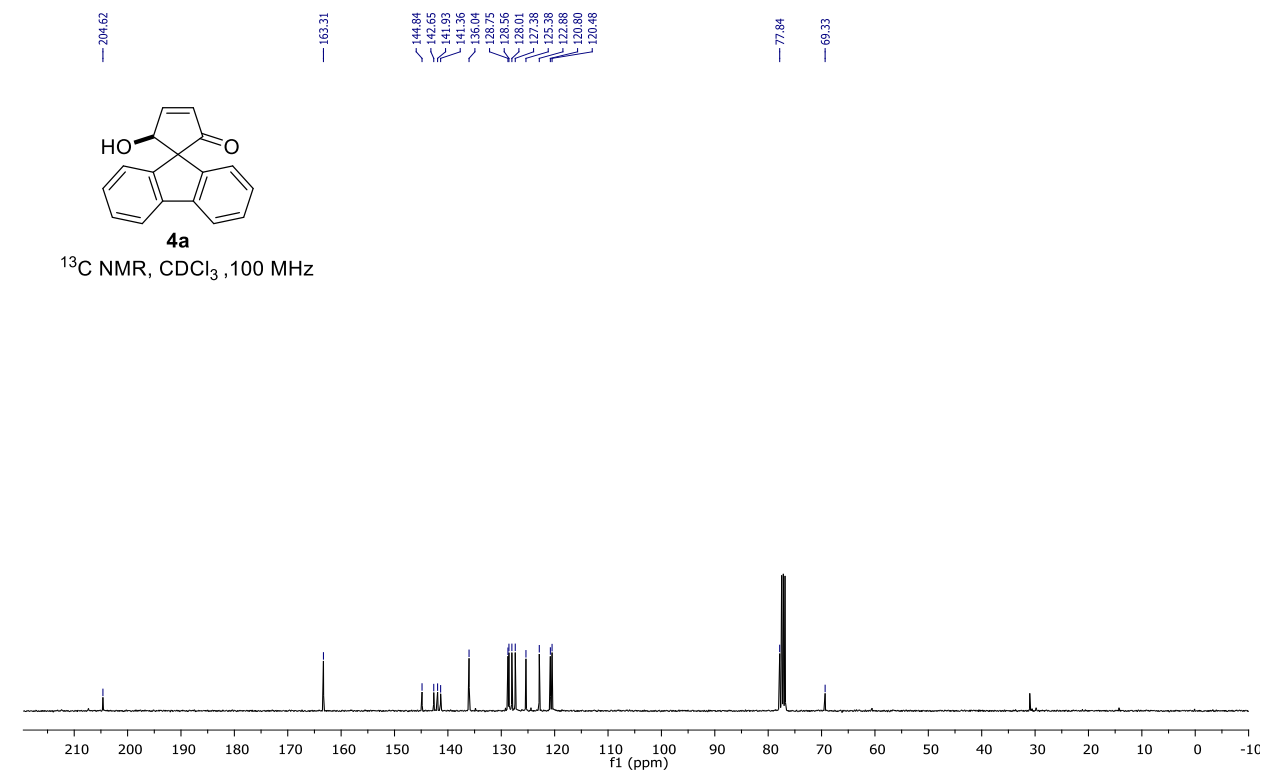

## 2-Hydroxyspiro[cyclopentane-1,9'-xanthen]-3-en-5-one (4b)

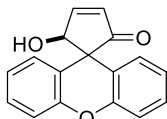

**4b**

$^1\text{H NMR}$ ,  $\text{CDCl}_3$ , 500 MHz

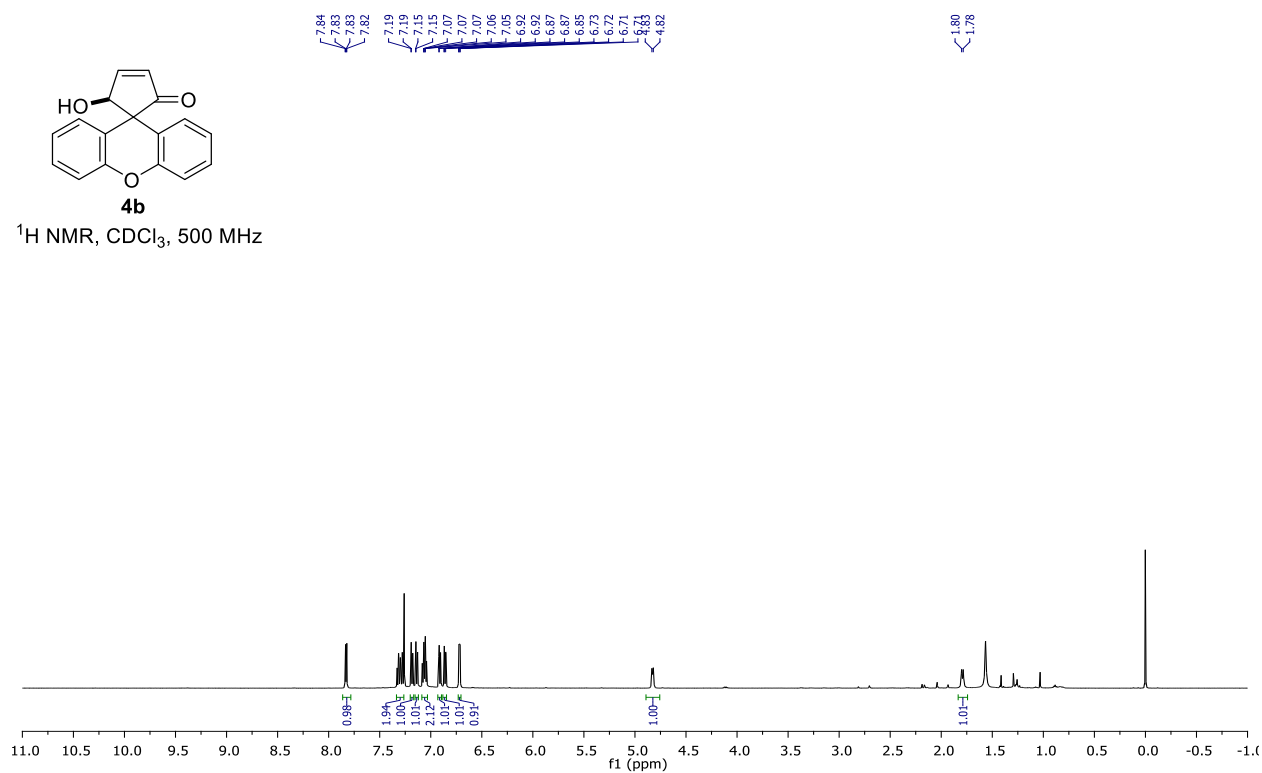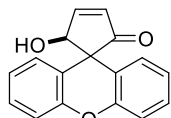

**4b**

$^{13}\text{C NMR}$ ,  $\text{CDCl}_3$ , 100 MHz

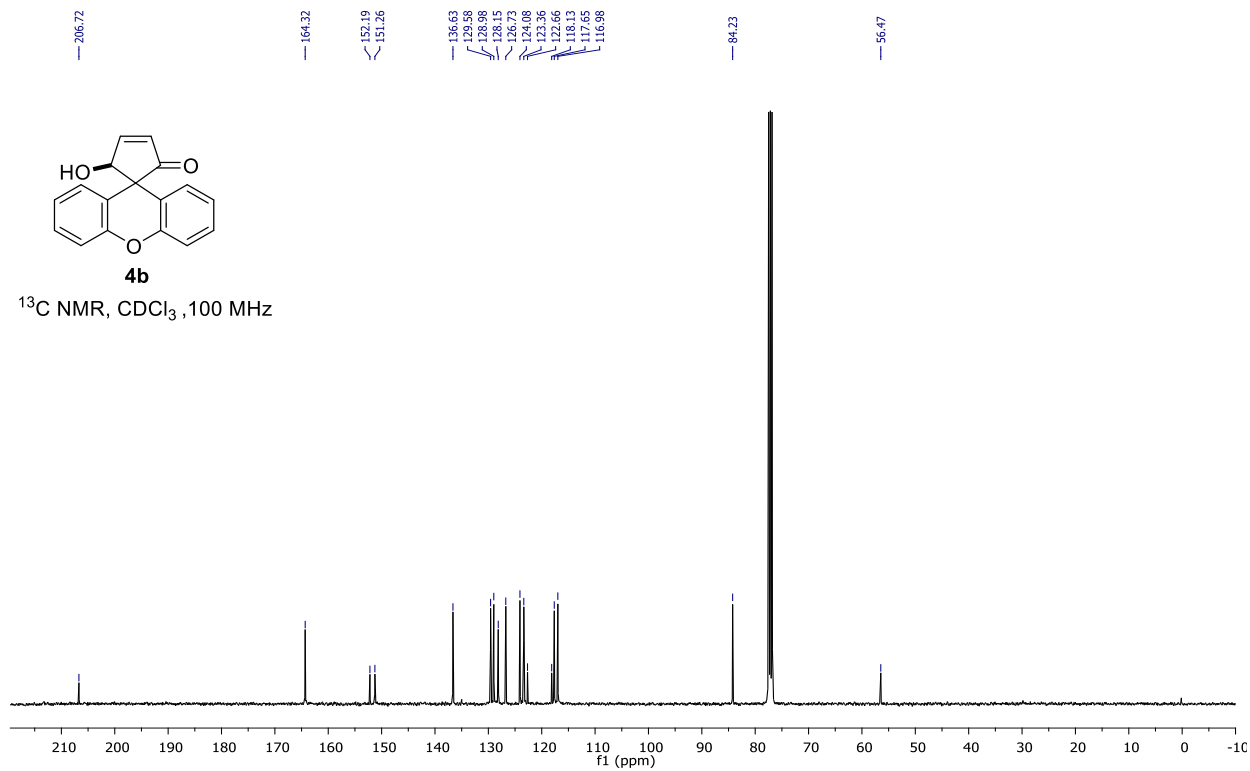



## 2-Hydroxyspiro[cyclopentane-1,9'-thioxanthen]-3-en-5-one (4c)

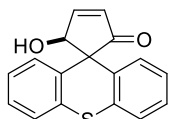

4c

$^1\text{H NMR}$ ,  $\text{CDCl}_3$ , 500 MHz

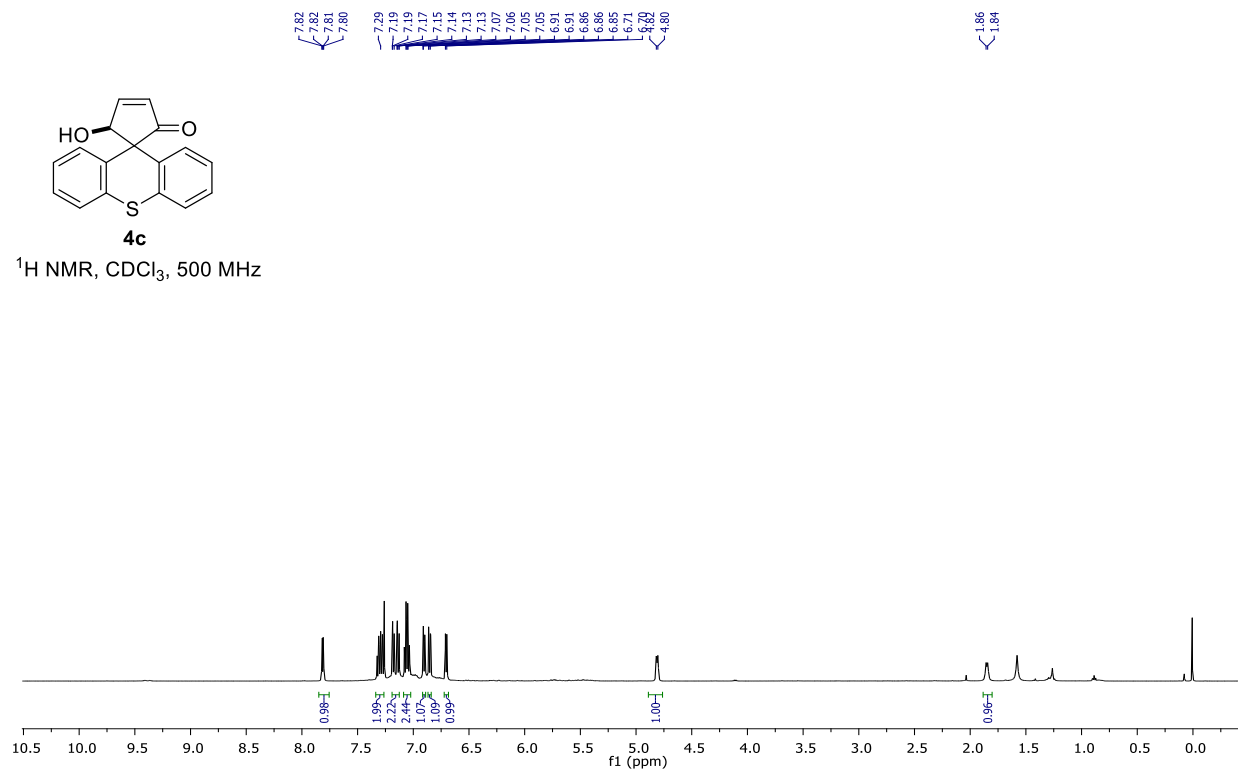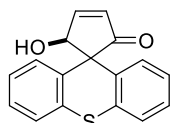

4c

$^{13}\text{C NMR}$ ,  $\text{CDCl}_3$ , 100 MHz

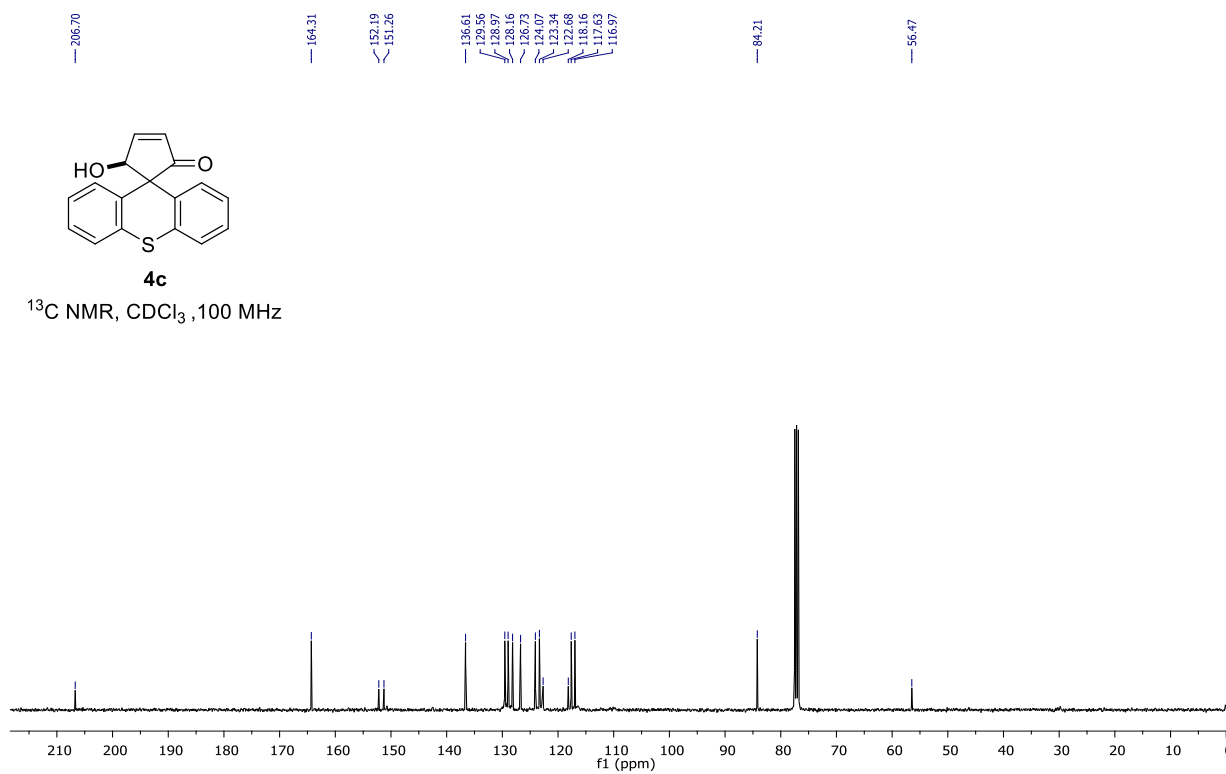

# 5-(Phenylamino)spiro[cyclopentane-1,9'-thioxanthen]-3-en-2-one (6b)

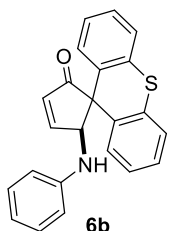

<sup>1</sup>H NMR, CDCl<sub>3</sub>, 500 MHz

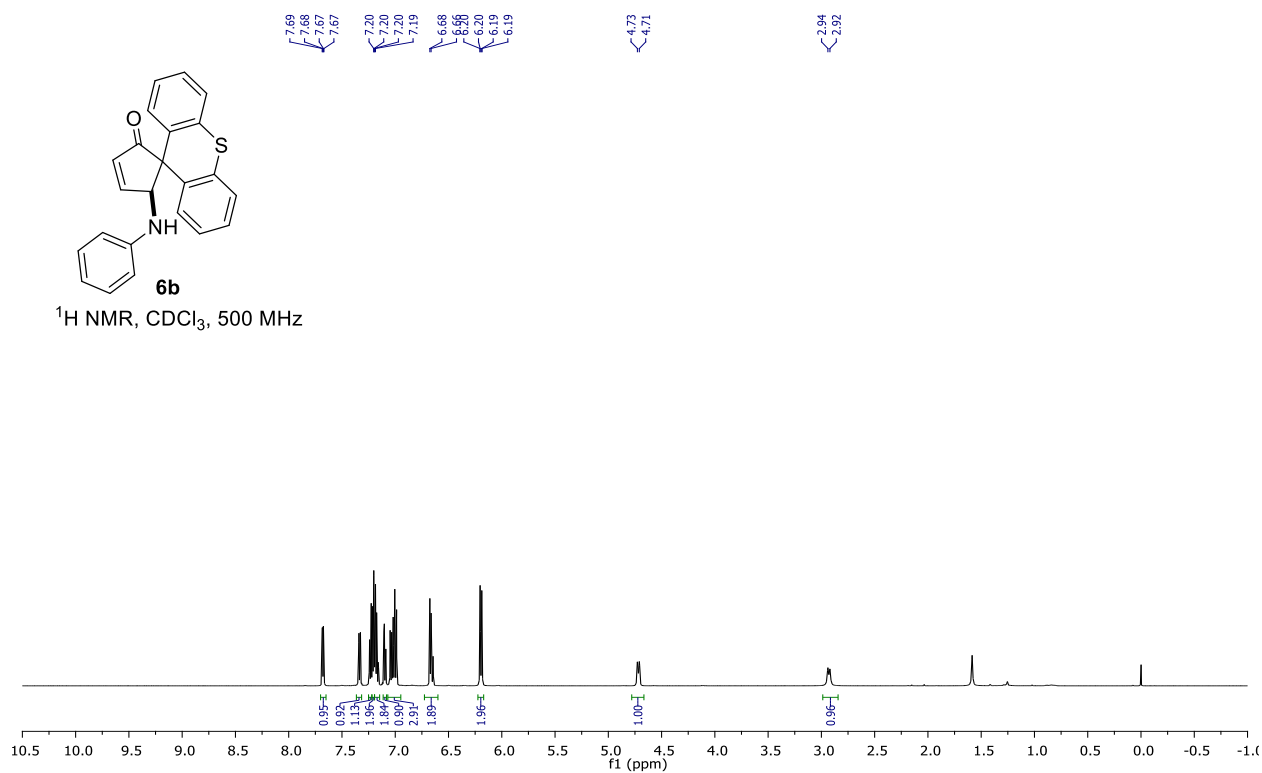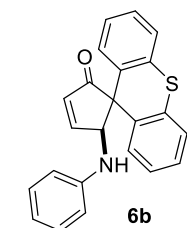

<sup>13</sup>C NMR, CDCl<sub>3</sub>, 100 MHz

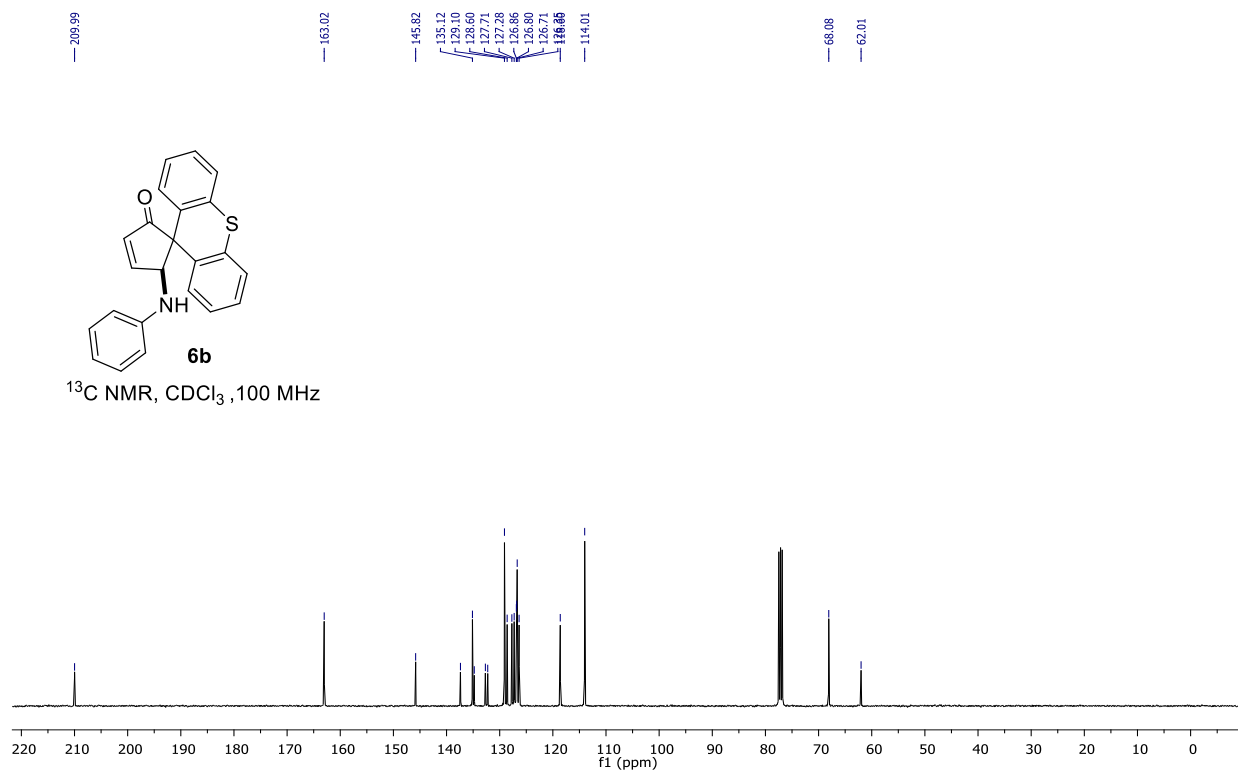

# 5-(*p*-Tolylamino)spiro[cyclopentane-1,9'-thioxanthen]-3-en-2-one (6c)

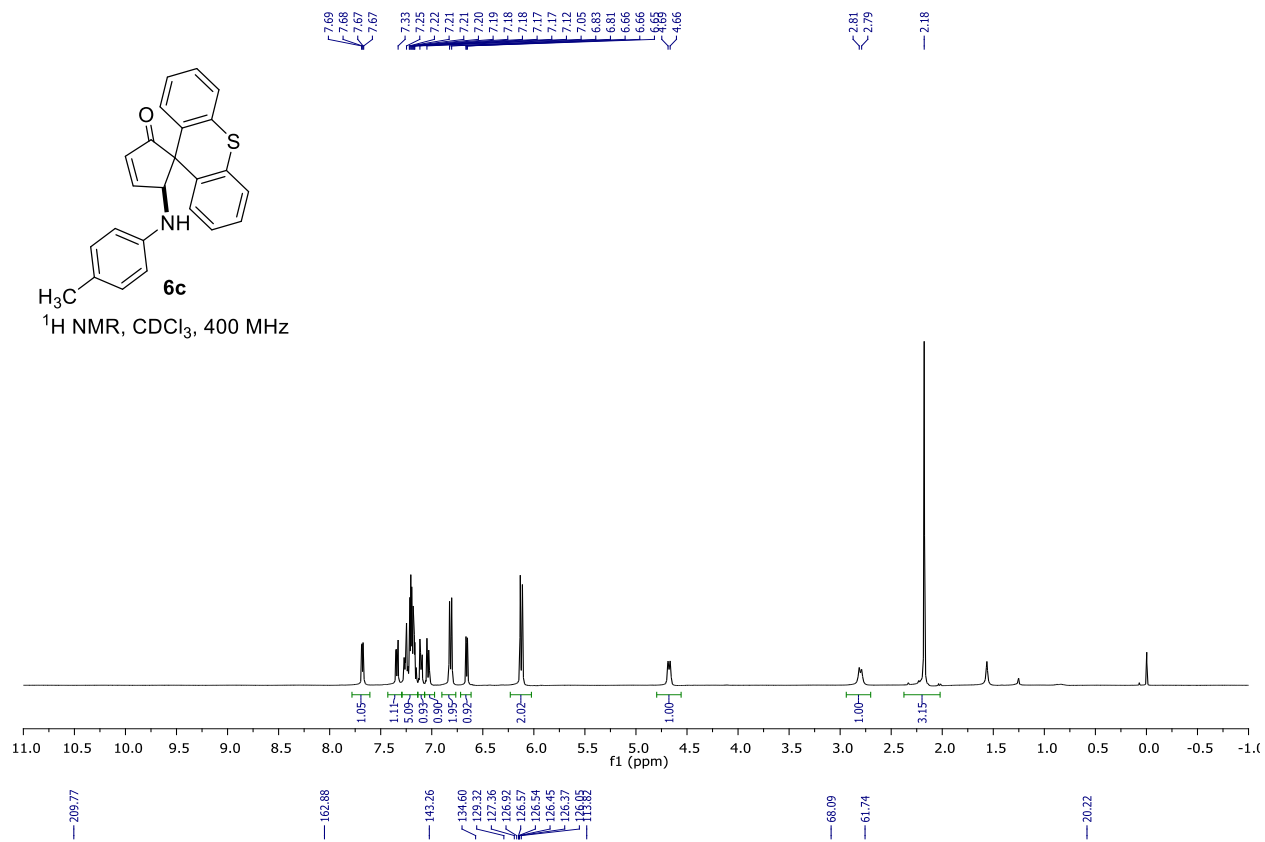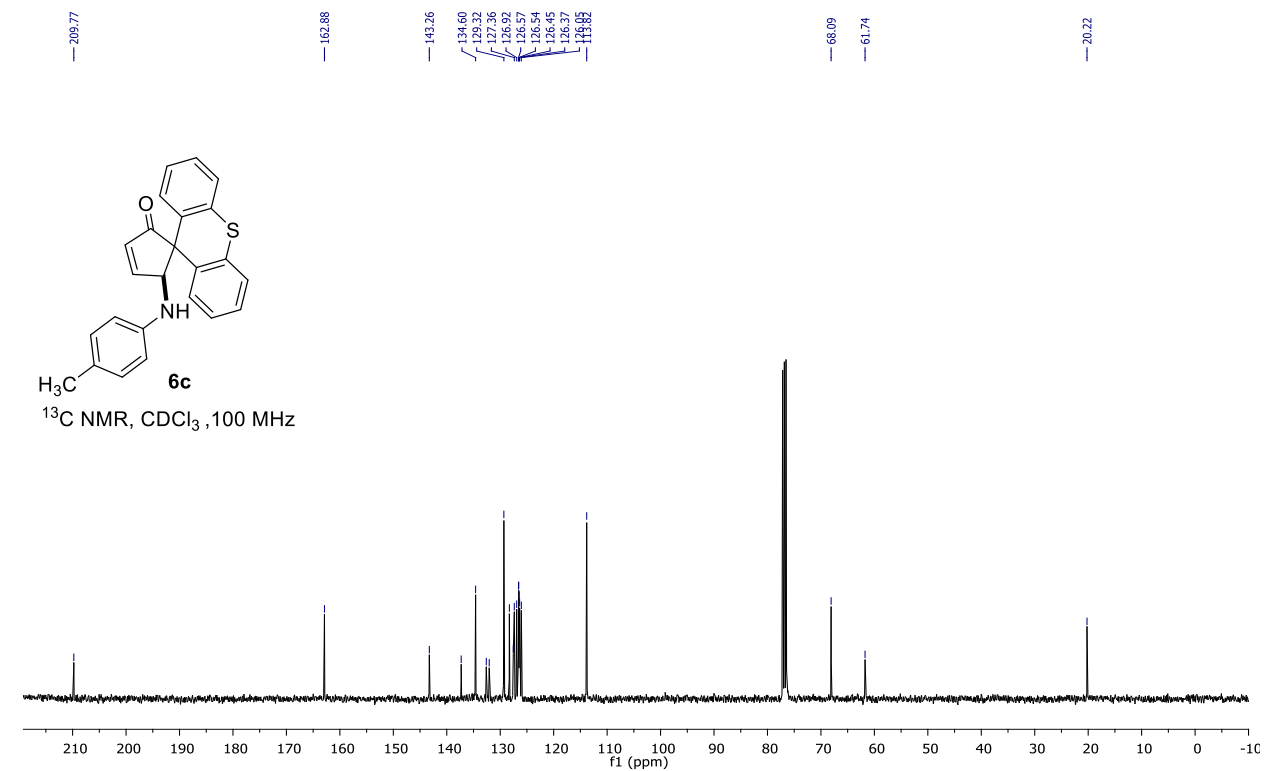

**2-((4-Bromophenyl)amino)spiro[cyclopentane-1,9'-thioxanthen]-3-en-5-one (6d)**

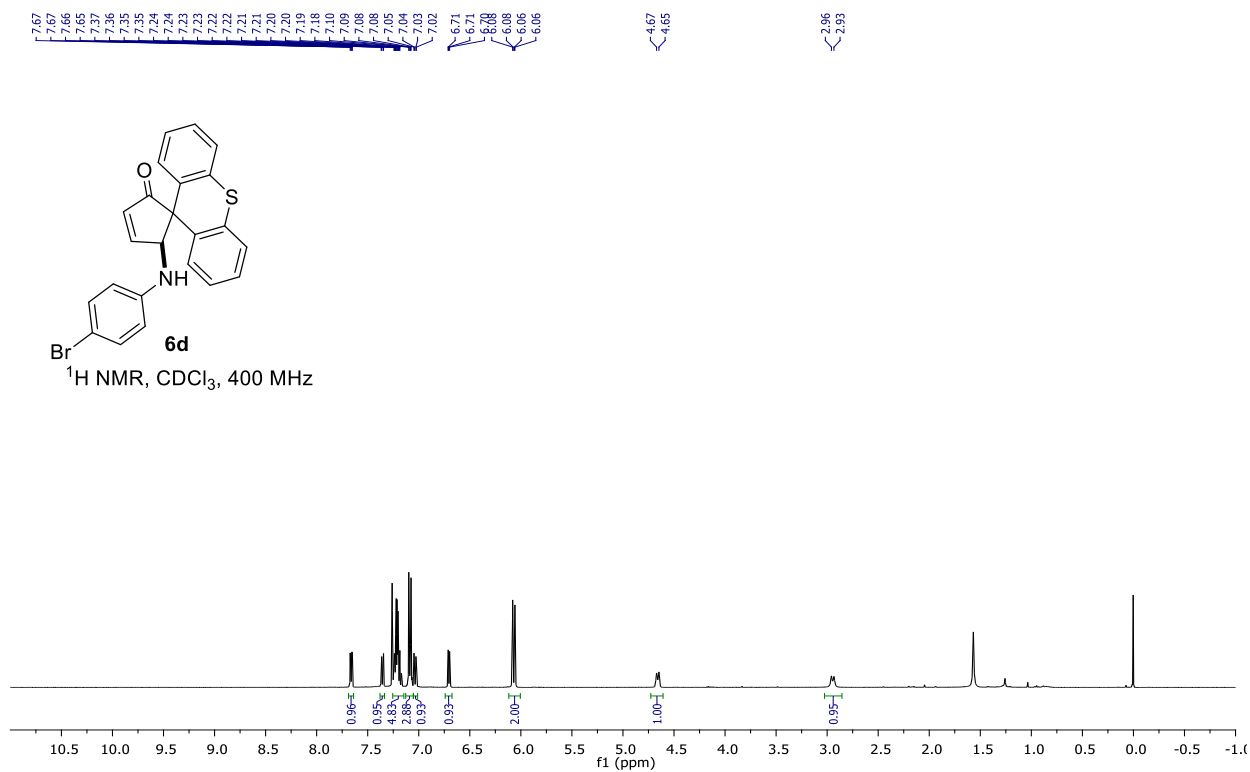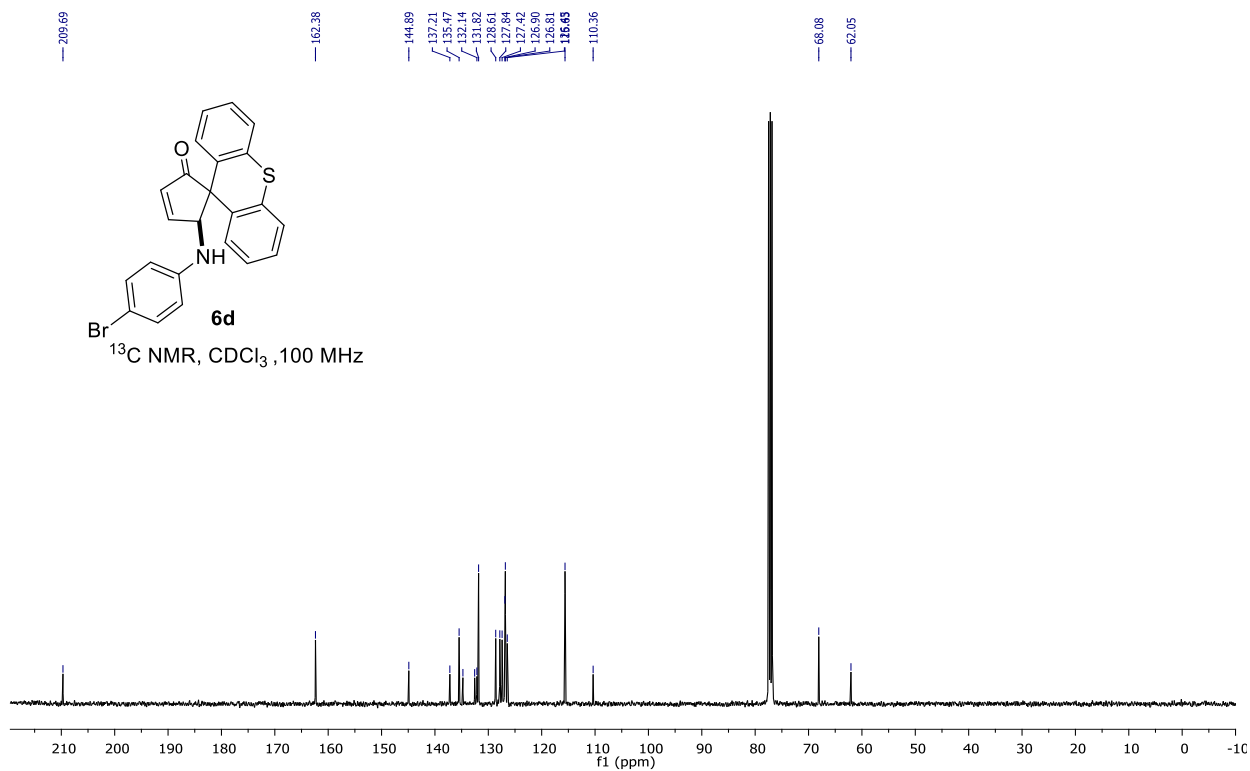

**2-((3-Chlorophenyl)amino)spiro[cyclopentane-1,9'-thioxanthen]-3-en-5-one (6e)**

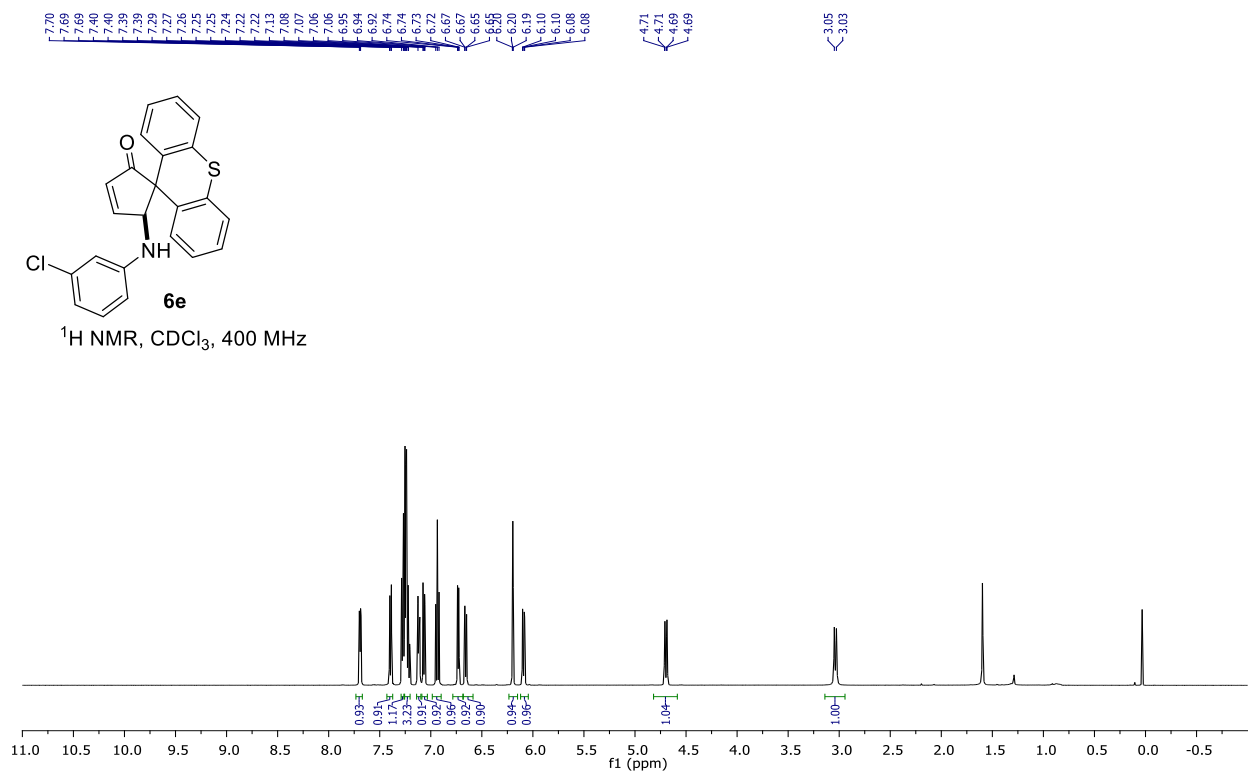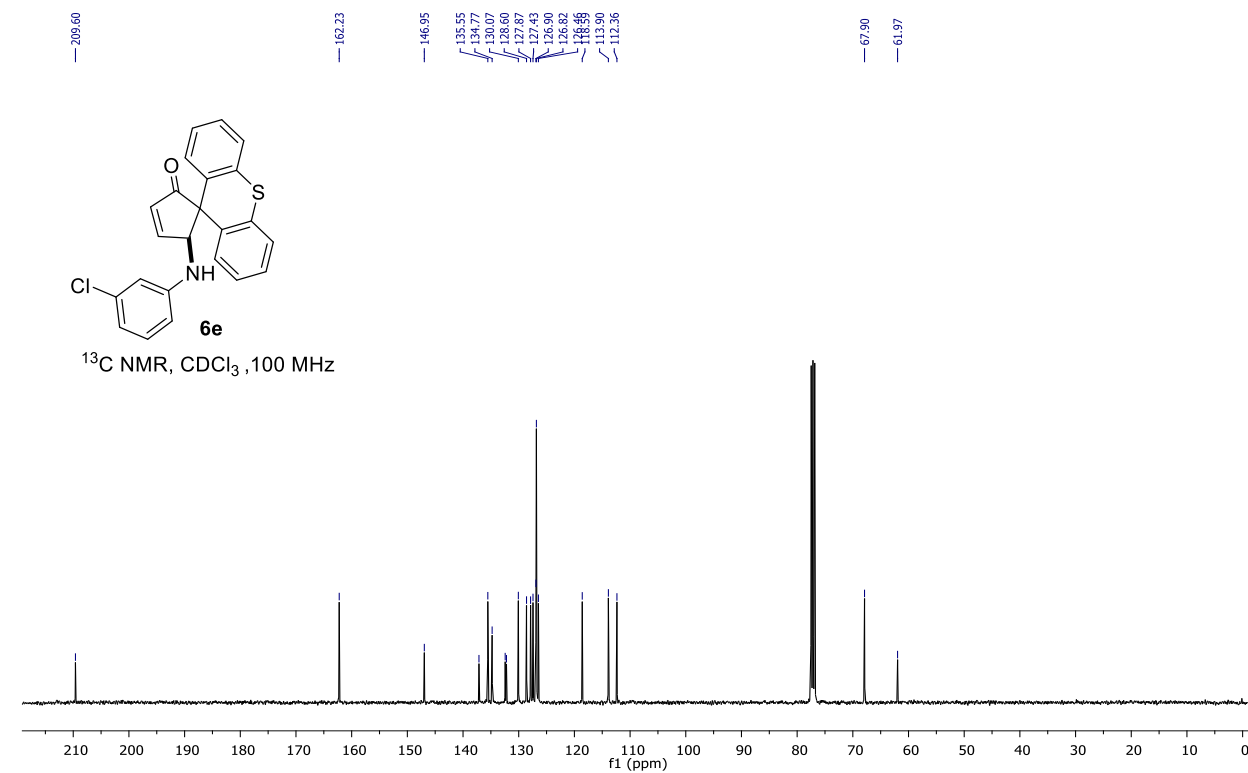

5-((3-(Trifluoromethyl)phenyl)amino)spiro[cyclopentane-1,9'-thioxanthen]-3-en-2-one (6f)

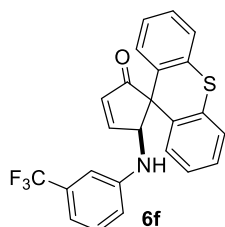

$^1\text{H NMR}$ ,  $\text{CDCl}_3$ , 500 MHz

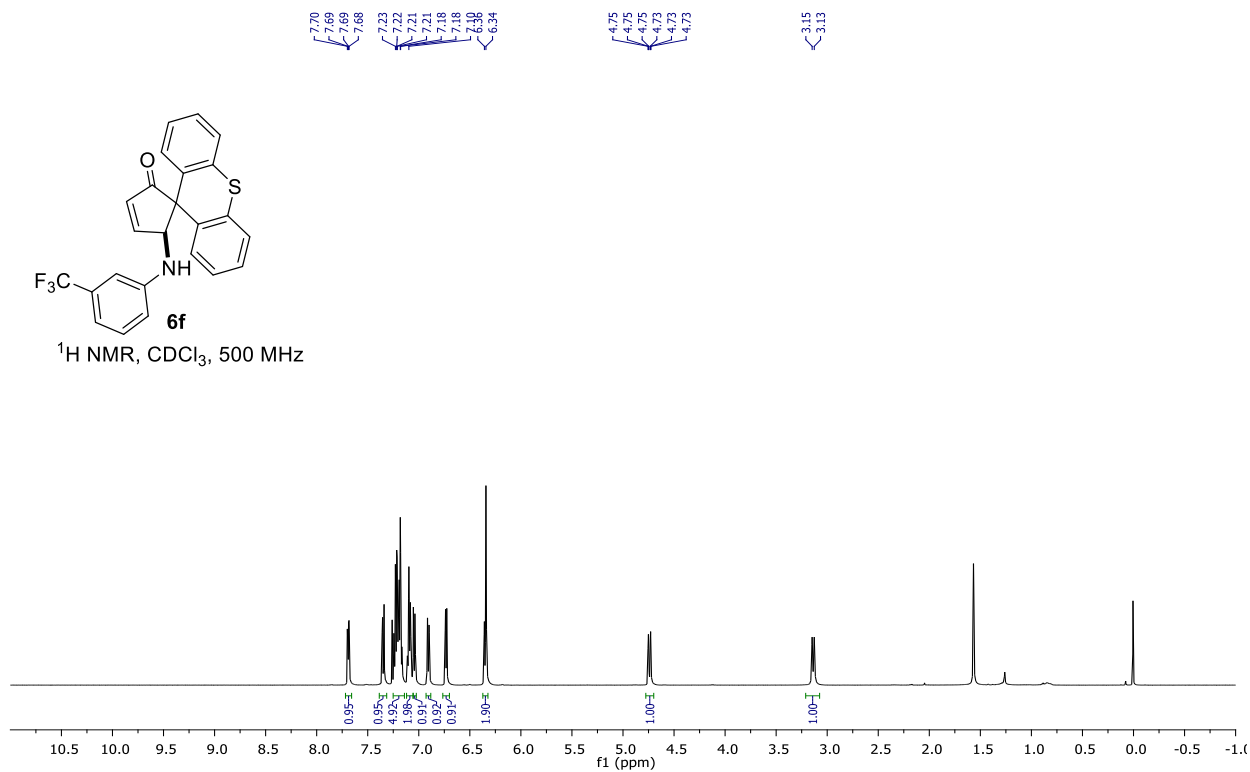

Chemical shift (ppm): 209.57, 162.11, 146.04, 135.79, 129.49, 129.43, 127.83, 127.48, 126.96, 126.84, 126.76, 116.47, 115.78, 110.67, 68.13, 62.11.

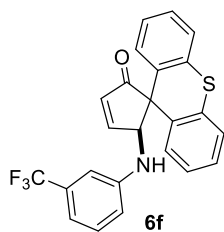

$^{13}\text{C NMR}$ ,  $\text{CDCl}_3$ , 100 MHz

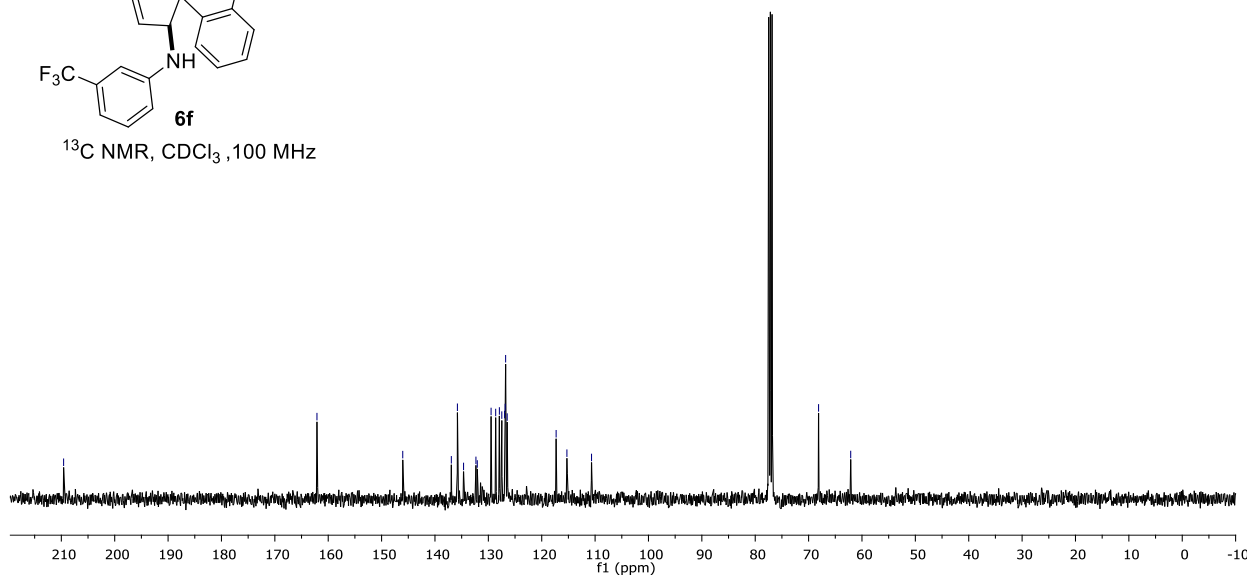

# <sup>19</sup>F Spectrum of compound **6f**

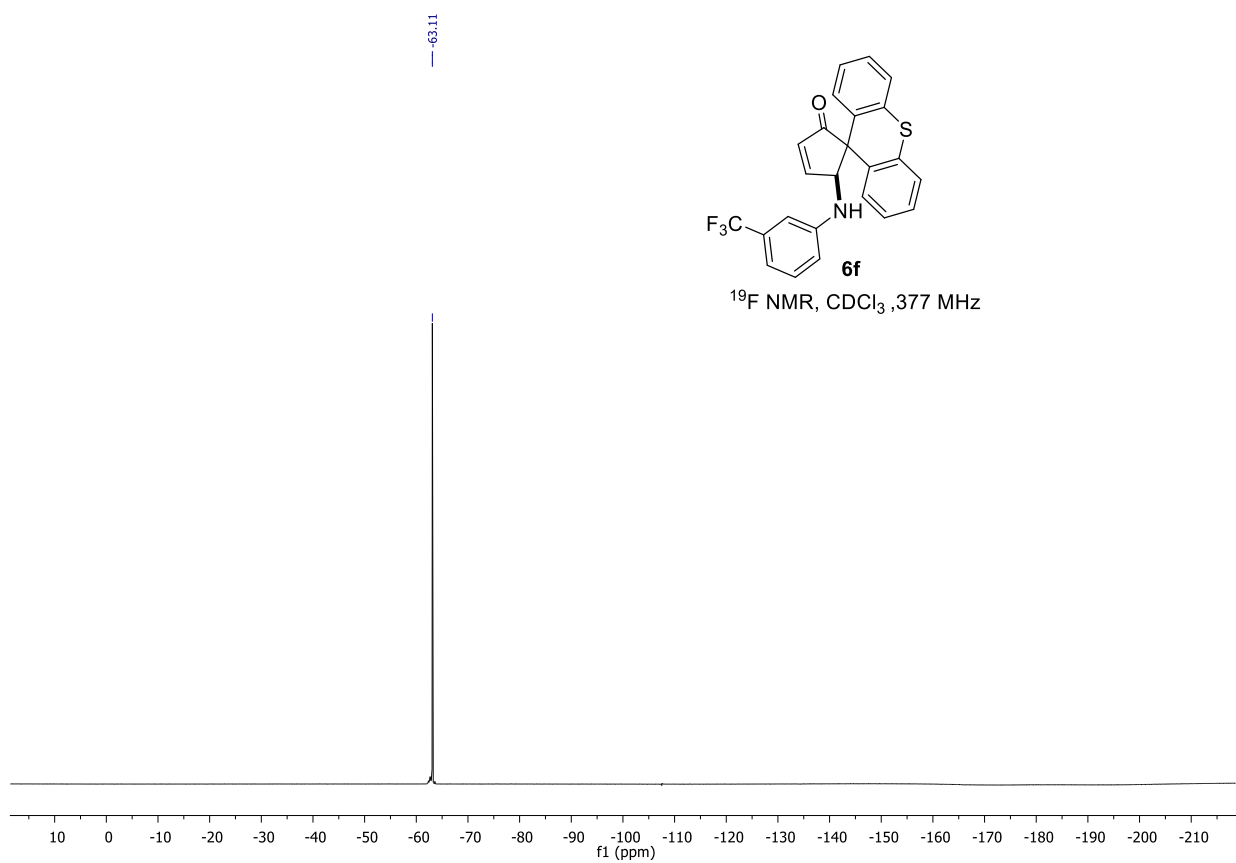

**2-((4-Methoxyphenyl)amino)spiro[cyclopentane-1,9'-fluoren]-3-en-5-one (6g)**

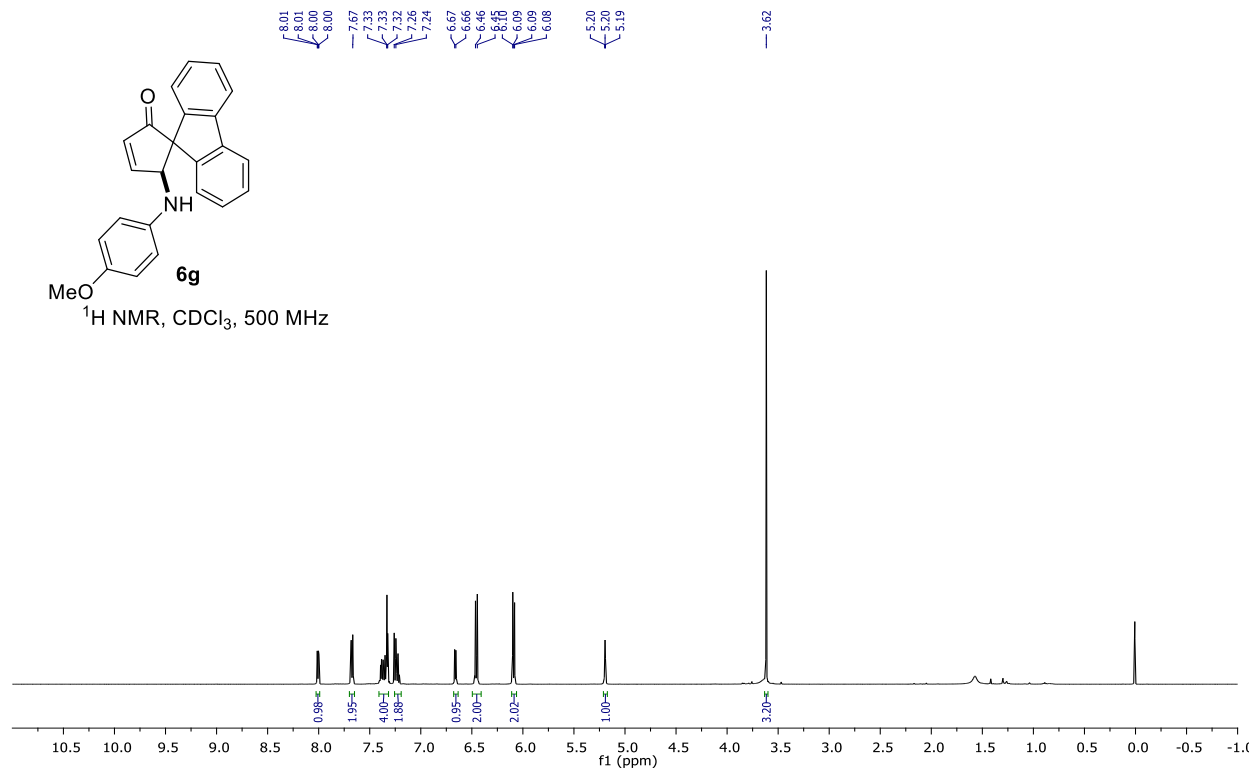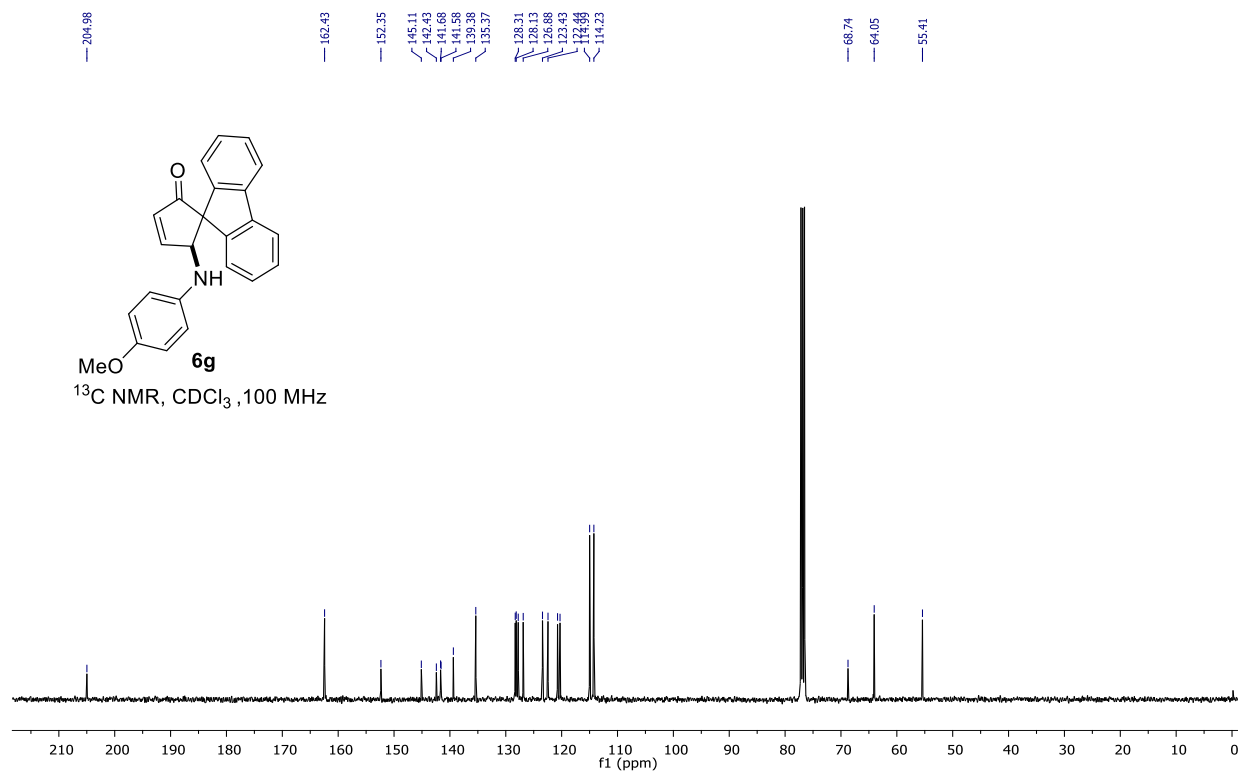



## 2-((4-Chlorophenyl)amino)spiro[cyclopentane-1,9'-fluorene]-3-en-5-one (6h)

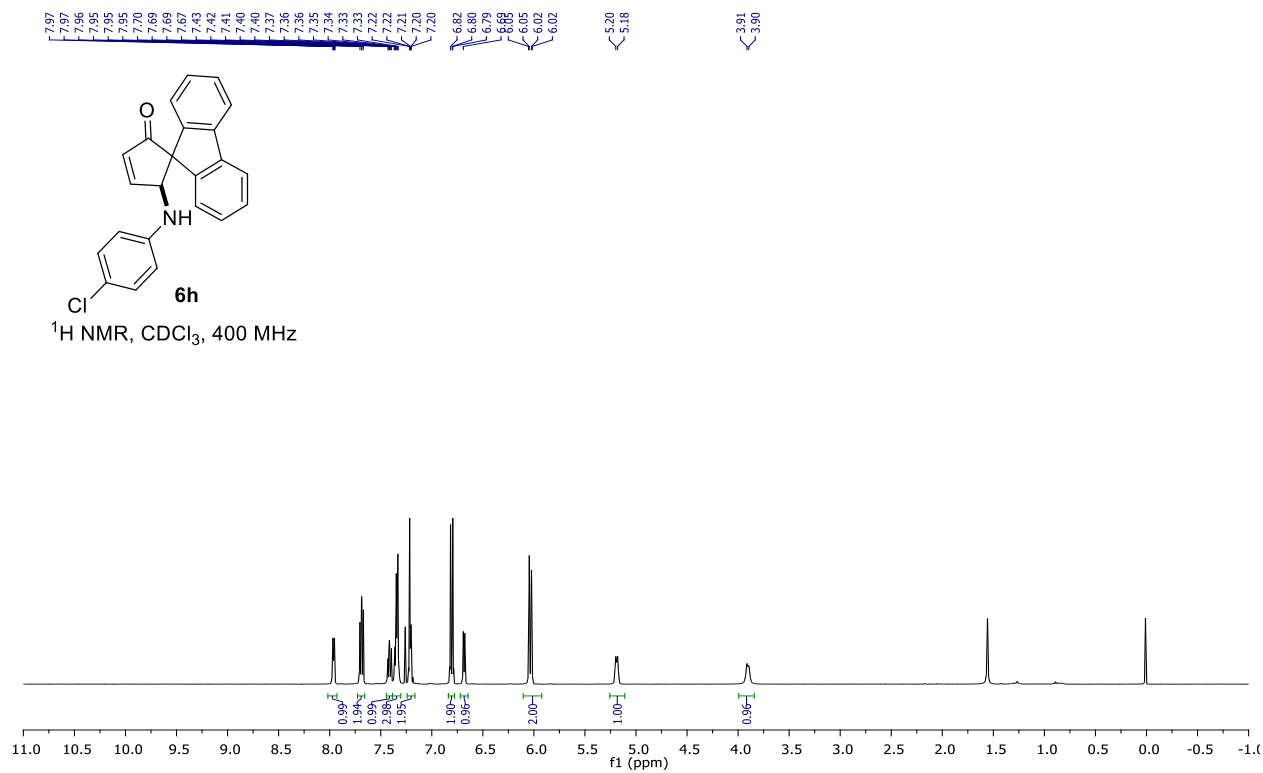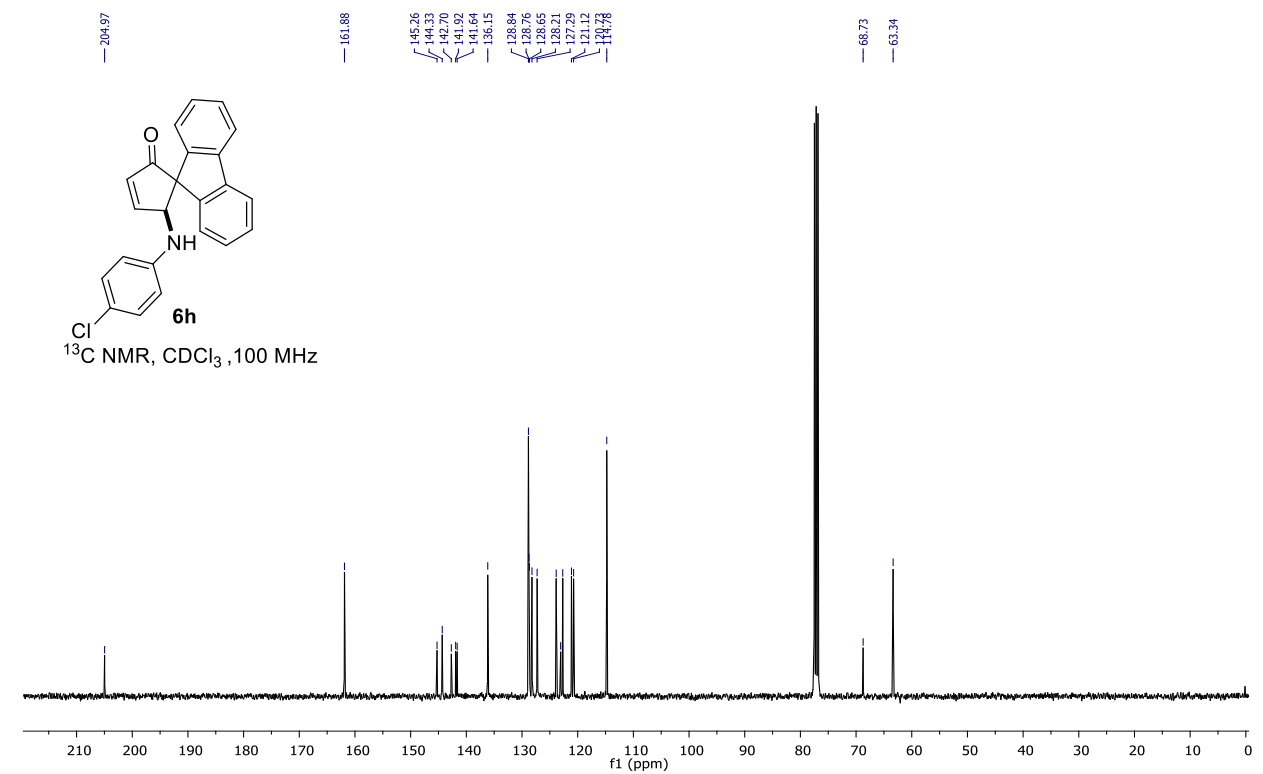

2-((4-Bromophenyl)amino)spiro[cyclopentane-1,9'-fluoren]-3-en-5-one (6i)

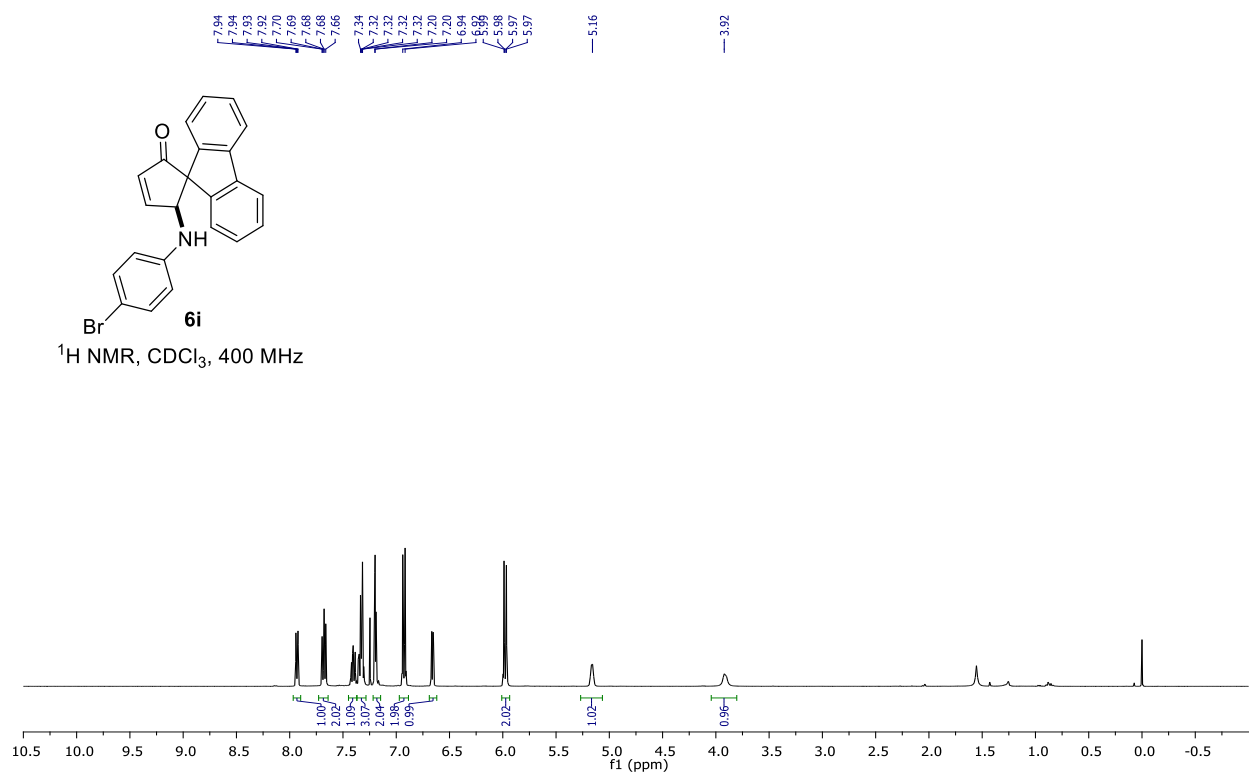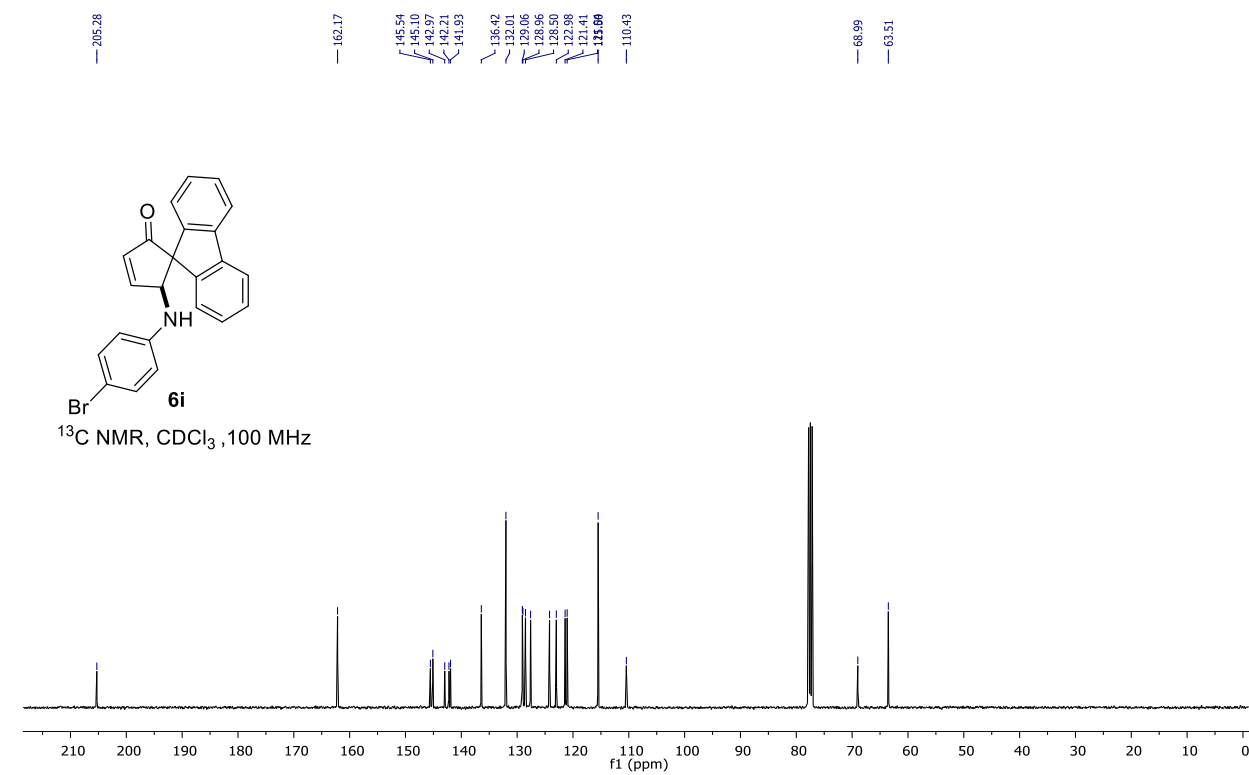

5-((3-(Trifluoromethyl)phenyl)amino)spiro[cyclopentane-1,9'-fluoren]-3-en-2-one (6j)

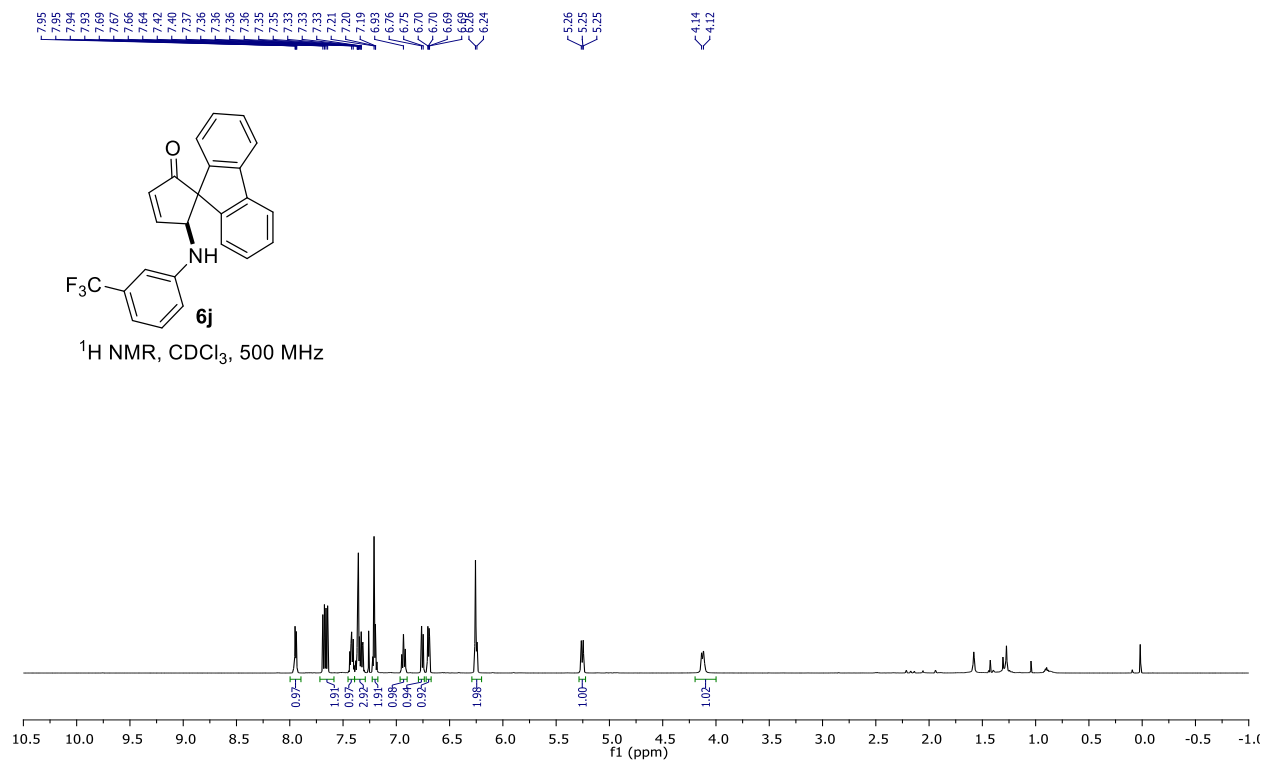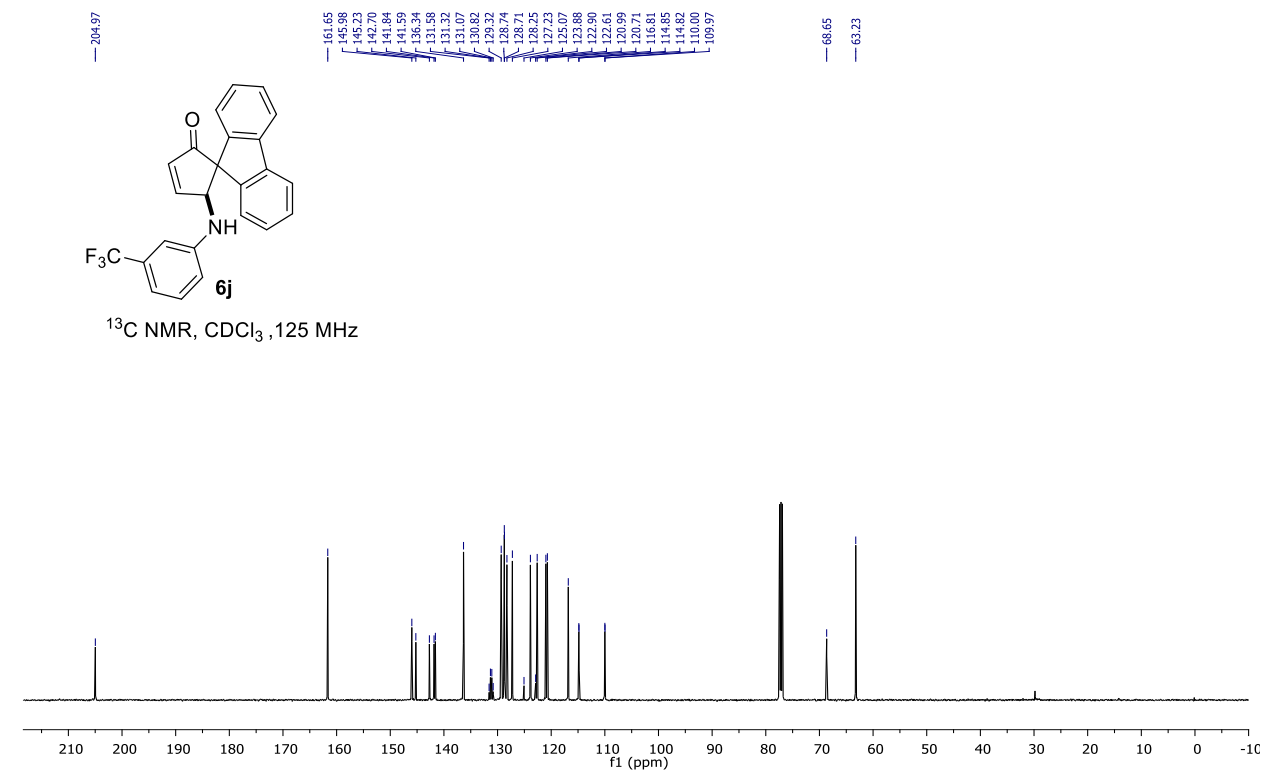

# <sup>19</sup>F Spectrum of compound 6j

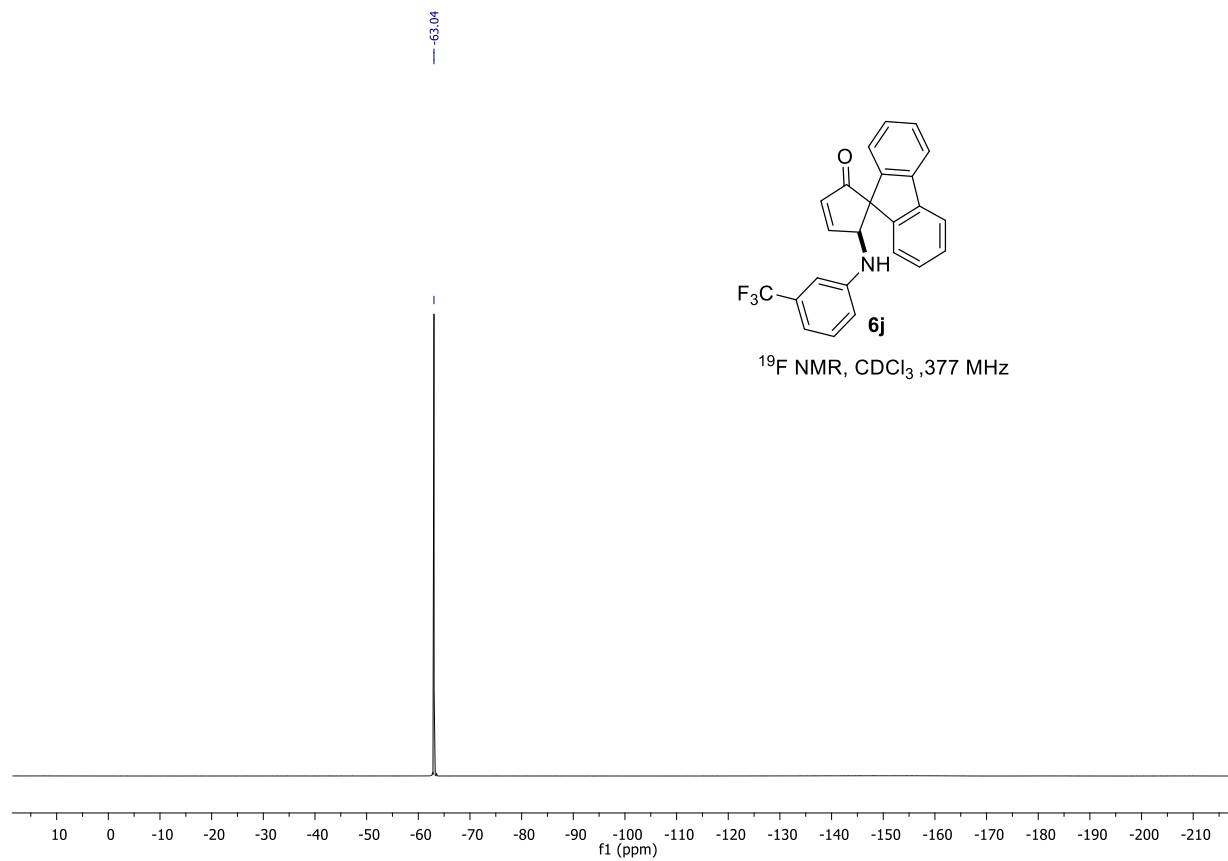

## 2-((4-Bromophenyl)amino)spiro[cyclopentane-1,9'-xanthen]-3-en-5-one (6k)

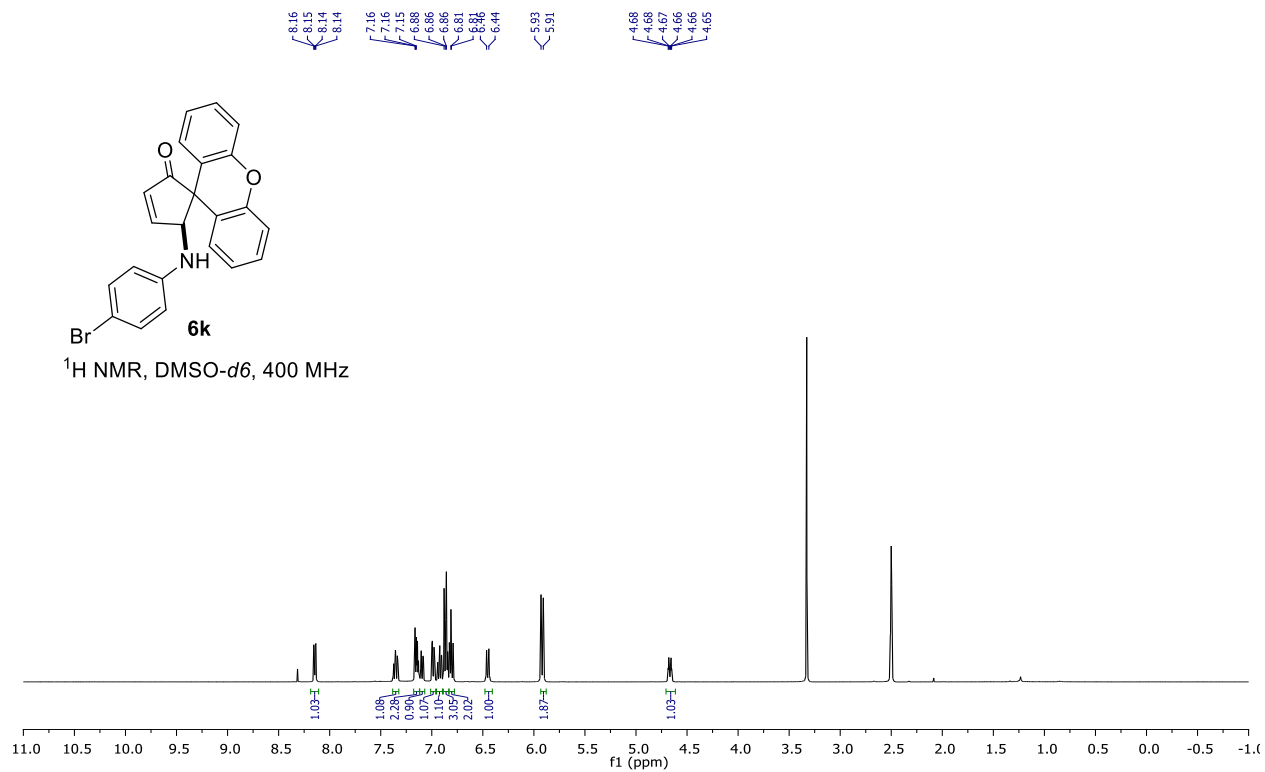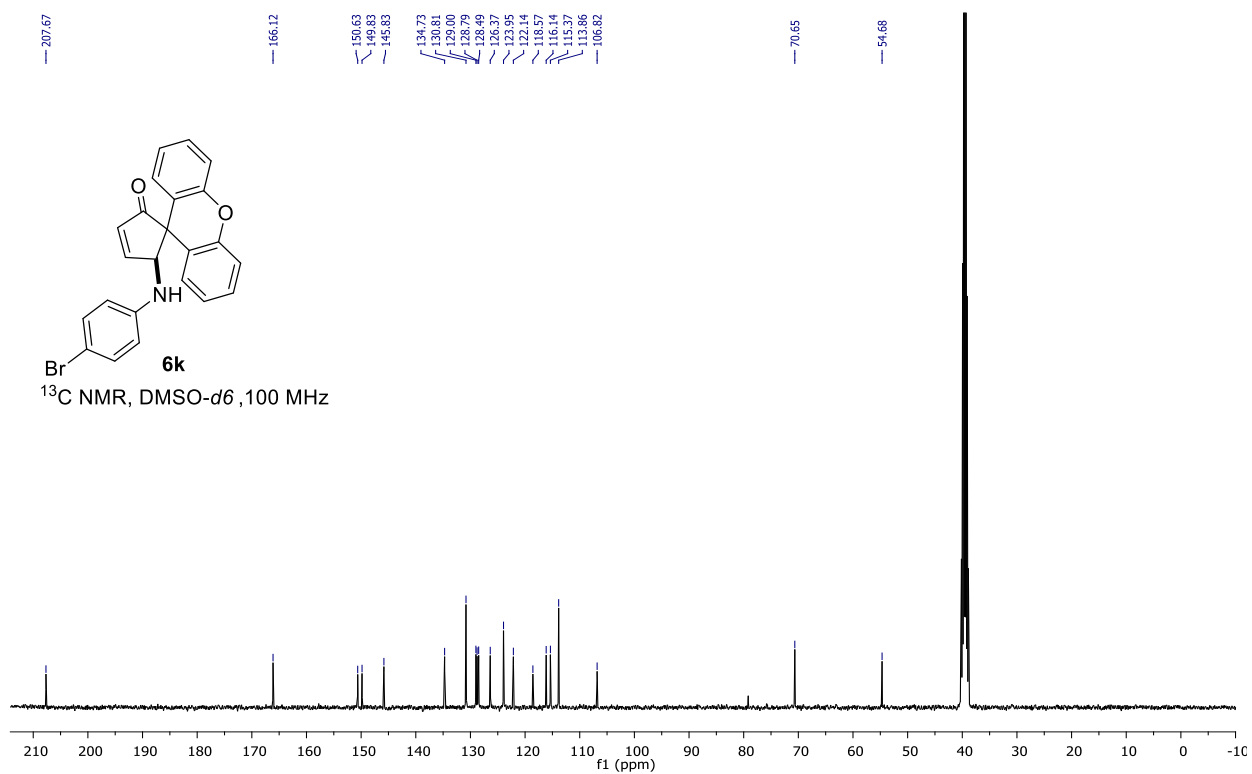

2-((2-Isopropylphenyl)amino)spiro[cyclopentane-1,9'-xanthen]-3-en-5-one (6l)

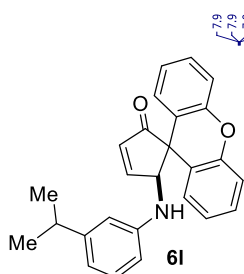

<sup>1</sup>H NMR, CDCl<sub>3</sub>, 500MHz

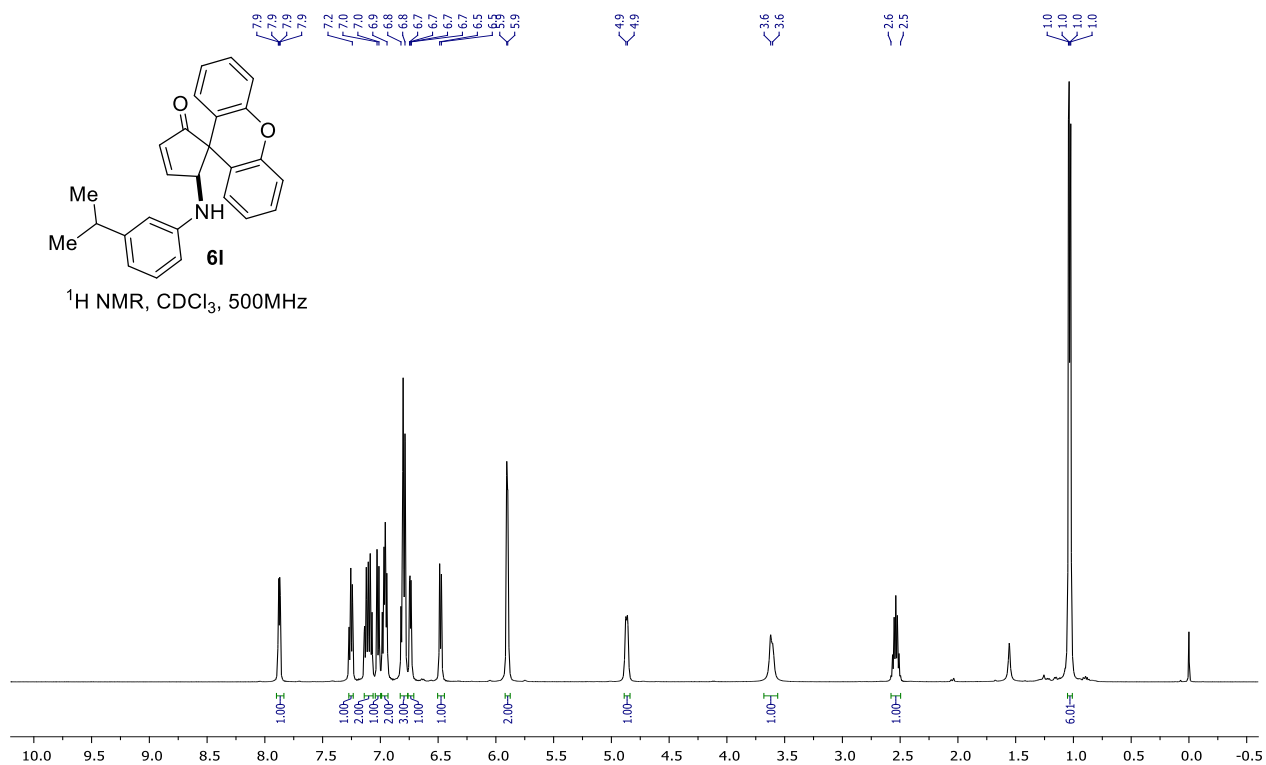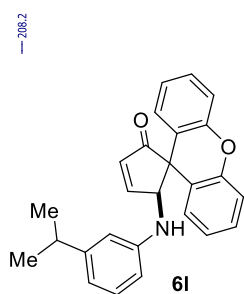

<sup>13</sup>C NMR, CDCl<sub>3</sub>, 100MHz

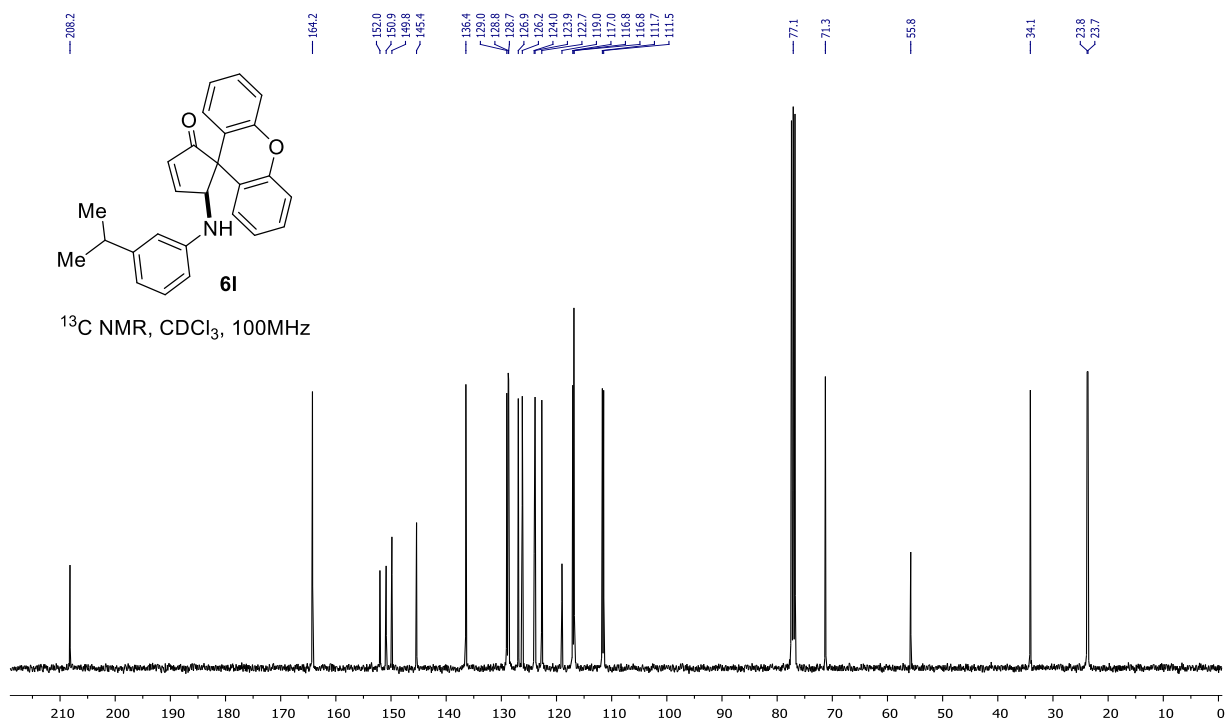

## 2-((2-Oxospiro[cyclopentane-1,9'-xanthen]-3-en-5-yl)amino)benzonitrile (6m)

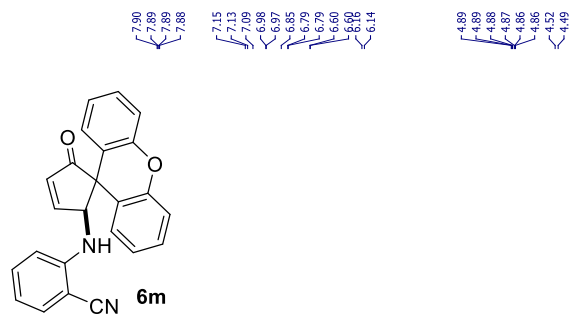

$^1\text{H NMR}$ ,  $\text{CDCl}_3$ , 400MHz

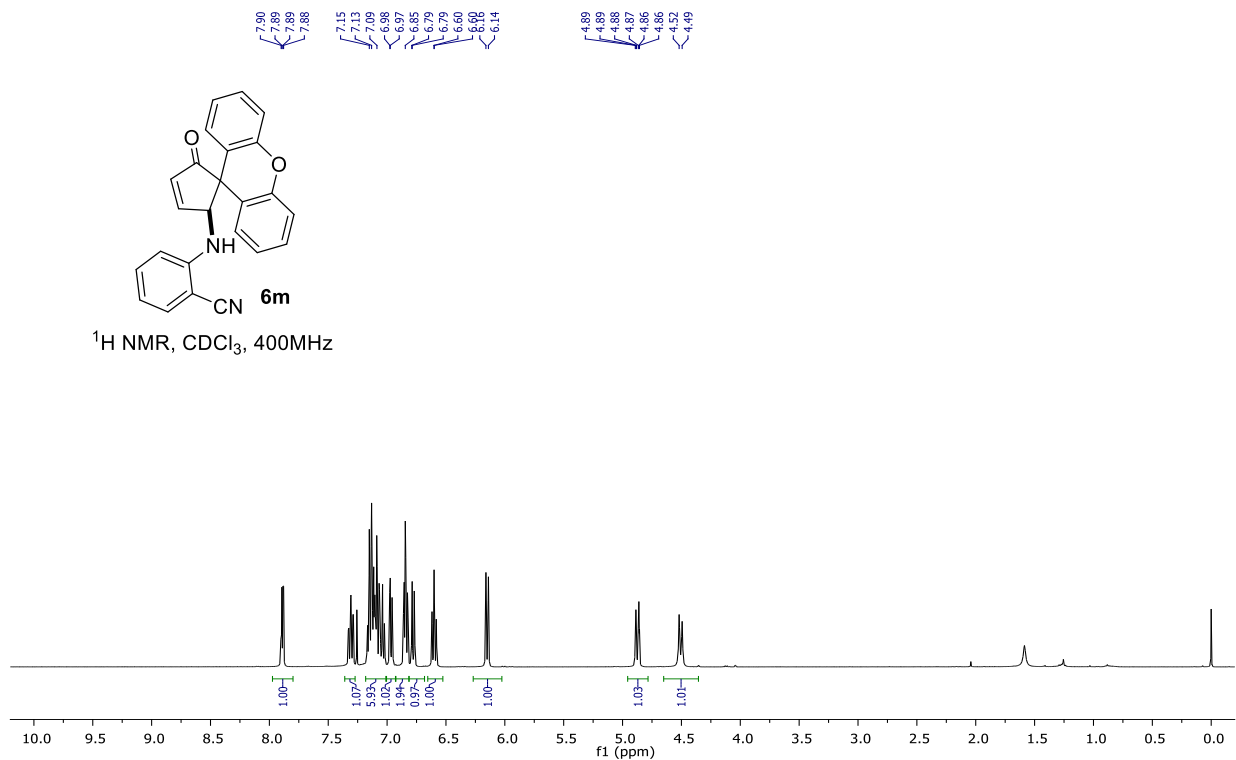

207.29

162.01

151.59

150.83

147.86

137.57

133.72

132.90

129.45

127.36

126.14

124.12

123.80

118.05

116.81

116.57

111.96

96.56

77.07

68.98

55.40

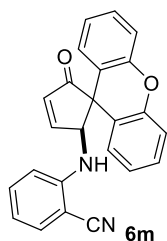

$^{13}\text{C NMR}$ ,  $\text{CDCl}_3$ , 125MHz

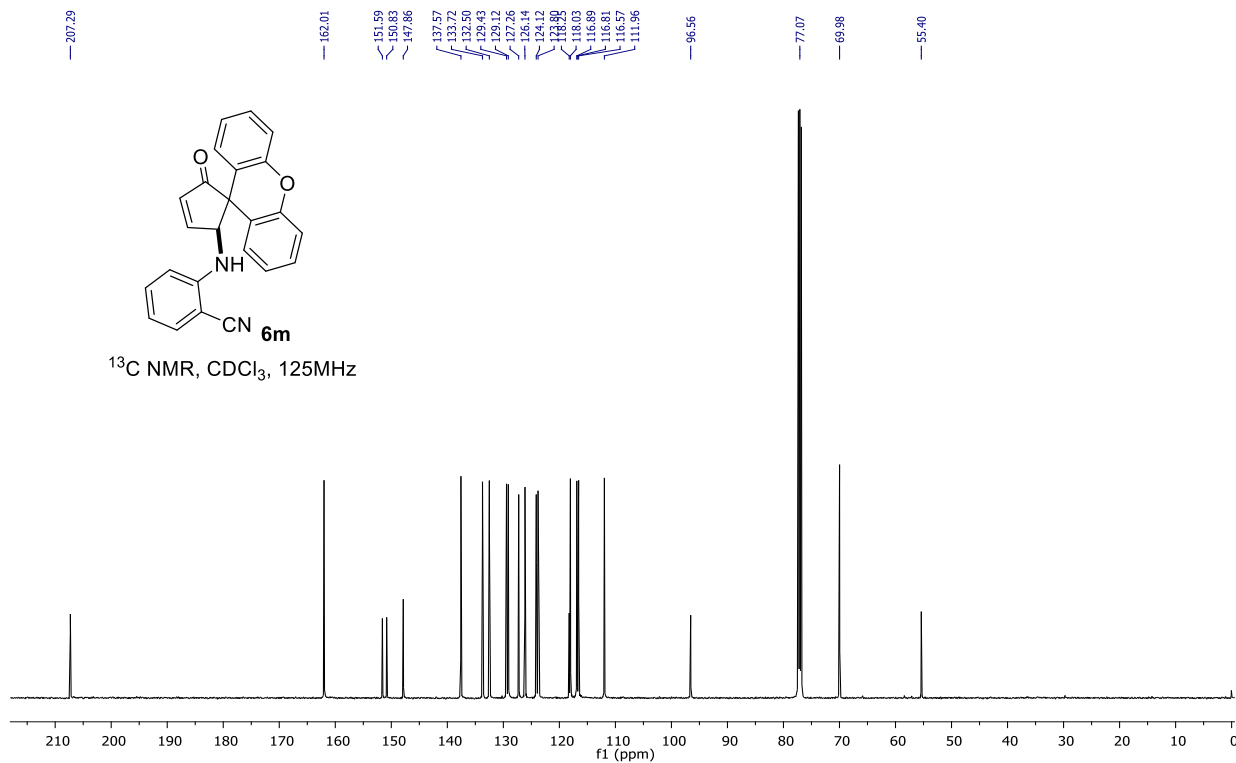

## 2-((3,4-Dimethylphenyl)amino)spiro[cyclopentane-1,9'-xanthen]-3-en-5-one (6n)

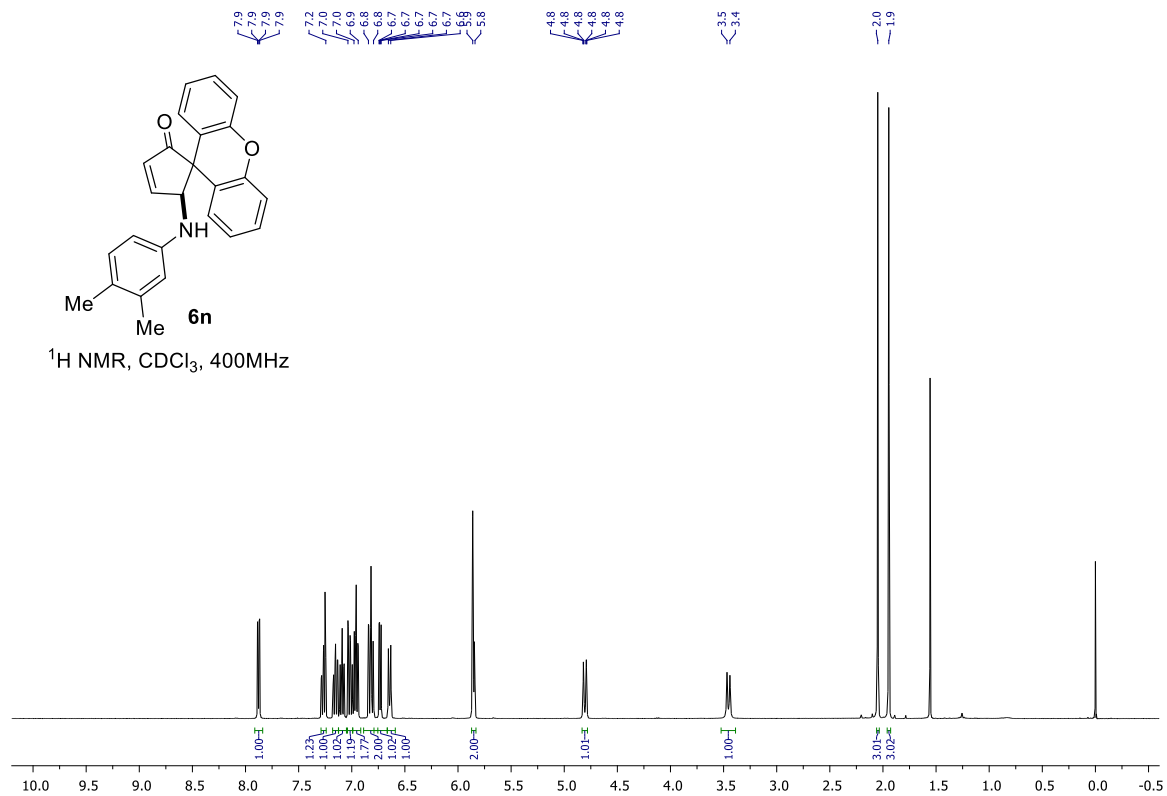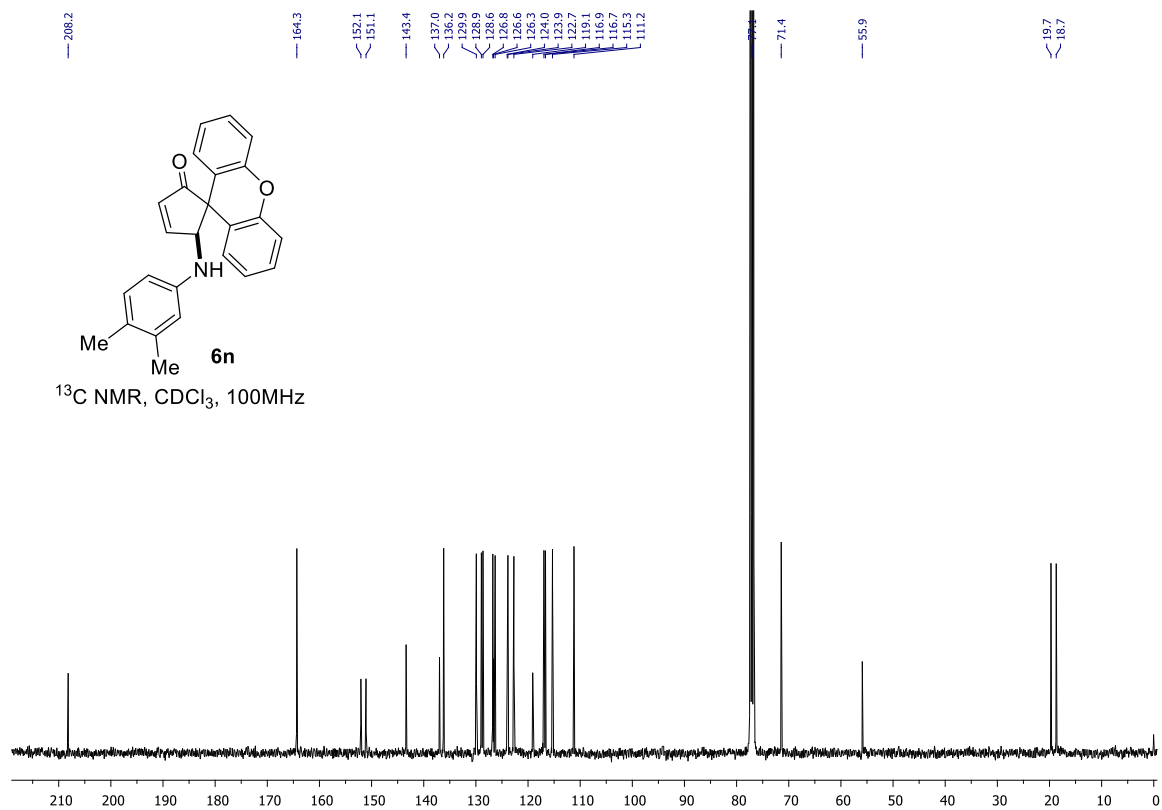



2-((3, 5-Bis(trifluoromethyl)phenyl)amino)spiro[cyclopentane-1,9'-xanthen]-3-en-5-one (6o)

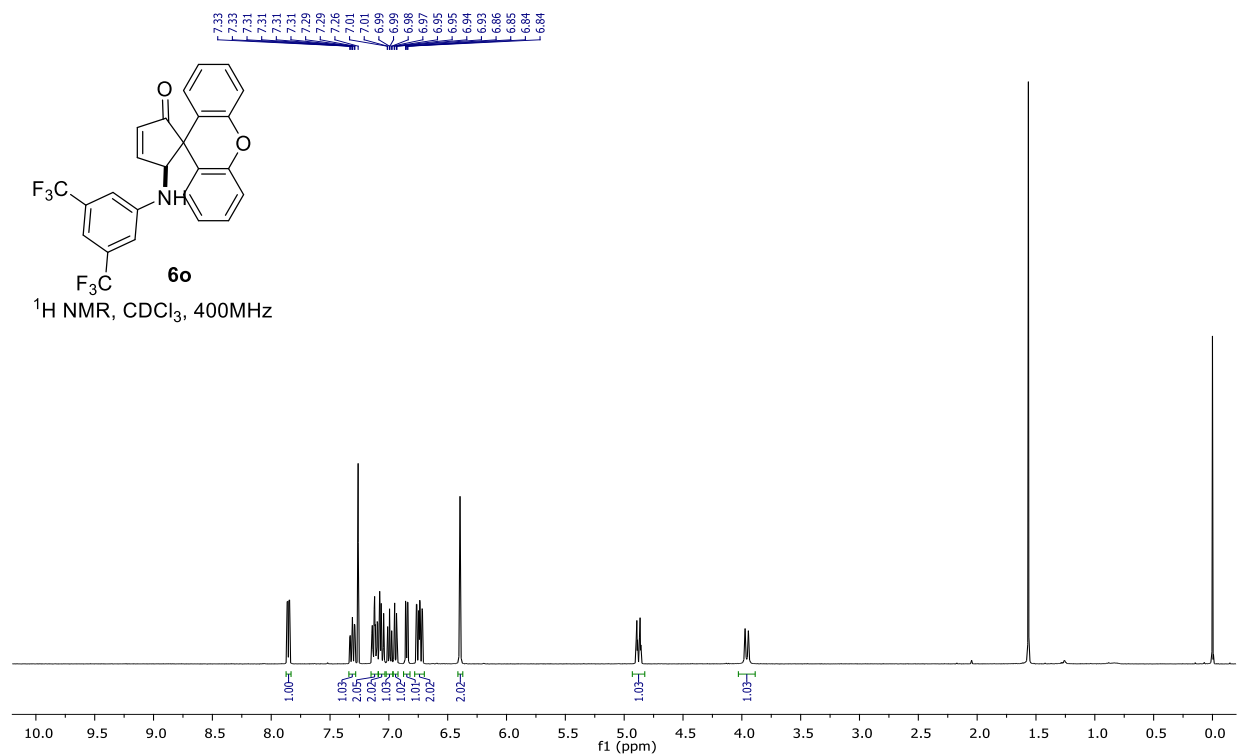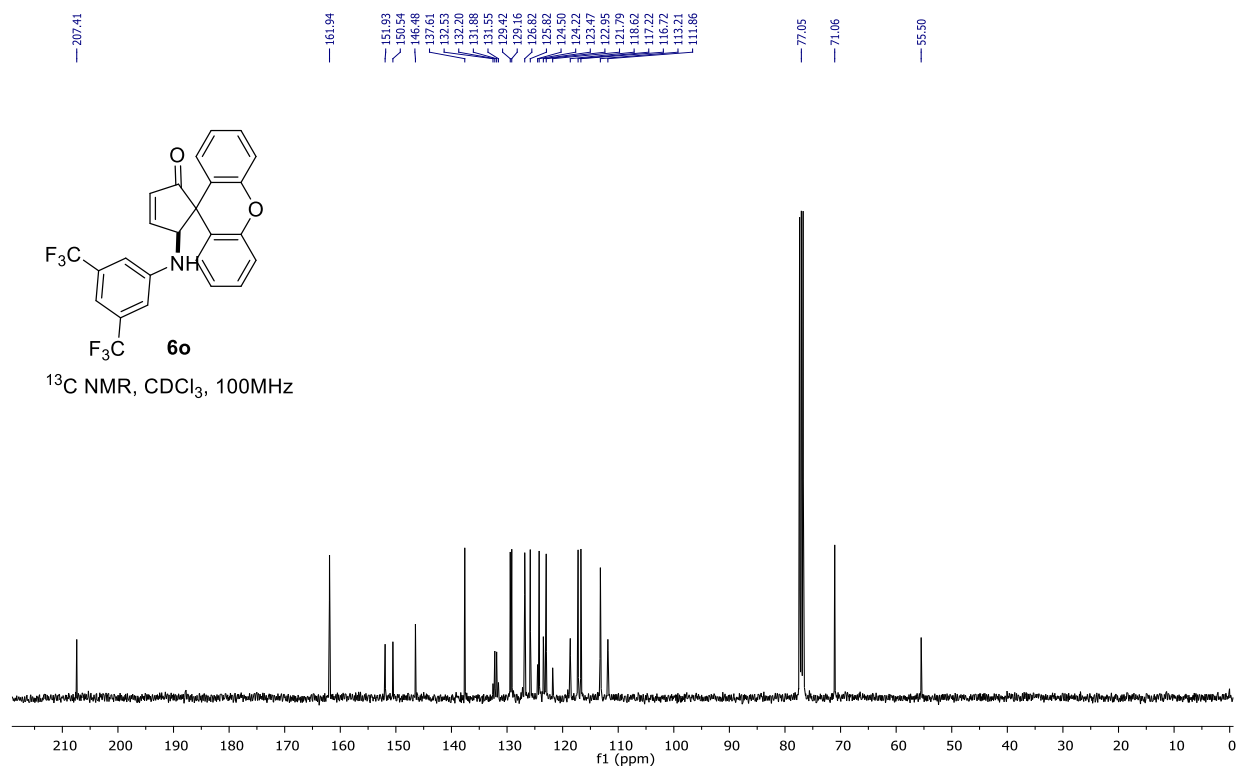

# <sup>19</sup>F Spectrum of compound 6o

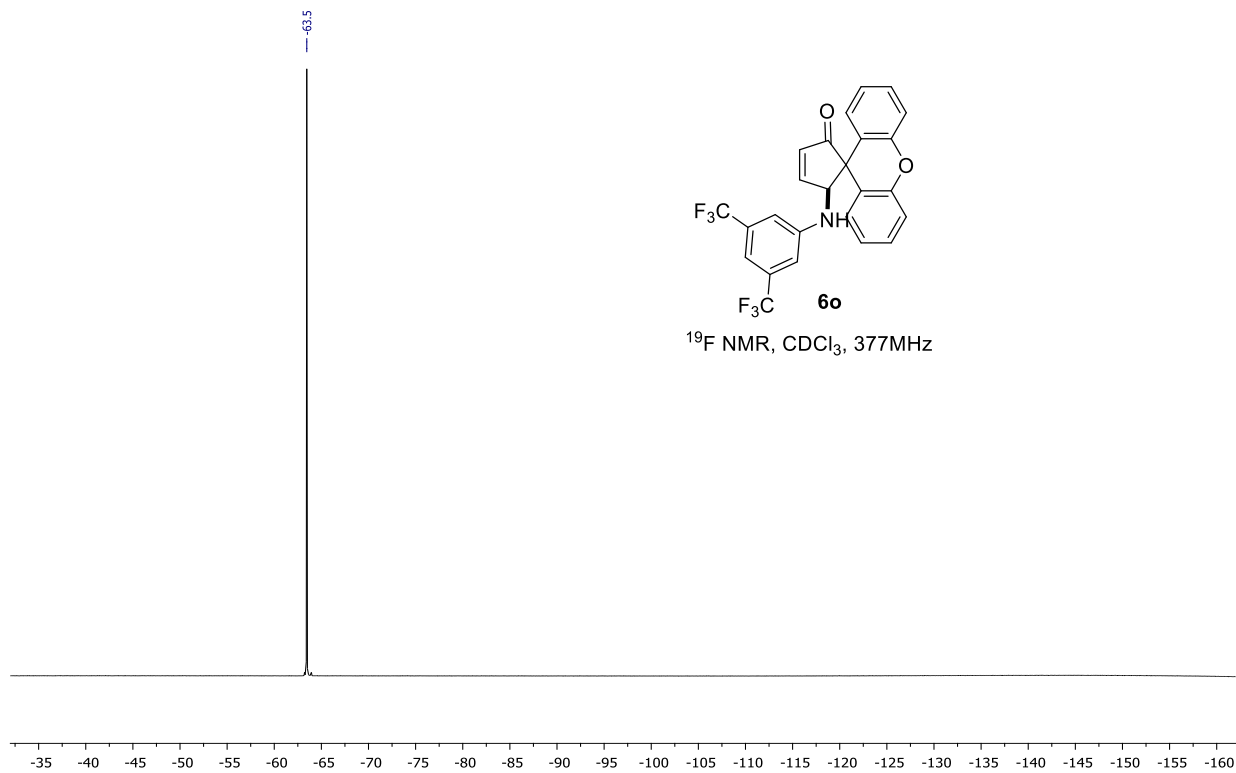

2-((3-Chloro-4-fluorophenyl)amino)spiro[cyclopentane-1,9'-xanthen]-3-en-5-one (6p)

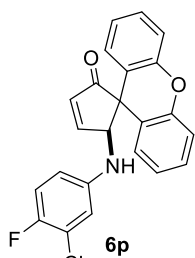

<sup>1</sup>H NMR, CDCl<sub>3</sub>, 400MHz

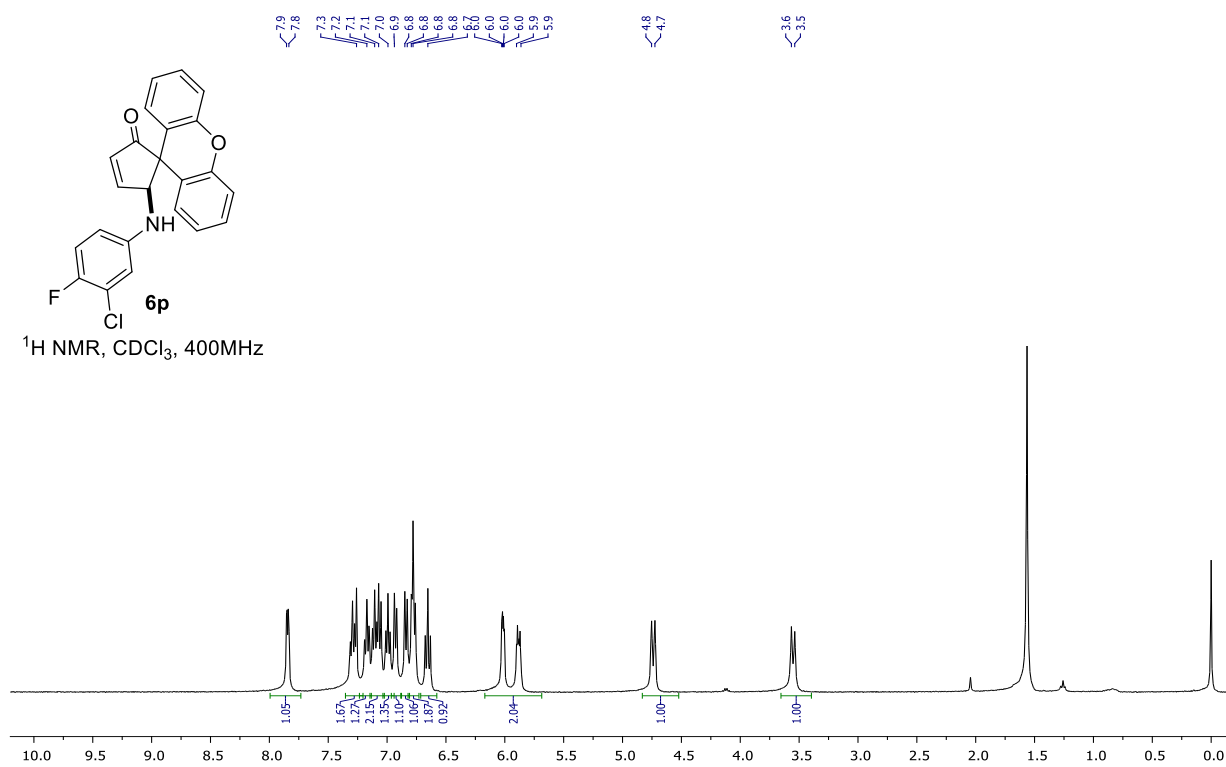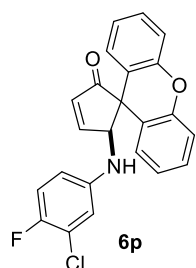

<sup>13</sup>C NMR, CDCl<sub>3</sub>, 100MHz

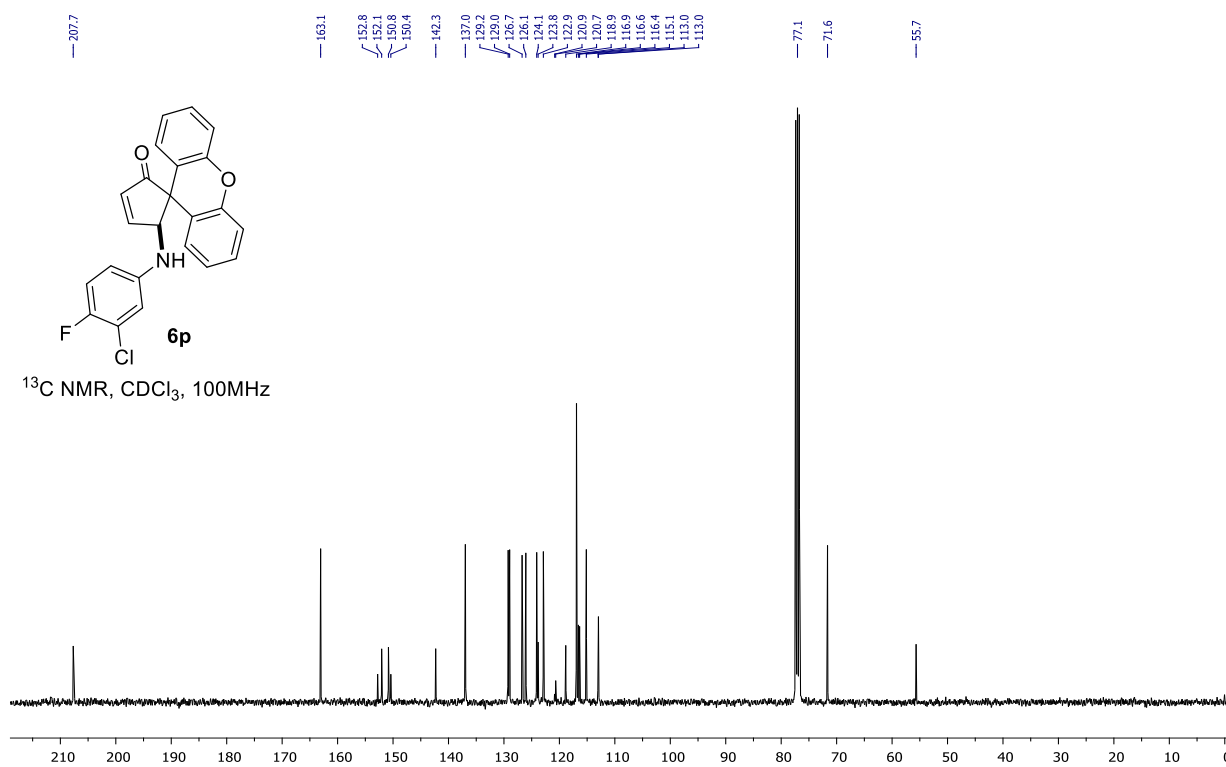

# <sup>19</sup>F Spectrum of compound 6p

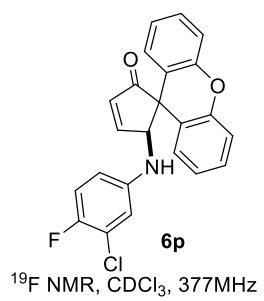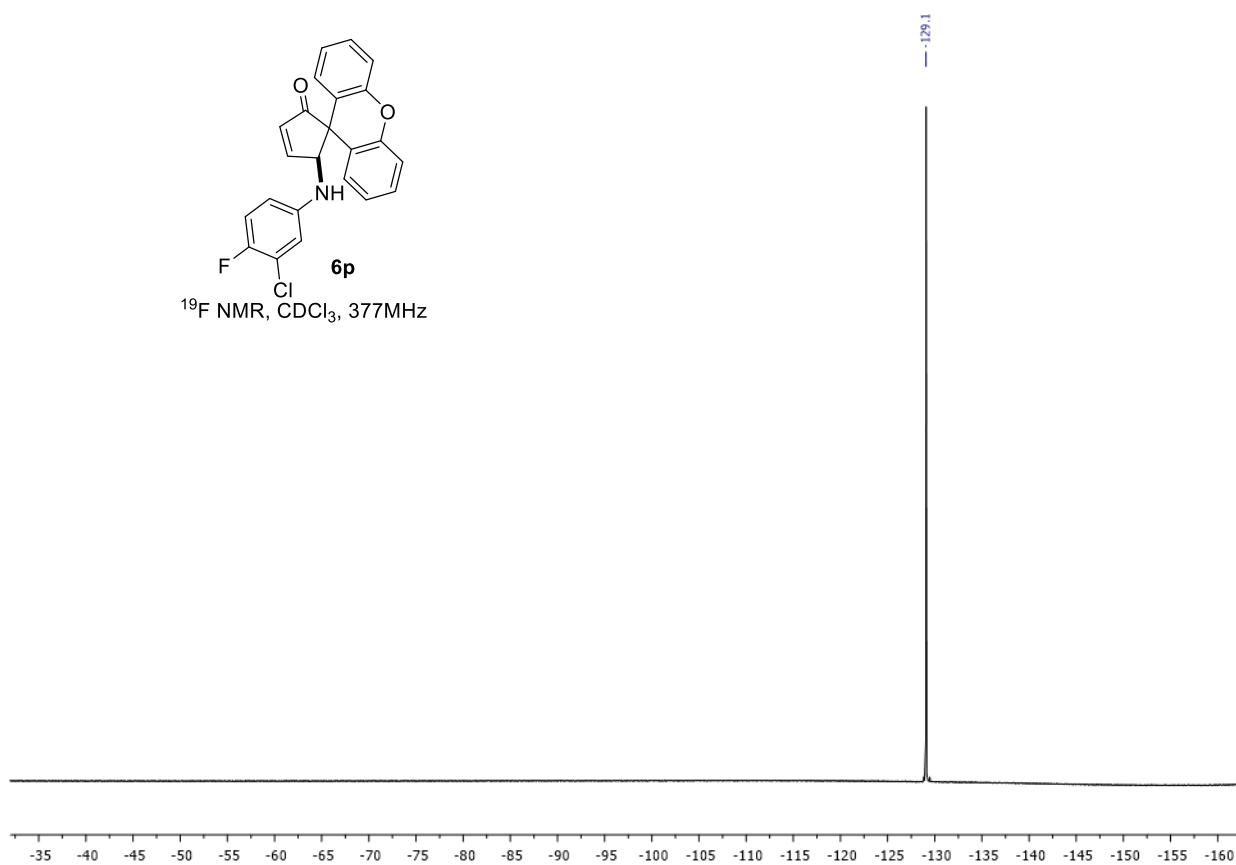

2-((2-Iodo-4-methylphenyl)amino)spiro[cyclopentane-1,9'-xanthen]-3-en-5-one (6q)

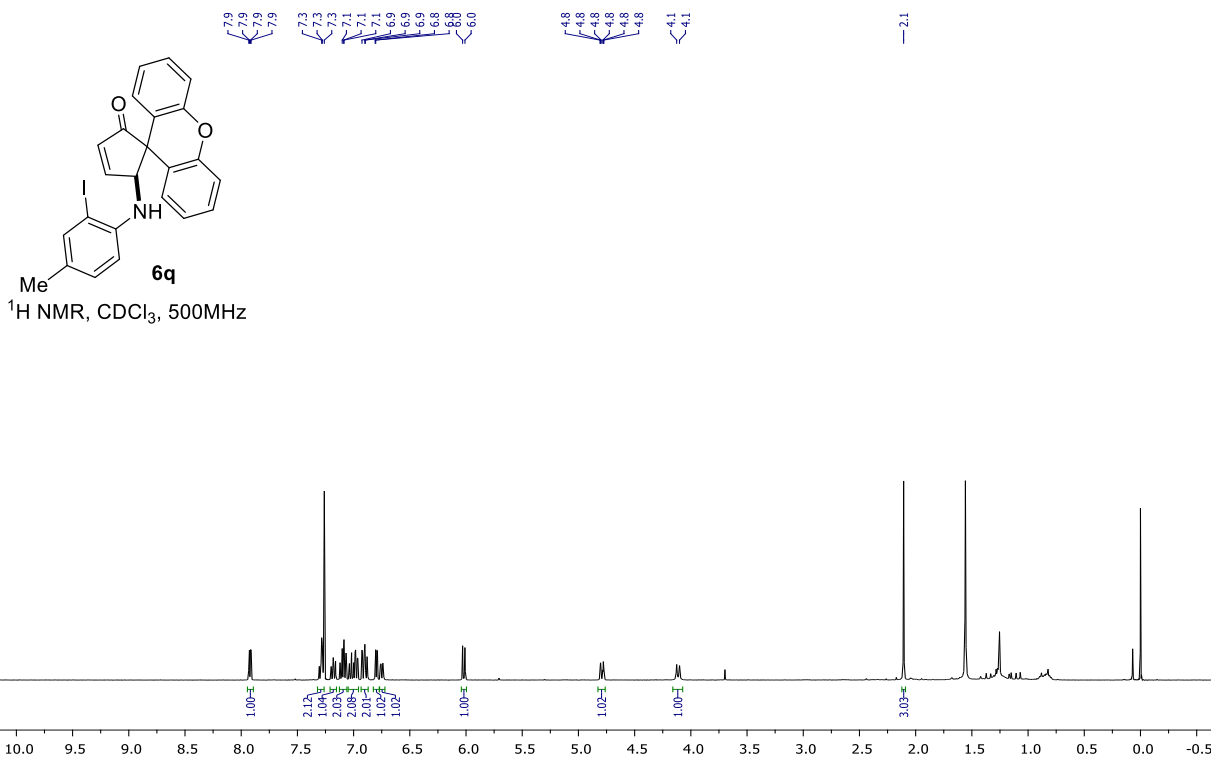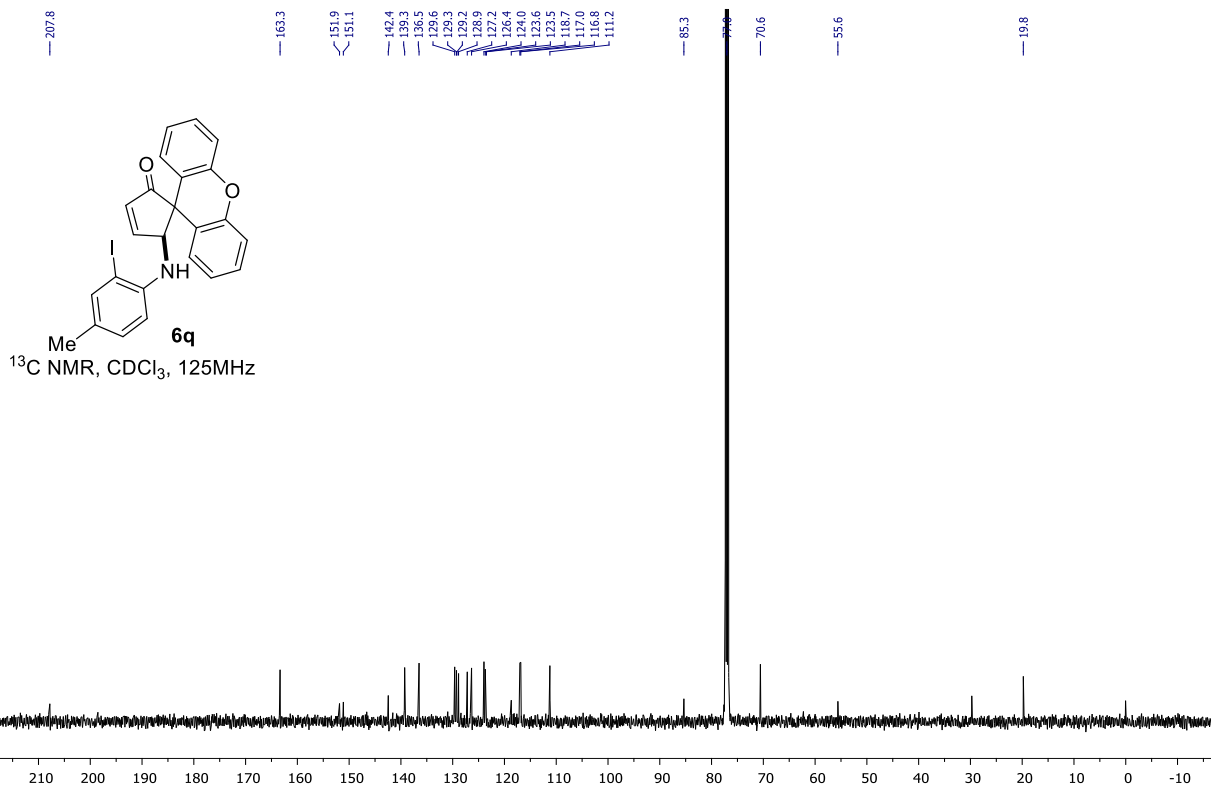

5-((3,4,5-Trimethoxyphenyl)amino)spiro[cyclopentane-1,9'-xanthen]-3-en-2-one (6r)

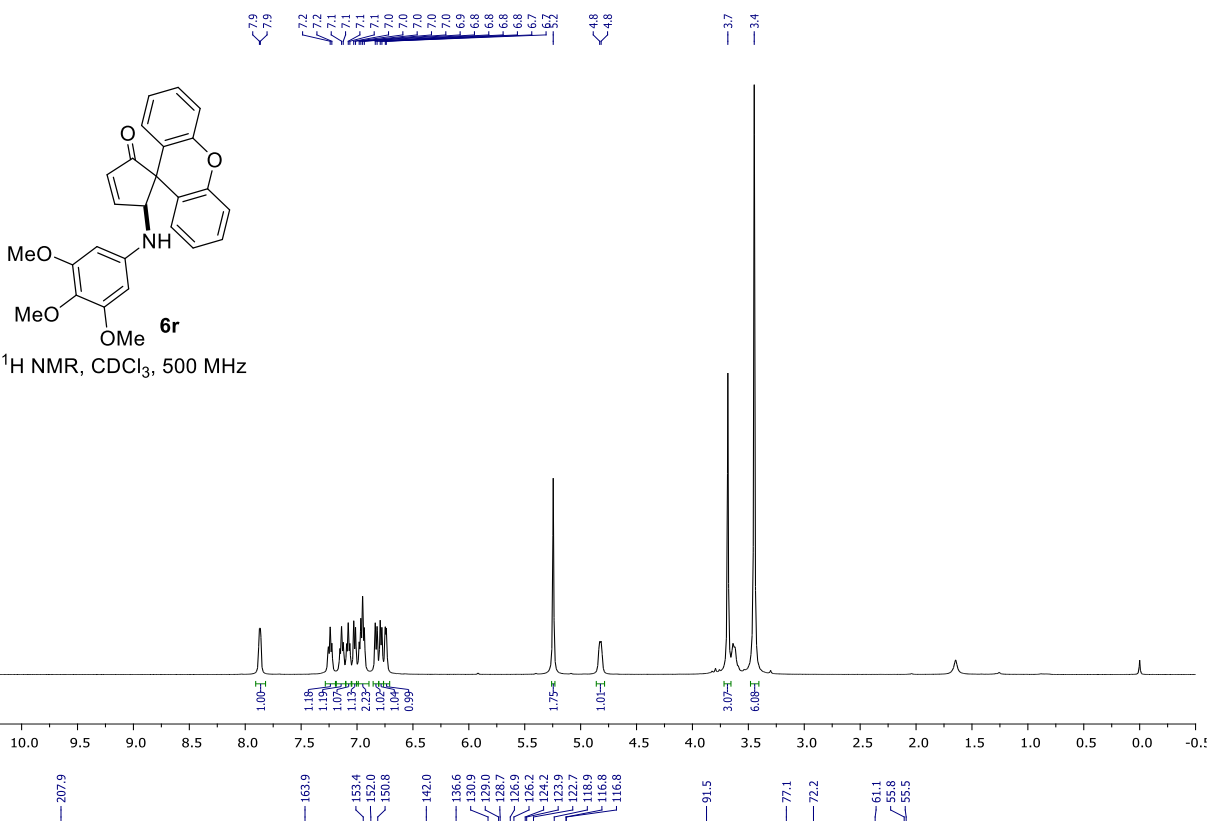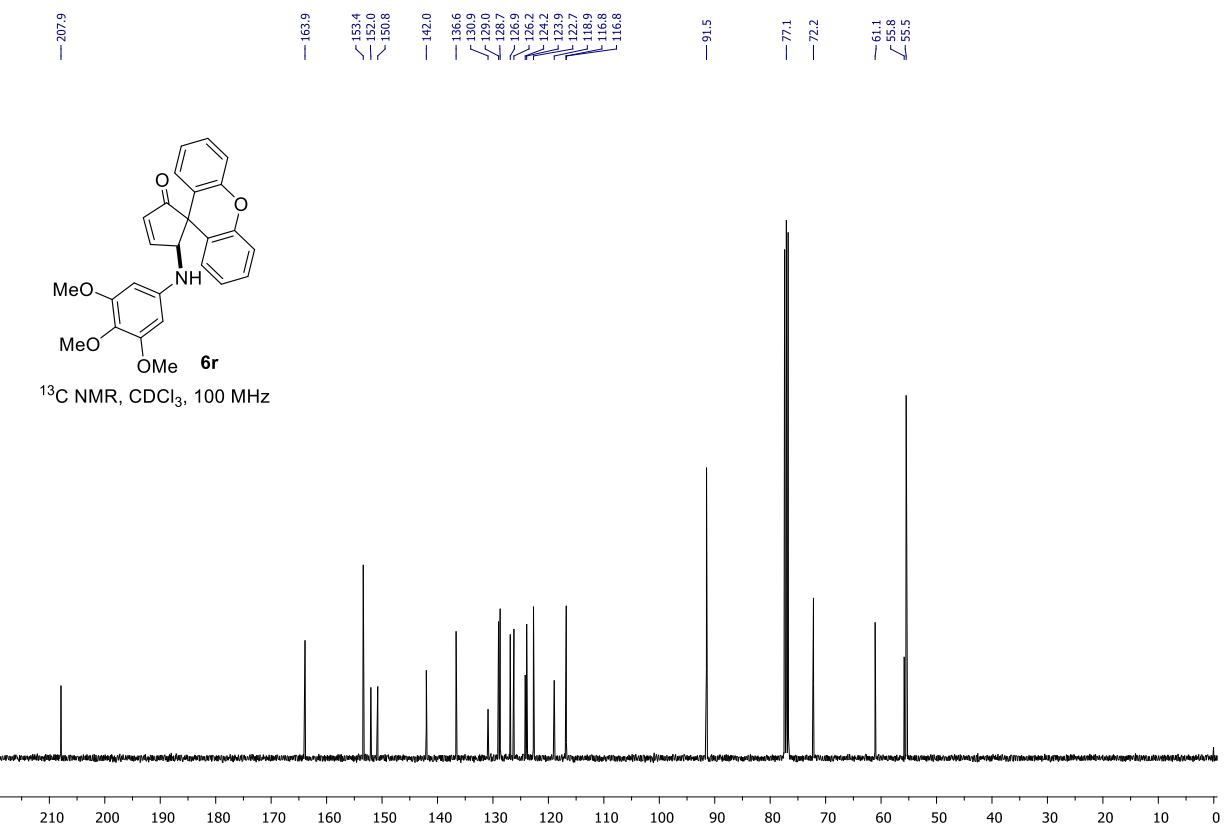

### 5-(Quinolin-4-ylamino)spiro[cyclopentane-1,9'-xanthen]-3-en-2-one (6s)

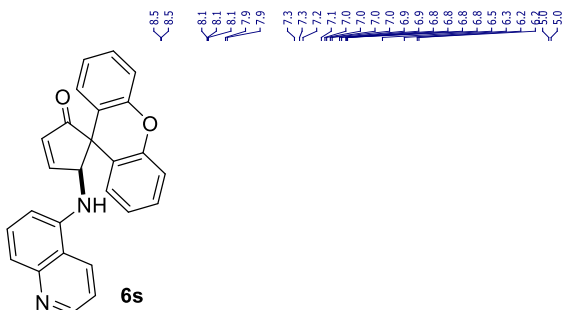

<sup>1</sup>H NMR, CDCl<sub>3</sub>, 500MHz

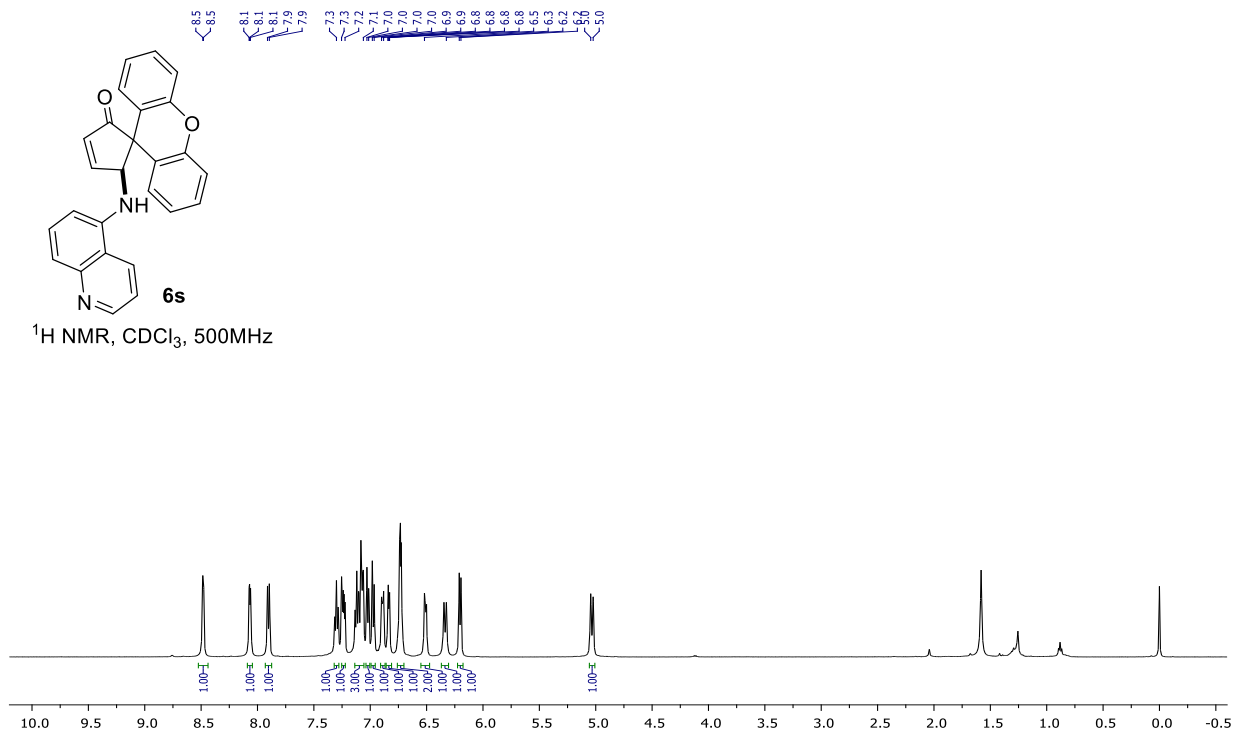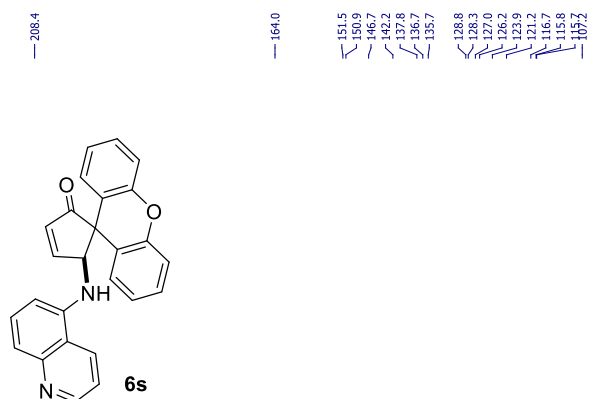

<sup>13</sup>C NMR, CDCl<sub>3</sub>, 100MHz

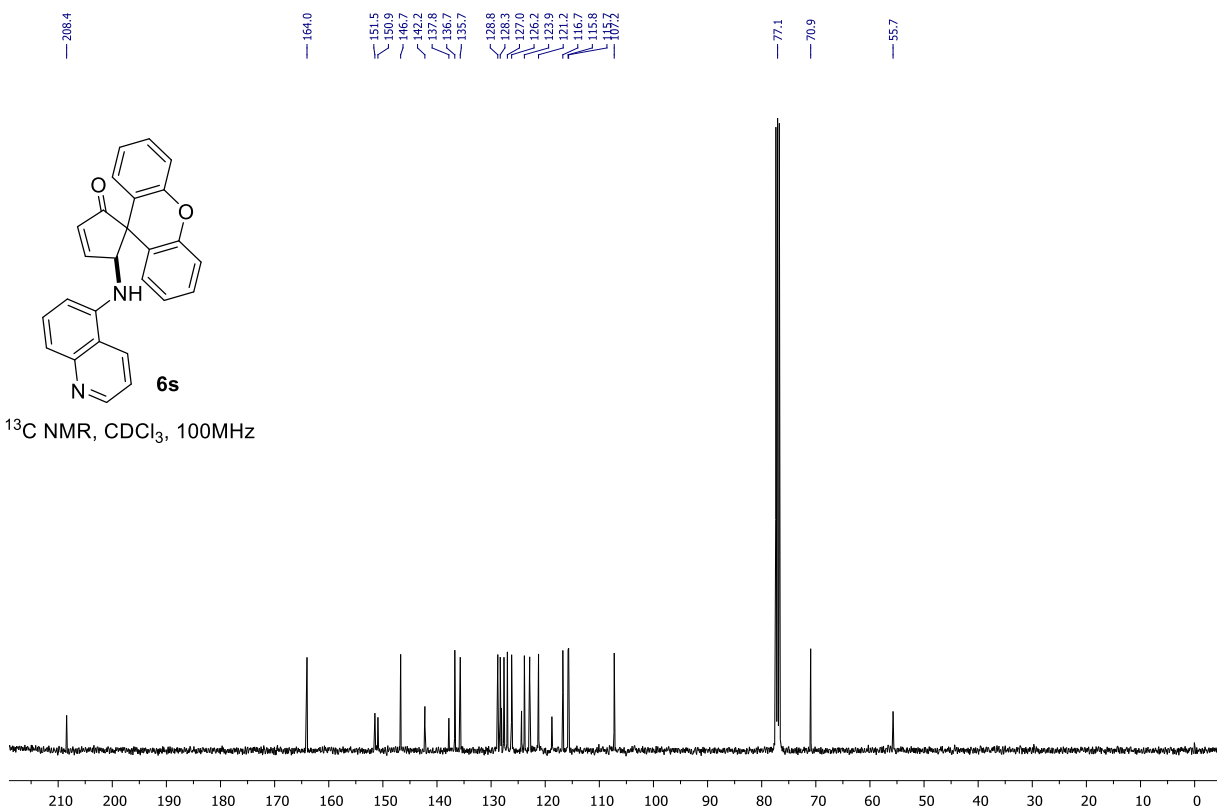

## 2-(Naphthalen-1-yl(phenyl)amino)spiro[cyclopentane-1,9'-xanthen]-3-en-5-one (6t)

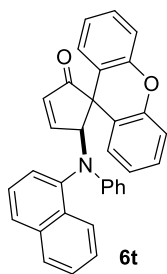

$^1\text{H NMR}$ ,  $\text{CDCl}_3$ , 500MHz

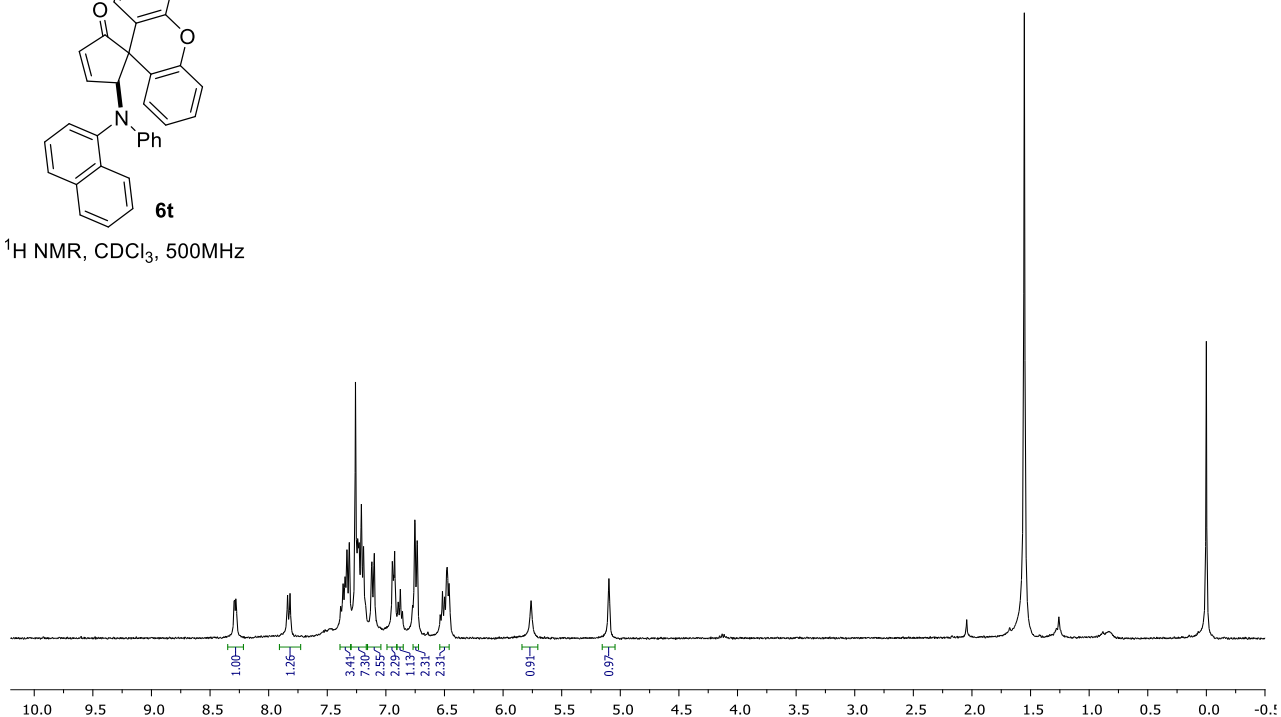

Chemical Shifts (ppm): 207.9, 163.9, 152.4, 152.0, 150.8, 142.0, 138.6, 130.9, 129.9, 129.7, 128.9, 128.2, 124.2, 123.9, 122.7, 118.9, 116.8, 91.5, 77.1, 72.2, 61.1, 55.8, 55.5

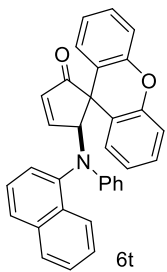

$^{13}\text{C NMR}$ ,  $\text{CDCl}_3$ , 100MHz

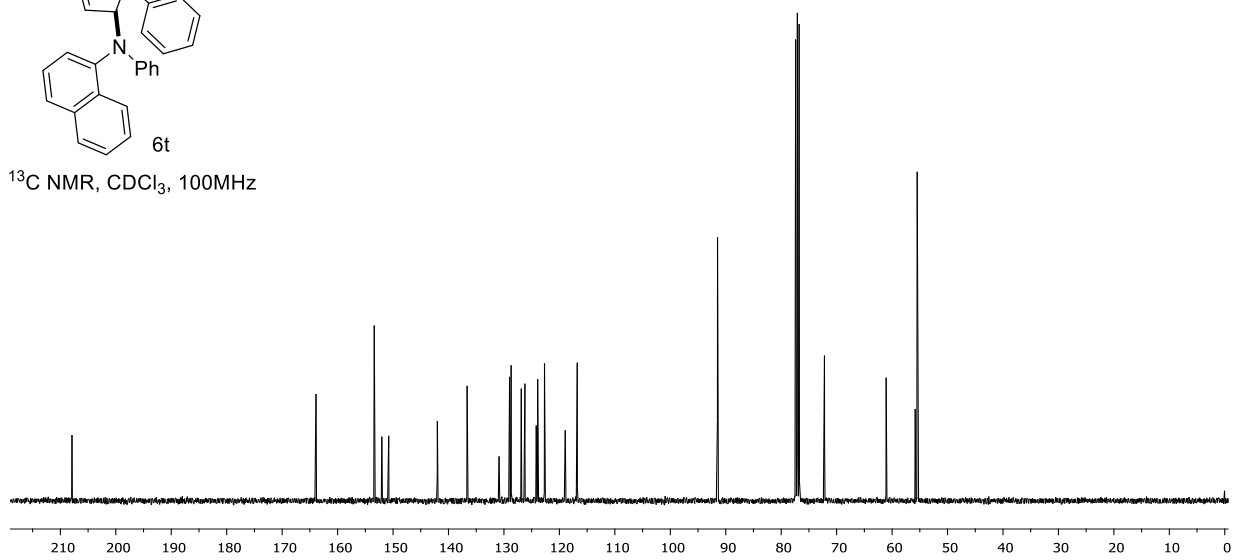



## 2-(1*H*-Indol-3-yl)spiro[cyclopentane-1,3'-indolin]-3-ene-2',5-dione (8a)

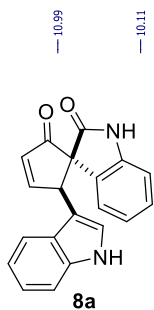

<sup>1</sup>H NMR, DMSO-*d*<sub>6</sub>, 400 MHz

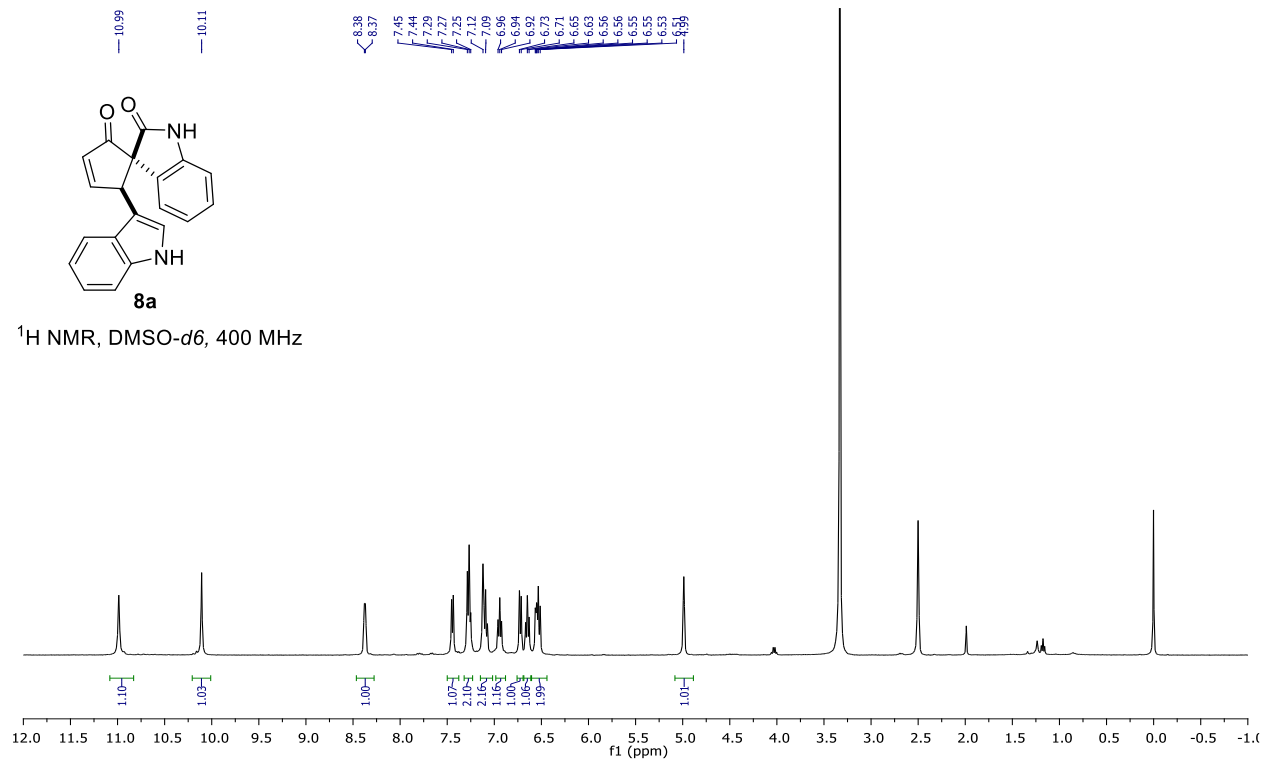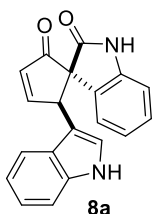

<sup>13</sup>C NMR, DMSO-*d*<sub>6</sub>, 100 MHz

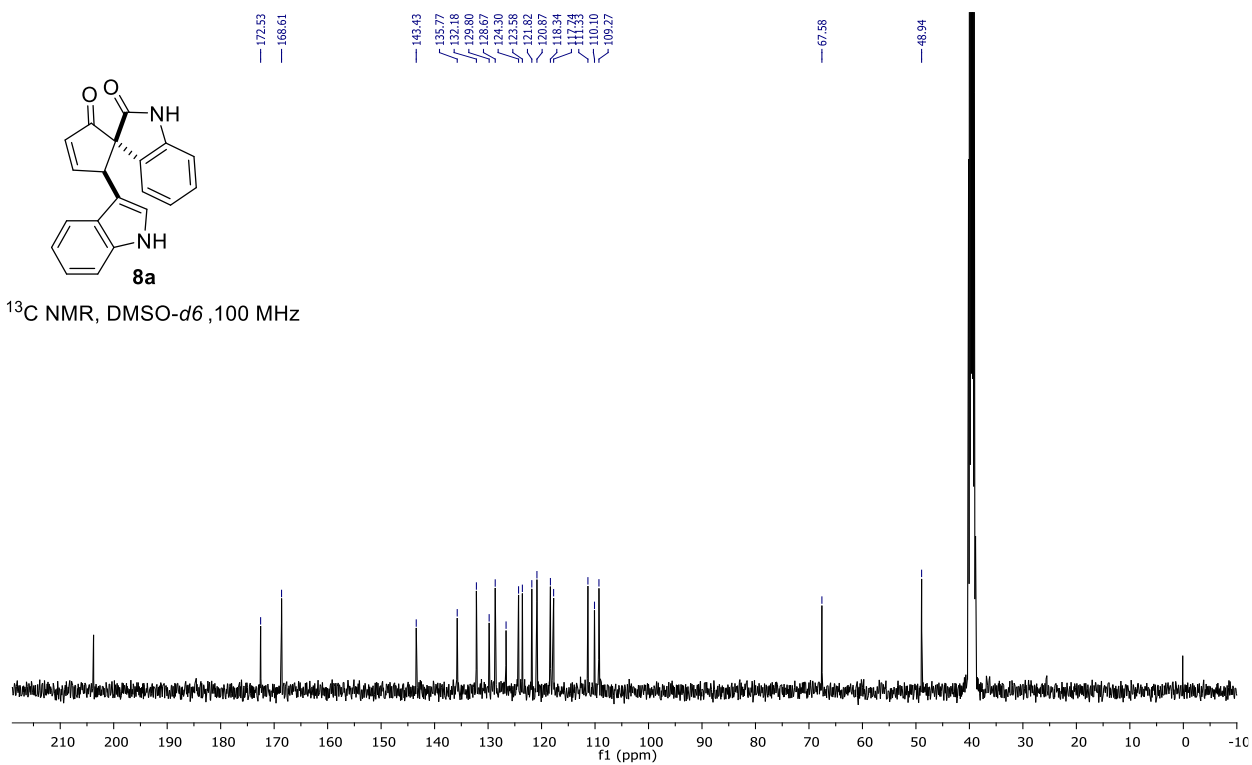

## 2-(1*H*-Indol-3-yl)-1'-methylspiro[cyclopentane-1,3'-indolin]-3-ene-2',5-dione (8b)

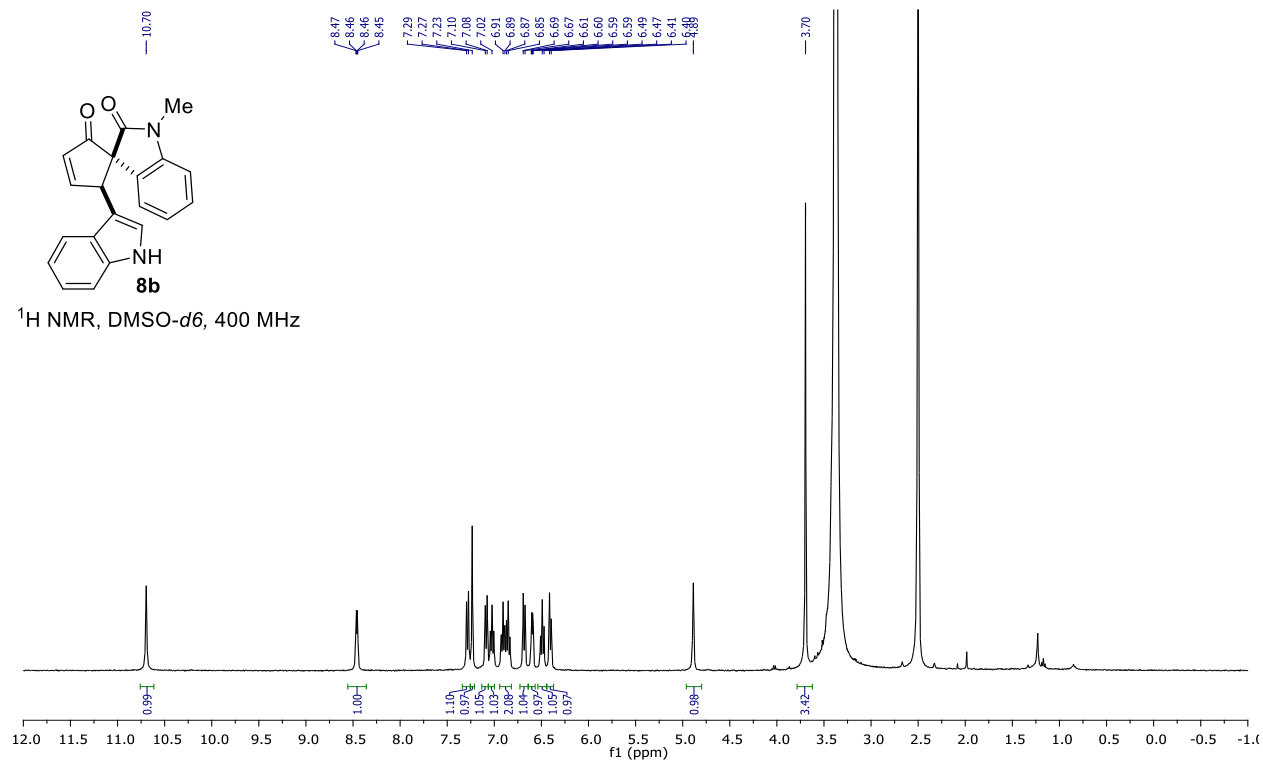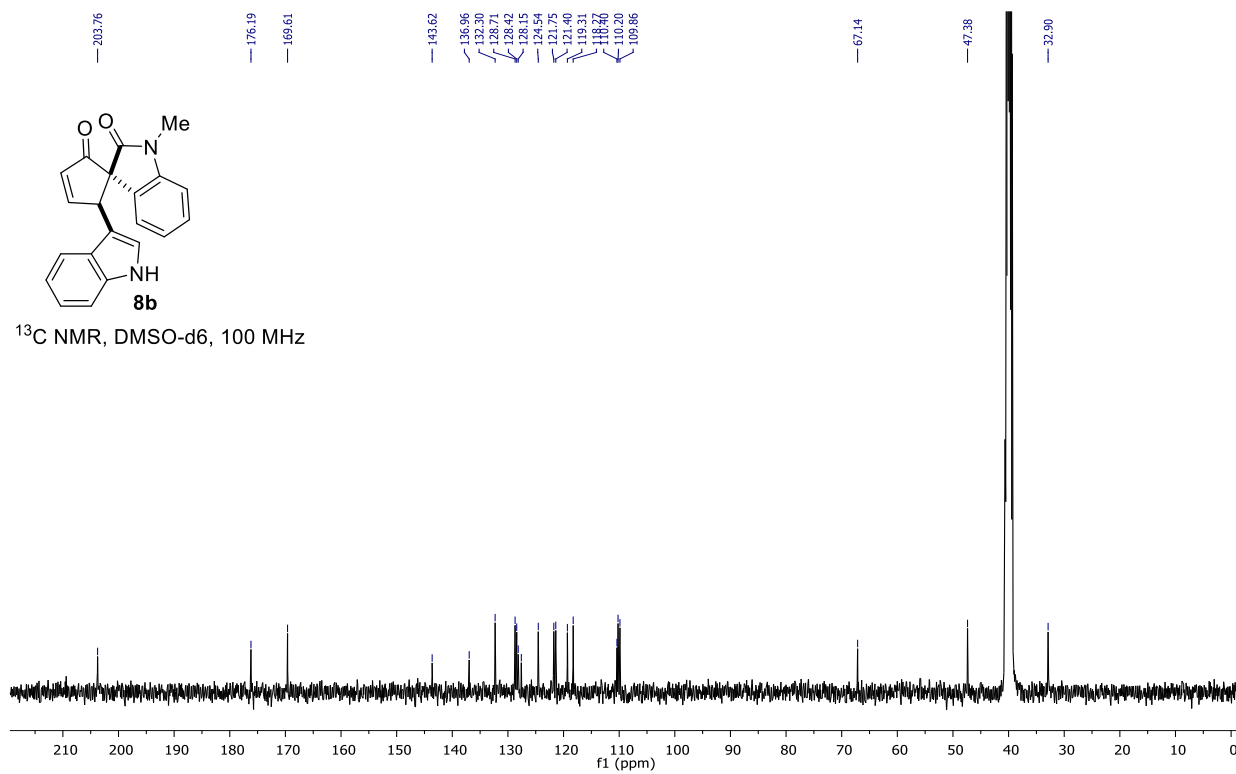



## 2-(1-Methyl-1*H*-indol-3-yl)spiro[cyclopentane-1,9'-thioxanthen]-3-en-5-one (8d)

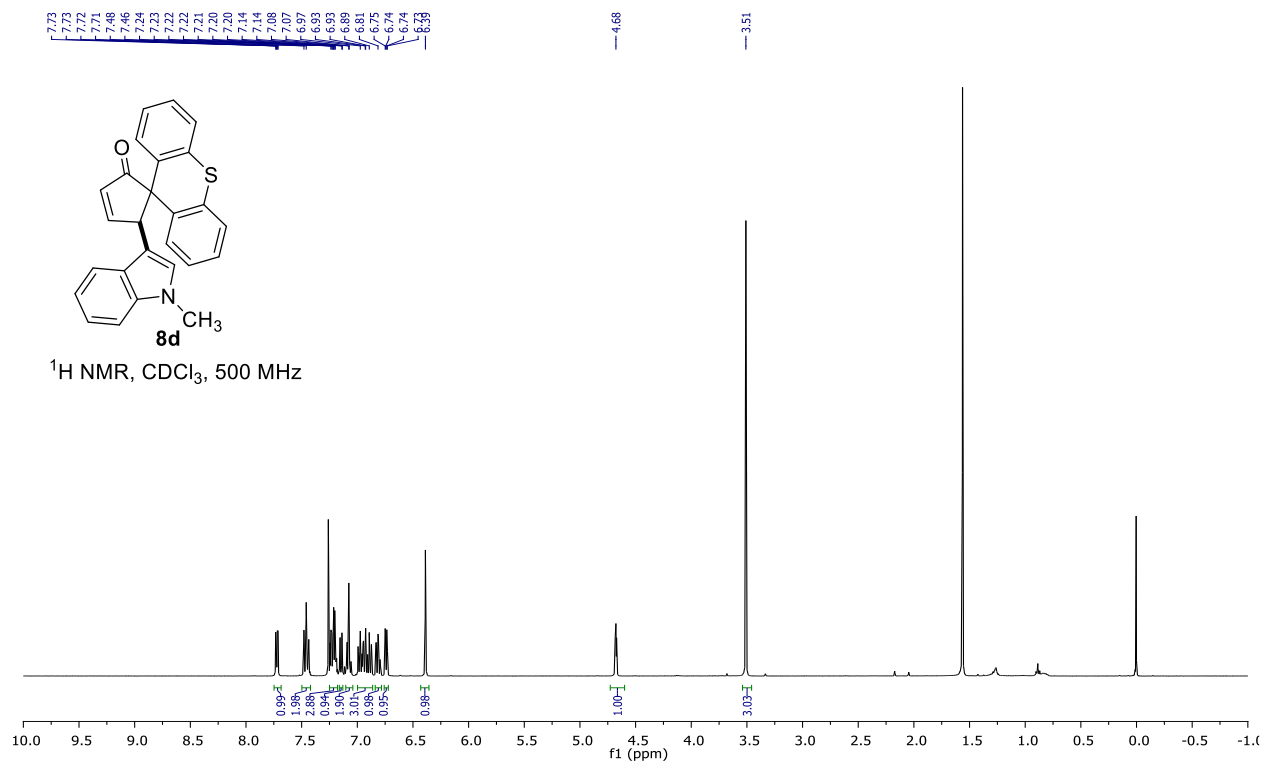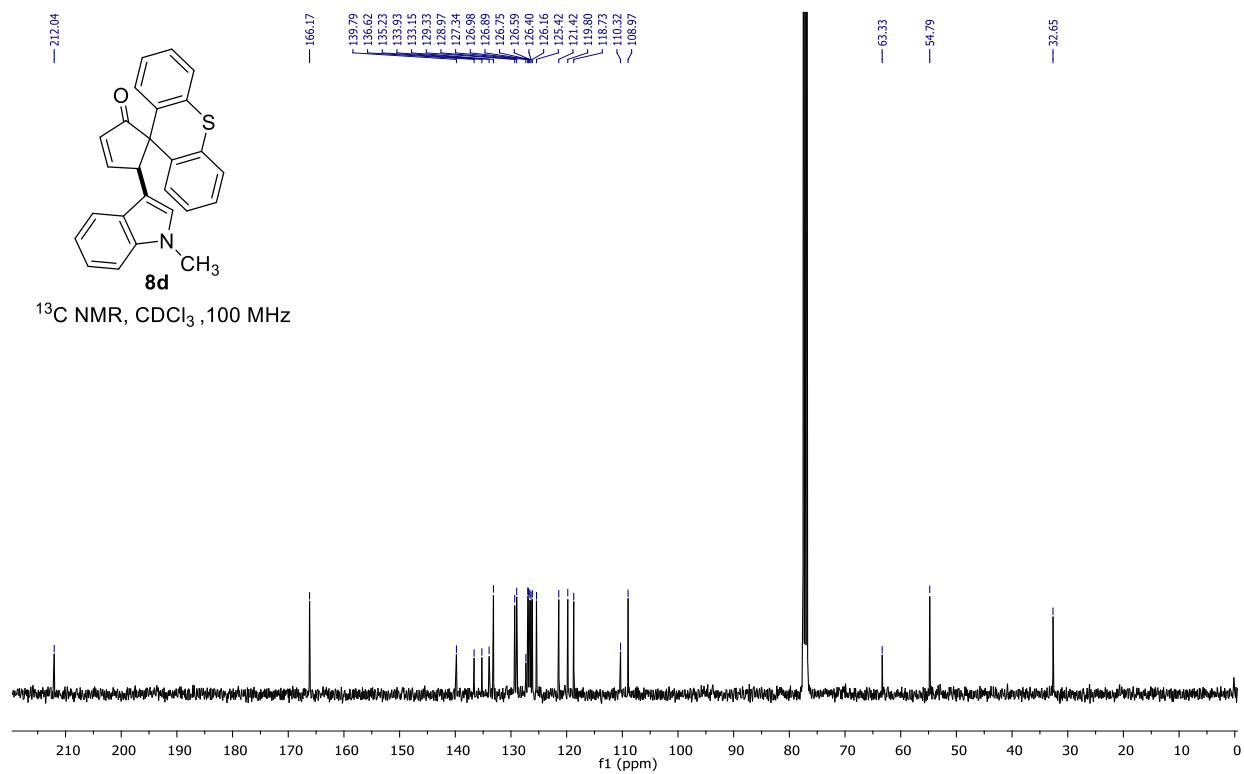

## 2-(1*H*-Indol-3-yl)spiro[cyclopentane-1,9'-fluoren]-3-en-5-one (8e)

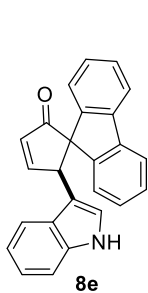

<sup>1</sup>H NMR, CDCl<sub>3</sub>, 400 MHz

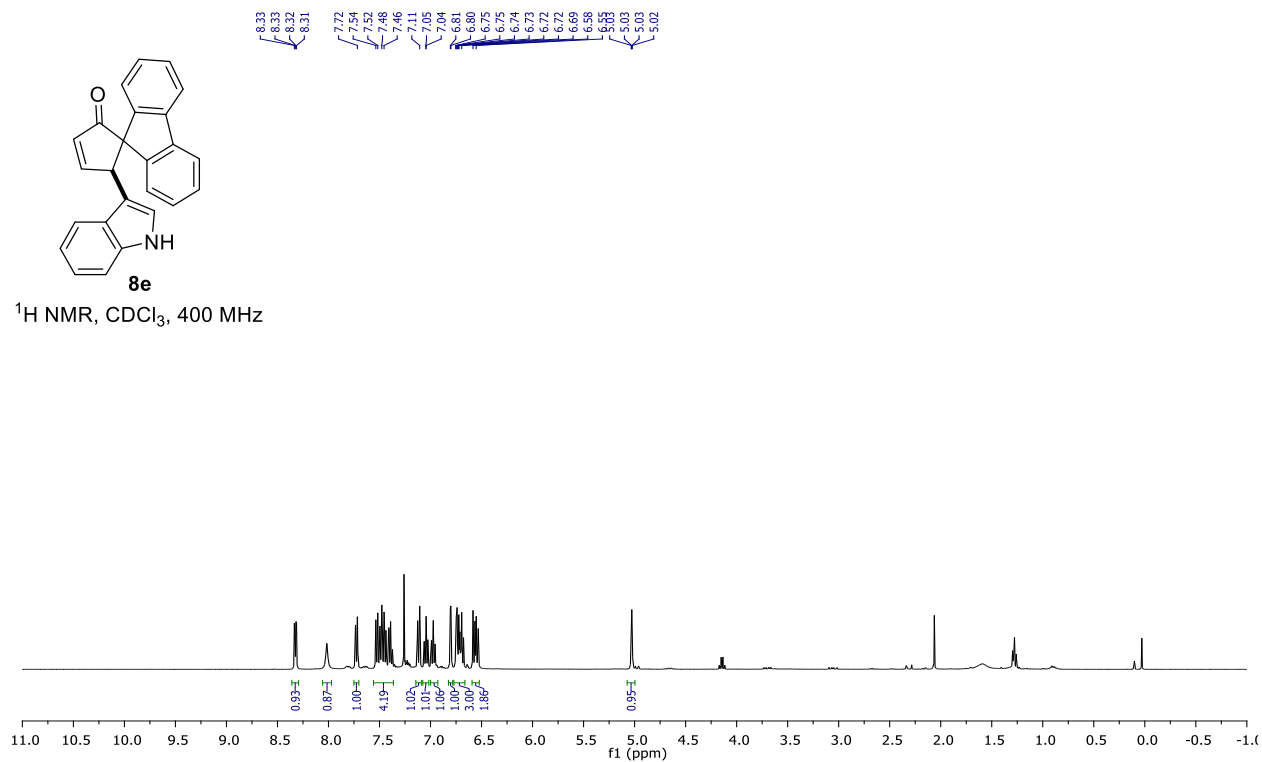

Chemical structure of **8e** is shown above the spectrum. The spectrum displays the following chemical shifts (ppm):

| Chemical Shift (ppm) |
|----------------------|
| 208.13               |
| 165.76               |
| 146.82               |
| 143.63               |
| 142.02               |
| 141.87               |
| 135.99               |
| 134.59               |
| 128.29               |
| 127.85               |
| 127.58               |
| 127.13               |
| 126.95               |
| 126.77               |
| 123.37               |
| 122.15               |
| 121.72               |
| 120.47               |
| 119.88               |
| 119.49               |
| 118.97               |
| 114.32               |
| 110.90               |
| 68.41                |
| 50.22                |

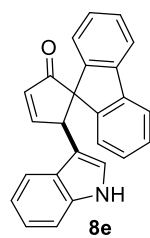

<sup>13</sup>C NMR, CDCl<sub>3</sub>, 100 MHz

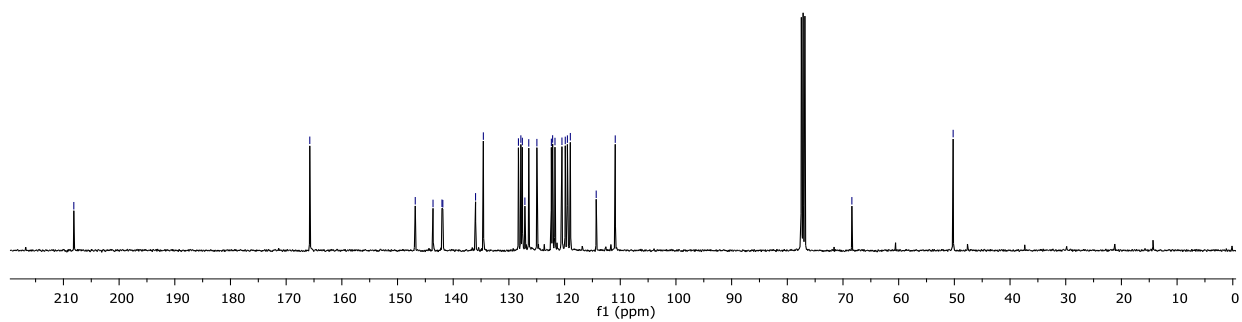

## 2-((4-Methoxyphenyl)amino)spiro[cyclopentane-1,9'-fluoren]-5-one (9)

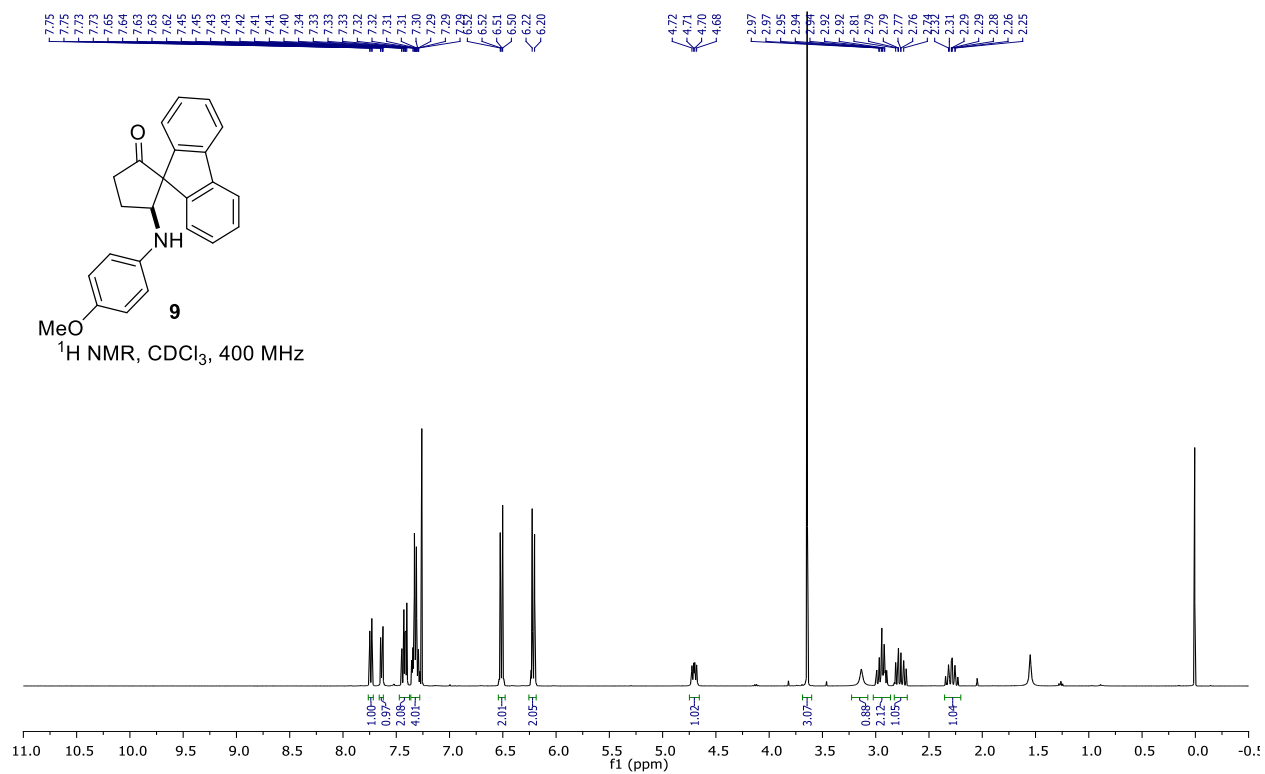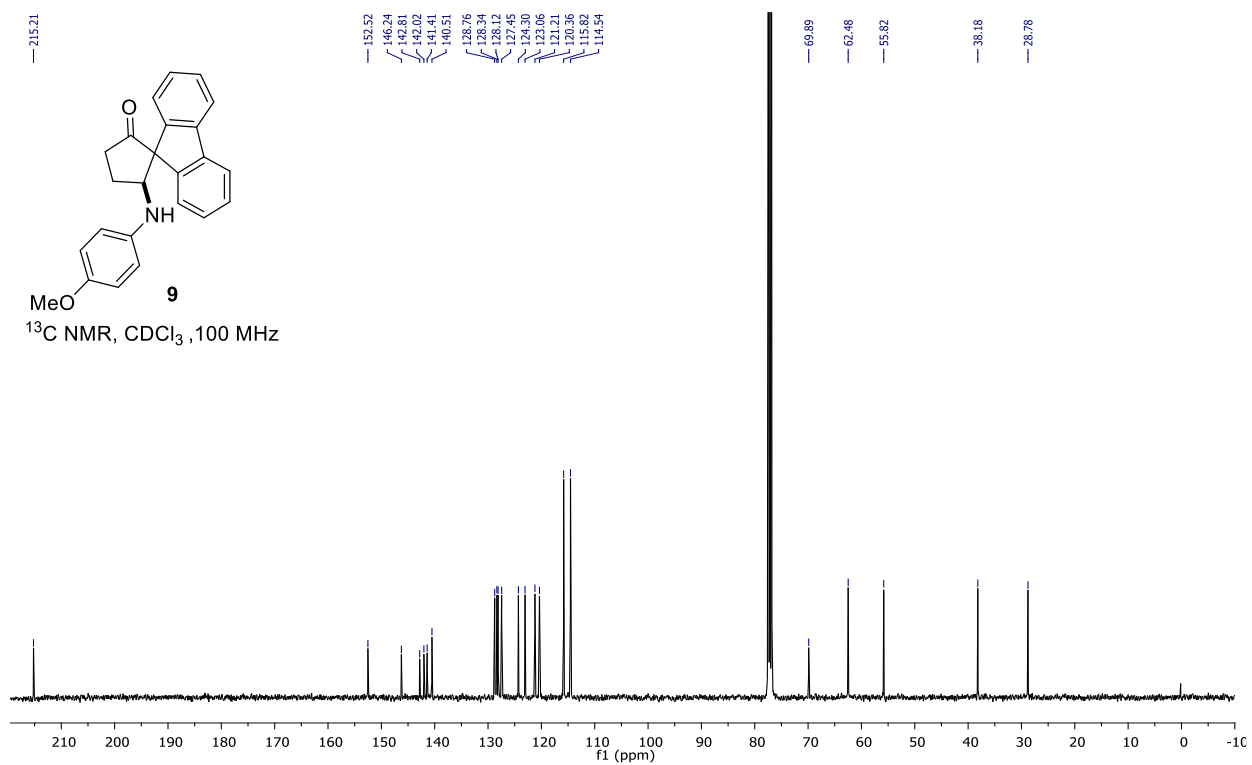

**tert-Butyl -(2-oxospiro[cyclopentane-1,9'-fluoren]-5-yl)carbamate (10)**

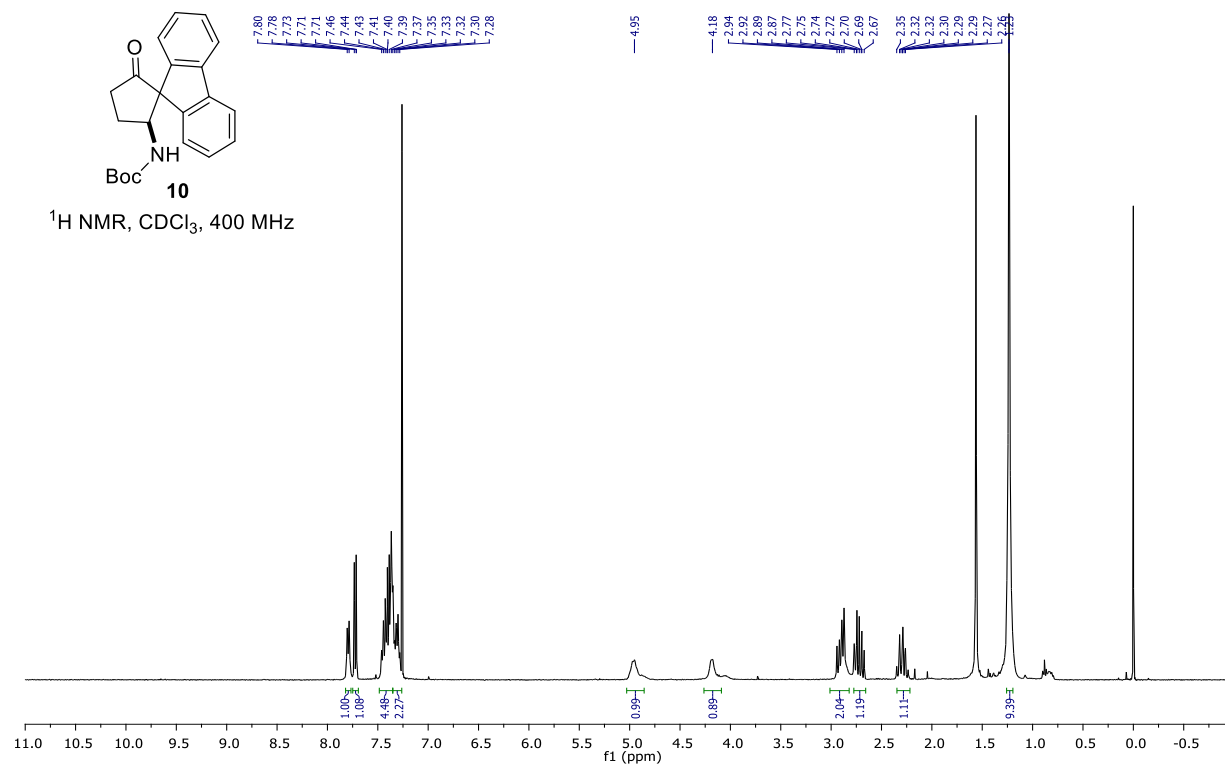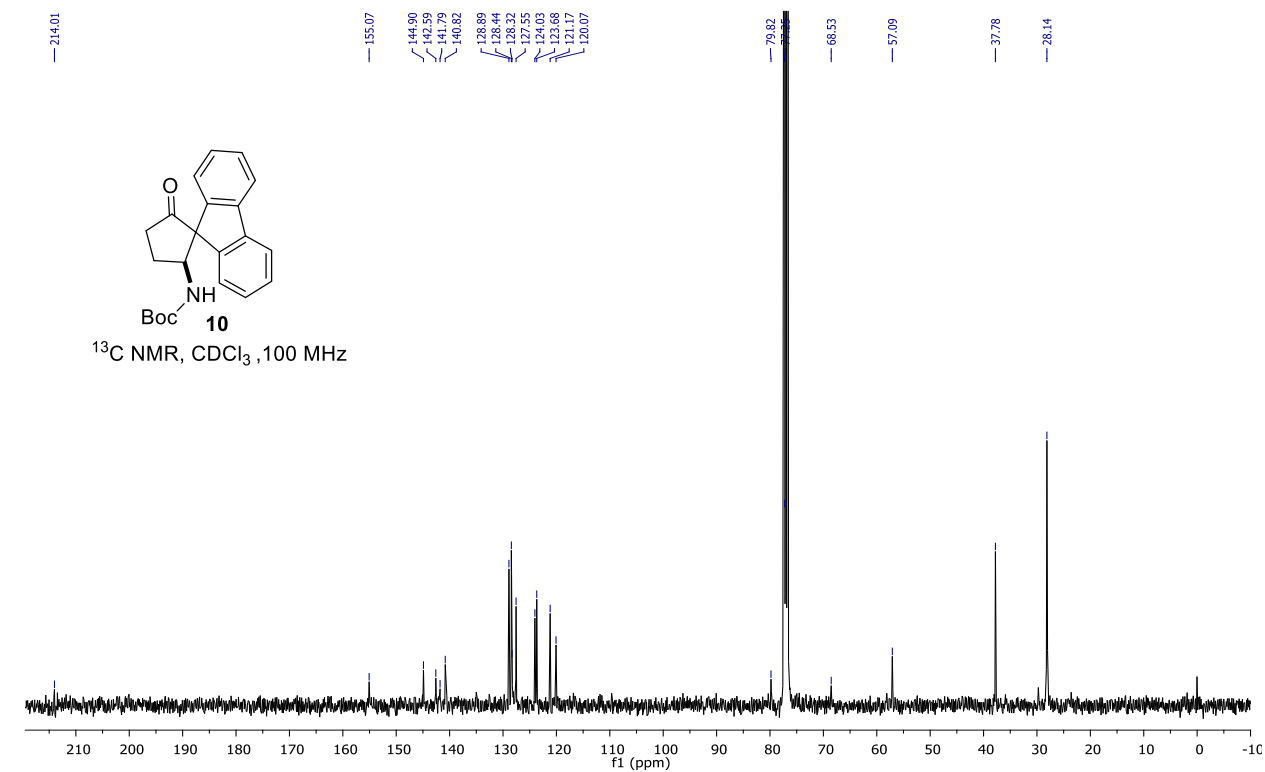

#### 4. Study of Stereoselectivity of Hydroxy Spirocyclopentenoneoxindole **2b**

The stereoselectivity of spirocycle **2b** was checked by reaction with different BINOL-derived phosphoric acid, BINOL.PA catalysts and compared the results by chiral HPLC for crude reaction mixture before silica gel column purification (Table S1). All reactions were monitored by TLC (completion of starting material) and crude reaction mixture after work up was taken for HPLC analysis to check the ratio of 4 stereoisomers. The reaction with the Lewis acid  $B(C_6F_5)_3$  catalyst gave *trans/cis* ratio 1.0:1.8. Reaction with racemic BINOL-derived phosphoric acid [(±)-BINOL.PA-1] gave stereoselectivity (*trans/cis* ratio 2:1). (*R*)-BINOL derived phosphoric acid [(*R*)-BINOL.PA-2] gave stereoselectivity (*trans/cis* ratio 3.5:1) at 90 °C and there is no change in the stereoselectivity (*trans/cis* ratio 3.5:1) when the reaction was carried out at room temperature. Low catalyst loading (1 mol%) has not improved but decreased the stereoselectivity (*trans/cis* ratio 1.9:1). (*R*)-BINOL.PA-3 and (*R*)-BINOL.PA-4 catalysts gave stereoselectivity 2.5:1 and 1.1:1 respectively. A combination of Lewis acid and Brønsted acid catalysts was checked to see the effect of cooperative catalysis. Reaction with  $Ln(OTf)_3$  (1 mol%) and (*R*)-BINOL.PA-3 (1 mol%) gave better stereoselectivity (*trans/cis* ratio 1:4.9) with *cis*-isomer as major product. The above results indicate that stereoselectivity is depending on the structure of the catalyst but not on the catalyst loading, reaction temperature and time (entries 2-7).



**Table S1. Study of stereoselectivity of hydroxy-spirocyclopentenone 2b<sup>a</sup>**

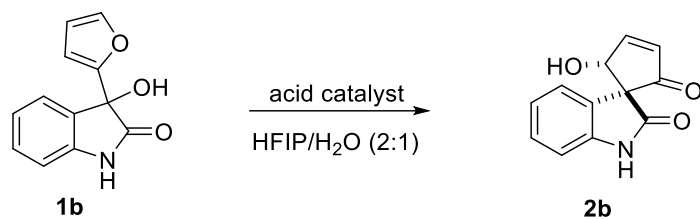

(±)-BINOL.PA-1 = R = H; 1,1'-Binaphthyl-2,2'-diyl hydrogenphosphate (racemic)

(*R*)-BINOL.PA-2 = R = H;

(*R*)-BINOL.PA-3 = R = 9-anthracenyl;

(*R*)-BINOL.PA-4 = R = 2,4,6-(*i*Pr)<sub>3</sub>-C<sub>6</sub>H<sub>2</sub>;

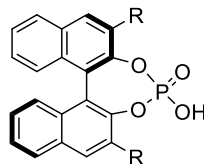

| entry | catalyst                                               | catalyst loading (mol%) | temp (°C) | time (h)   | <i>trans/cis</i> ratio <sup>b</sup> |
|-------|--------------------------------------------------------|-------------------------|-----------|------------|-------------------------------------|
| 1     | B(C <sub>6</sub> F <sub>5</sub> ) <sub>3</sub>         | 2.5                     | rt        | 48         | 35:65                               |
| 2     | (±)-BINOL.PA-1                                         | 2.5                     | rt        | 6          | 67:33                               |
| 3     | <b>(<i>R</i>)-BINOL.PA-2</b>                           | <b>2.5</b>              | <b>90</b> | <b>0.5</b> | <b>78:22</b>                        |
| 4     | ( <i>R</i> )- BINOL.PA-2                               | 2.5                     | rt        | 5          | 77:23                               |
| 5     | ( <i>R</i> )- BINOL.PA-2                               | 1.0                     | rt        | 12         | 65:35                               |
| 6     | ( <i>R</i> )- BINOL.PA-3                               | 2.5                     | rt        | 18         | 71:29                               |
| 7     | ( <i>R</i> )- BINOL.PA-4                               | 2.5                     | rt        | 24         | 53:47                               |
| 8     | <b>Ln(OTf)<sub>3</sub> &amp; (<i>R</i>)-BINOL.PA-3</b> | <b>1.0 (each)</b>       | <b>rt</b> | <b>18</b>  | <b>17:83</b>                        |

<sup>a</sup>Reaction completion was monitored by TLC (consumption of starting material). <sup>b</sup>Chiral HPLC of crude product after workup (without purification) as mentioned in the above conditions. rt = room temperature (25 °C).

#### 4.1. HPLC chromatogram of the compound 2b obtained by B(C<sub>6</sub>F<sub>5</sub>)<sub>3</sub> catalyst

HPLC analysis conditions: CHIRALPAK IC column, 30% *i*PrOH in hexanes, flow rate 1.0 mL/min,  $\lambda = 225$  nm,  $t_r$  (diastereomer 1) = 8.452 min,  $t_r$  (diastereomer 2) = 10.837 min,  $t_r$  (diastereomer 3) = 14.856 min and  $t_r$  (diastereomer 4) = 18.422 min. The *trans/cis* ratio was determined by HPLC analysis of crude product obtained by using 2.5 mol% of B(C<sub>6</sub>F<sub>5</sub>)<sub>3</sub> catalyst at room temperature (25 °C) for 48 h.

### HPLC Analysis Report

Sample Name : SCS-PRS-04  
Sample ID : SCS-PRS-04  
Vial # : 66  
Injection Volume : 10  $\mu$ L  
Data File Name : 30072021.5.lcd  
Method File Name : 30072021.lcm  
Report File Name : HPLC Report.lcr  
Data Acquired : 7/30/2021 2:02:39 PM  
Data Processed : 7/30/2021 5:02:53 PM  
Chromatographic Conditions: COLUMN : CHIRALPAK IC 250X4.6mm 5 $\mu$   
MOBILE PHASE : 30% IPA IN HEXANE  
FLOW RATE : 1ml/min

#### <Chromatogram>

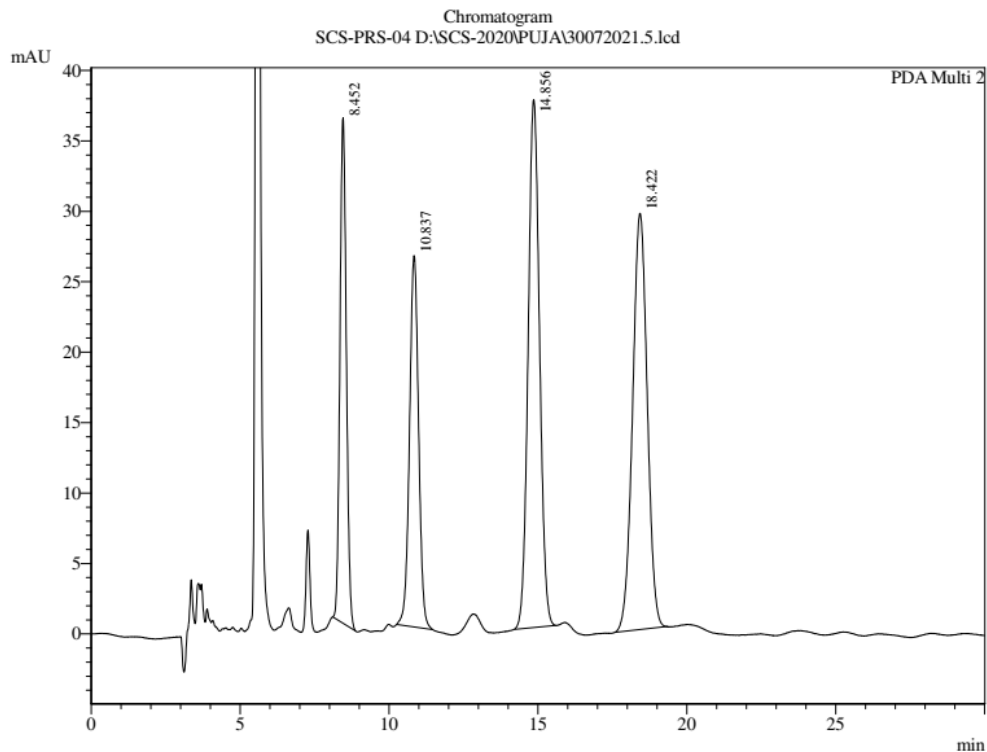

PeakTable

PDA Ch2 225nm 4nm

| Peak# | Ret. Time | Area    | Height | Area %  | Height % |
|-------|-----------|---------|--------|---------|----------|
| 1     | 8.452     | 536991  | 35878  | 17.344  | 27.756   |
| 2     | 10.837    | 556292  | 26370  | 17.967  | 20.401   |
| 3     | 14.856    | 994832  | 37475  | 32.132  | 28.992   |
| 4     | 18.422    | 1008006 | 29537  | 32.557  | 22.851   |
| Total |           | 3096121 | 129260 | 100.000 | 100.000  |

## 4.2. HPLC chromatogram of the compound 2b obtained by racemic BINOL-derived phosphoric acid catalyst [(±)-BINOL.PA-1]

HPLC analysis conditions: CHIRALPAK IC column, 30% *i*PrOH in hexanes, flow rate 1.0 mL/min,  $\lambda = 225$  nm,  $t_r$  (diastereomer 1) = 8.396 min,  $t_r$  (diastereomer 2) = 10.73 min,  $t_r$  (diastereomer 3) = 15.136 min and  $t_r$  (diastereomer 4) = 18.861 min. The *trans/cis* ratio was determined by HPLC analysis of crude product obtained by using 2.5 mol% of [(±)-BINOL.PA-1] catalyst at room temperature (25 °C) for 6 h.

### HPLC Analysis Report

Sample Name : SCS-PRS-01  
Sample ID : SCS-PRS-01  
Vial # : 63  
Injection Volume : 10  $\mu$ L  
Data File Name : 30072021.2.lcd  
Method File Name : 30072021.lcm  
Report File Name : HPLC Report.lcr  
Data Acquired : 7/30/2021 12:31:01 PM  
Data Processed : 7/30/2021 4:15:40 PM  
Chromatographic Conditions: COLUMN : CHIRALPAK IC 250X4.6mm 5 $\mu$   
MOBILE PHASE : 30% IPA IN HEXANE  
FLOW RATE : 1ml/min

#### <Chromatogram>

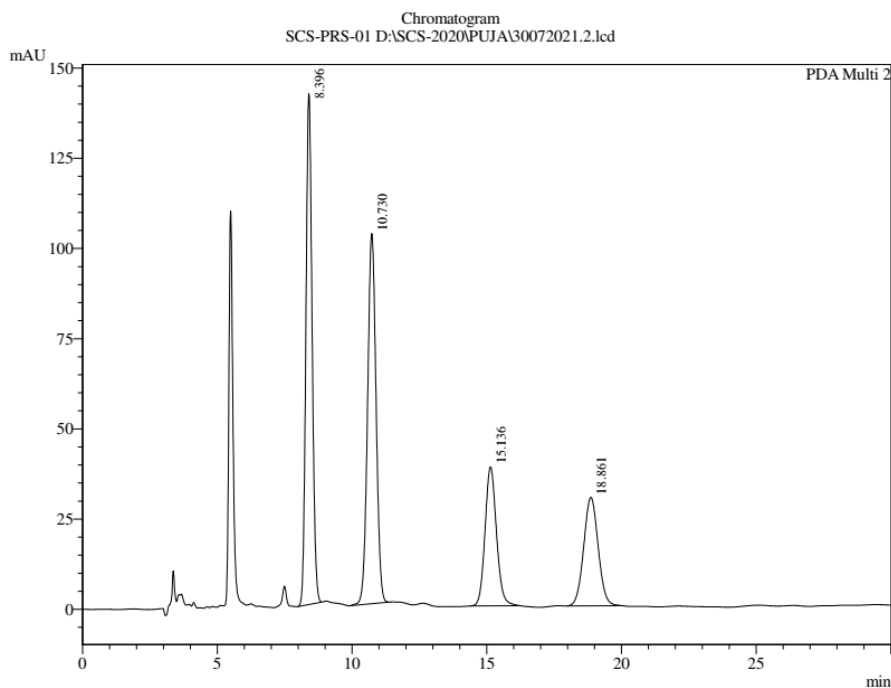

PeakTable

| Peak# | Ret. Time | Area    | Height | Area %  | Height % |
|-------|-----------|---------|--------|---------|----------|
| 1     | 8.396     | 2256243 | 141598 | 33.398  | 45.269   |
| 2     | 10.730    | 2240123 | 102606 | 33.159  | 32.803   |
| 3     | 15.136    | 1137119 | 38512  | 16.832  | 12.312   |
| 4     | 18.861    | 1122126 | 30076  | 16.610  | 9.615    |
| Total |           | 6755611 | 312792 | 100.000 | 100.000  |

### 4.3. HPLC chromatogram of the compound 2b obtained by (*R*)-BINOL-derived phosphoric acid [(*R*)-BINOL.PA-2] at 90 °C

HPLC analysis conditions: CHIRALPAK IC column, 30% *i*PrOH in hexanes, flow rate 1.0 mL/min,  $\lambda = 225$  nm,  $t_r$  (diastereomer 1) = 8.49 min,  $t_r$  (diastereomer 2) = 10.868 min,  $t_r$  (diastereomer 3) = 15.253 min and  $t_r$  (diastereomer 4) = 18.927 min. The *trans/cis* ratio was determined by HPLC analysis of crude product obtained by using 2.5 mol% of [(*R*)-BINOL.PA-2] catalyst at 90 °C for 30 min.

#### HPLC Analysis Report

Sample Name : SCS-PRS-02  
 Sample ID : SCS-PRS-02  
 Vial # : 64  
 Injection Volume : 10  $\mu$ L  
 Data File Name : 30072021.3.lcd  
 Method File Name : 30072021.lcm  
 Report File Name : HPLC Report.lcr  
 Data Acquired : 7/30/2021 1:01:33 PM  
 Data Processed : 7/30/2021 4:18:51 PM  
 Chromatographic Conditions: COLUMN : CHIRALPAK IC 250X4.6mm 5 $\mu$   
 MOBILE PHASE : 30% IPA IN HEXANE  
 FLOW RATE : 1ml/min

#### <Chromatogram>

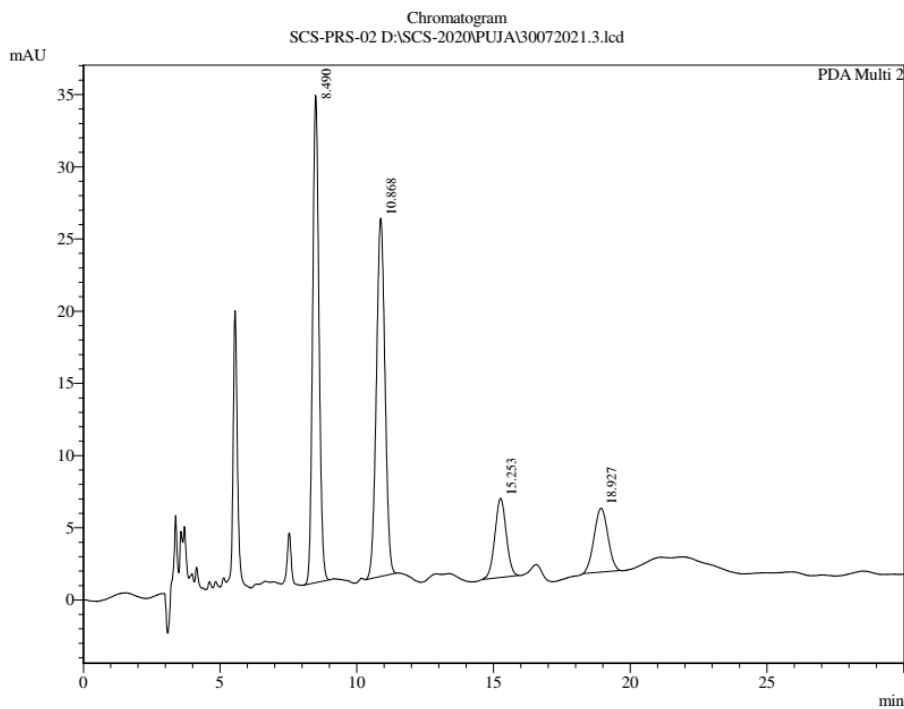

PeakTable

| Peak# | Ret. Time | Area    | Height | Area %  | Height % |
|-------|-----------|---------|--------|---------|----------|
| 1     | 8.490     | 544921  | 33763  | 38.869  | 49.294   |
| 2     | 10.868    | 543443  | 24812  | 38.764  | 36.225   |
| 3     | 15.253    | 157845  | 5476   | 11.259  | 7.996    |
| 4     | 18.927    | 155735  | 4442   | 11.109  | 6.486    |
| Total |           | 1401944 | 68494  | 100.000 | 100.000  |

#### 4.4. HPLC chromatogram of the compound 2b obtained by (*R*)-BINOL-derived phosphoric acid catalyst [(*R*)-BINOL.PA-2] at 25 °C

HPLC analysis conditions: CHIRALPAK IC column, 30% *i*PrOH in hexanes, flow rate 1.0 mL/min,  $\lambda = 225$  nm,  $t_r$  (diastereomer 1) = 8.49 min,  $t_r$  (diastereomer 2) = 10.868 min,  $t_r$  (diastereomer 3) = 15.253 min and  $t_r$  (diastereomer 4) = 18.927 min. The *trans/cis* ratio was determined by HPLC analysis of crude product obtained by using 2.5 mol% of [(*R*)-BINOL.PA-2] catalyst at room temperature (25 °C) for 5 h.

### HPLC Analysis Report

Sample Name : SCS-PRS-00  
 Sample ID : SCS-PRS-00  
 Vial # : 62  
 Injection Volume : 10  $\mu$ L  
 Data File Name : 30072021.1.lcd  
 Method File Name : 30072021.lcm  
 Report File Name : HPLC Report.lcr  
 Data Acquired : 7/30/2021 12:00:27 PM  
 Data Processed : 7/30/2021 4:13:32 PM  
 Chromatographic Conditions: COLUMN : CHIRALPAK IC 250X4.6mm 5 $\mu$   
 MOBILE PHASE : 30% IPA IN HEXANE  
 FLOW RATE : 1ml/min

#### <Chromatogram>

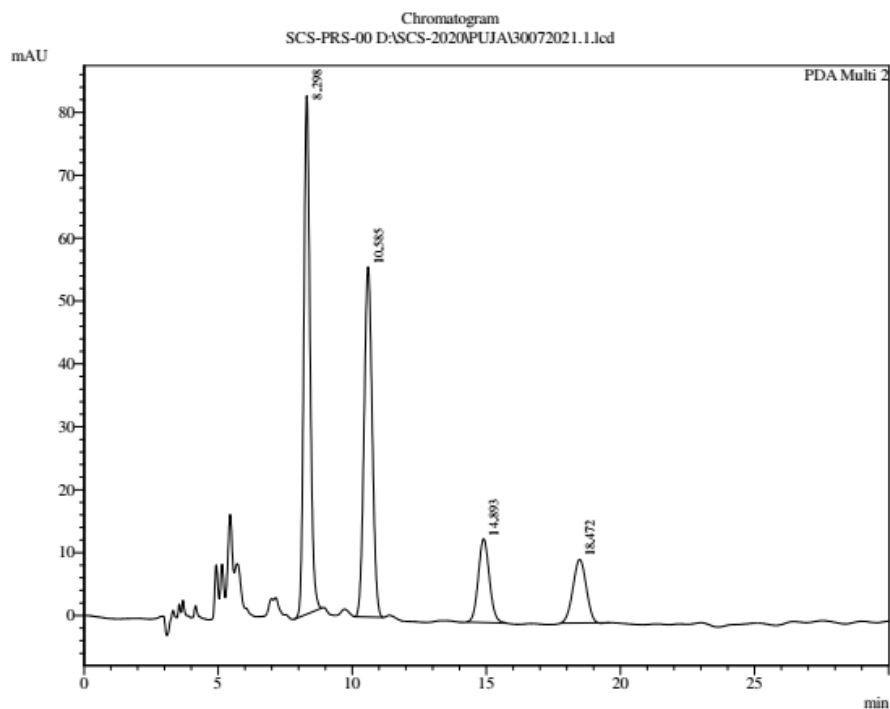

PeakTable

PDA Ch2 225nm 4nm

| Peak# | Ret. Time | Area    | Height | Area %  | Height % |
|-------|-----------|---------|--------|---------|----------|
| 1     | 8.298     | 1334034 | 82437  | 41.133  | 51.025   |
| 2     | 10.585    | 1177053 | 55695  | 36.292  | 34.473   |
| 3     | 14.893    | 383617  | 13319  | 11.828  | 8.244    |
| 4     | 18.472    | 348555  | 10110  | 10.747  | 6.258    |
| Total |           | 3243259 | 161561 | 100.000 | 100.000  |

#### 4.5. HPLC chromatogram of the compound 2b obtained by (*R*)-BINOL-derived phosphoric acid [(*R*)-BINOL.PA-2] (1 mol% at 25 °C)

HPLC analysis conditions: CHIRALPAK IC column, 30% *i*PrOH in hexanes, flow rate 1.0 mL/min,  $\lambda = 225$  nm,  $t_r$  (diastereomer 1) = 8.466 min,  $t_r$  (diastereomer 2) = 10.819 min,  $t_r$  (diastereomer 3) = 15.136 min and  $t_r$  (diastereomer 4) = 18.769 min. The *trans/cis* ratio was determined by HPLC analysis of crude product obtained by using 1.0 mol% of [(*R*)-BINOL.PA-2] catalyst at room temperature (25 °C) for 12 h.

#### HPLC Analysis Report

Acquired by : Manjula  
Sample Name : SCS-PRS-08  
Sample ID : SCS-PRS-08  
Tray# : 1  
Vial # : 34  
Injection Volume : 10  $\mu$ L  
Data File Name : 04082021.5.lcd  
Method File Name : 04082021.lcm  
Batch File Name :  
Report File Name : Default.lcr  
Data Acquired : 8/4/2021 5:06:29 PM  
Data Processed : 8/4/2021 5:36:33 PM  
COLUMN: CHIRALPAK IC 250X4.6mm 5 $\mu$   
MOBILE PHASE: 30% IPA IN HEXANE  
FLOW RATE : 1ml/min

#### <Chromatogram>

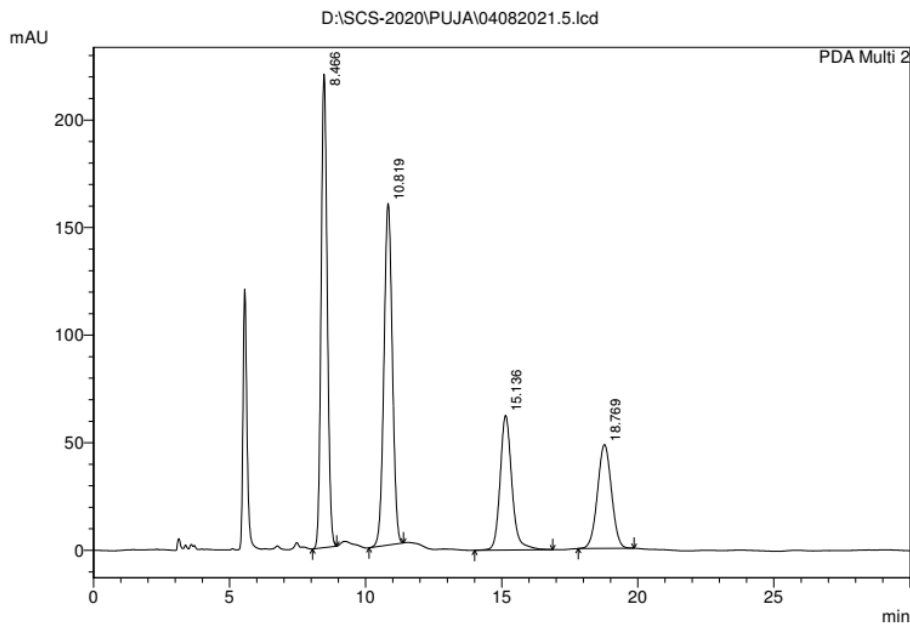

PeakTable

PDA Ch2 225nm 4nm

| Peak# | Ret. Time | Area     | Height | Area %  | Height % |
|-------|-----------|----------|--------|---------|----------|
| 1     | 8.466     | 3437236  | 220128 | 32.916  | 44.943   |
| 2     | 10.819    | 3399020  | 158845 | 32.550  | 32.431   |
| 3     | 15.136    | 1882061  | 62571  | 18.023  | 12.775   |
| 4     | 18.769    | 1724210  | 48248  | 16.511  | 9.851    |
| Total |           | 10442527 | 489792 | 100.000 | 100.000  |

#### 4.6. HPLC chromatogram of the compound 2b obtained by (*R*)-BINOL-derived phosphoric acid [(*R*)-BINOL.PA-3] at room temperature (25 °C)

HPLC analysis conditions: CHIRALPAK IC column, 30% *i*PrOH in hexanes, flow rate 1.0 mL/min,  $\lambda = 225$  nm,  $t_r$  (diastereomer 1) = 8.254 min,  $t_r$  (diastereomer 2) = 10.468 min,  $t_r$  (diastereomer 3) = 14.662 min and  $t_r$  (diastereomer 4) = 18.124 min. The *trans/cis* ratio was determined by HPLC analysis of crude product obtained by using 2.5 mol% of [(*R*)-BINOL.PA-3] catalyst at room temperature (25 °C) for 18 h.

#### HPLC Analysis Report

Acquired by : Manjula  
Sample Name : SCS-PRS-05  
Sample ID : SCS-PRS-05  
Tray# : 1  
Vial # : 31  
Injection Volume : 10  $\mu$ L  
Data File Name : 04082021.2.lcd  
Method File Name : 04082021.lcm  
Batch File Name :  
Report File Name : Default.lcr  
Data Acquired : 8/4/2021 3:32:28 PM  
Data Processed : 8/4/2021 4:02:32 PM  
COLUMN: CHIRALPAK IC 250X4.6mm 5 $\mu$   
MOBILE PHASE: 30% IPA IN HEXANE  
FLOW RATE : 1ml/min

#### <Chromatogram>

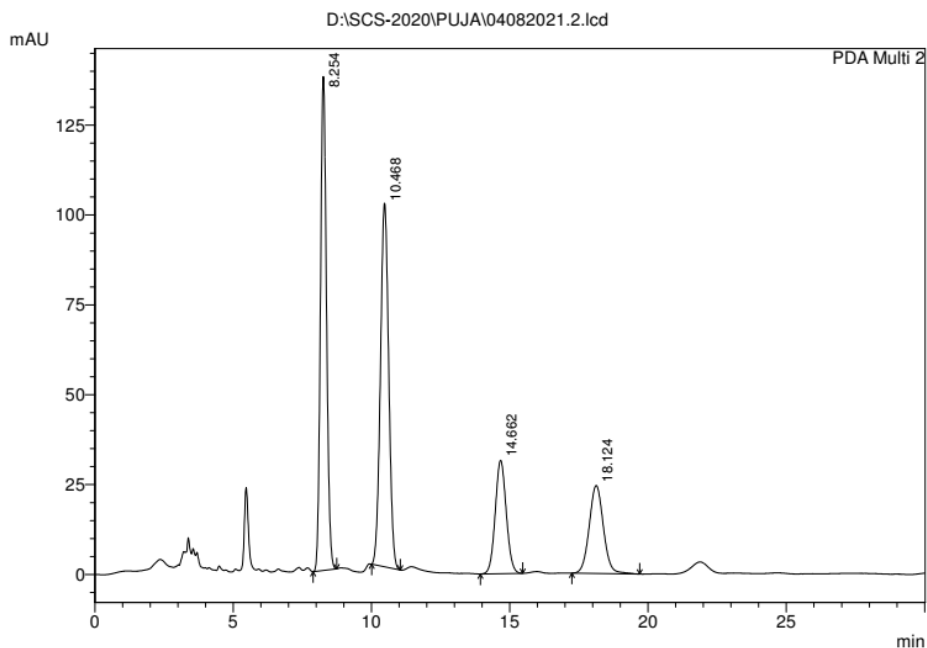

PeakTable

| Peak# | Ret. Time | Area    | Height | Area %  | Height % |
|-------|-----------|---------|--------|---------|----------|
| 1     | 8.254     | 2094499 | 137462 | 35.292  | 46.650   |
| 2     | 10.468    | 2094850 | 101168 | 35.298  | 34.333   |
| 3     | 14.662    | 870885  | 31545  | 14.674  | 10.705   |
| 4     | 18.124    | 874503  | 24492  | 14.735  | 8.312    |
| Total |           | 5934737 | 294667 | 100.000 | 100.000  |

**4.7. HPLC chromatogram of the compound 2b obtained by (R)-BINOL-derived phosphoric acid [(R)-BINOL.PA-4] at room temperature (25 °C)**

HPLC analysis conditions: CHIRALPAK IC column, 30% *i*PrOH in hexanes, flow rate 1.0 mL/min,  $\lambda = 225$  nm,  $t_r$  (diastereomer 1) = 8.233 min,  $t_r$  (diastereomer 2) = 10.465 min,  $t_r$  (diastereomer 3) = 14.719 min and  $t_r$  (diastereomer 4) = 18.224 min. The *trans/cis* ratio was determined by HPLC analysis of crude product obtained by using 2.5 mol% of [(R)-BINOL.PA-4] catalyst at room temperature (25 °C) for 24 h.

**HPLC Analysis Report**

Acquired by : Manjula  
 Sample Name : SCS-PRS-06  
 Sample ID : SCS-PRS-06  
 Tray# : 1  
 Vail # : 32  
 Injection Volume : 10 uL  
 Data File Name : 04082021.3.lcd  
 Method File Name : 04082021.lcm  
 Batch File Name :  
 Report File Name : Default.lcr  
 Data Acquired : 8/4/2021 4:03:20 PM  
 Data Processed : 8/4/2021 4:33:24 PM  
 COLUMN: CHIRALPAK IC 250X4.6mm 5u  
 MOBILE PHASE: 30% IPA IN HEXANE  
 FLOW RATE : 1ml/min

<Chromatogram>

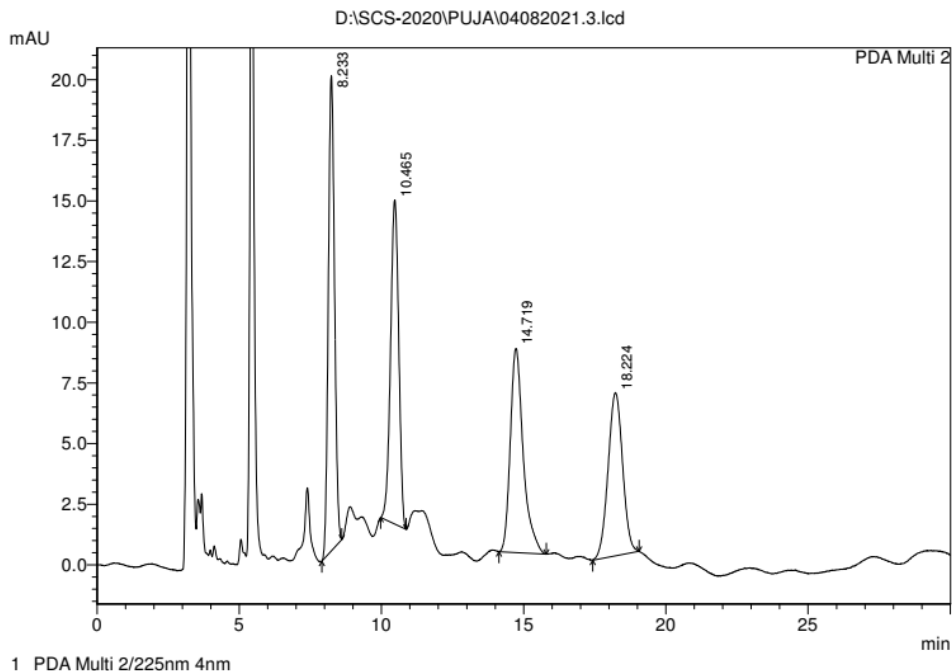

PeakTable

| Peak# | Ret. Time | Area    | Height | Area %  | Height % |
|-------|-----------|---------|--------|---------|----------|
| 1     | 8.233     | 298205  | 19592  | 27.880  | 40.734   |
| 2     | 10.465    | 266069  | 13358  | 24.875  | 27.772   |
| 3     | 14.719    | 266237  | 8416   | 24.891  | 17.499   |
| 4     | 18.224    | 239110  | 6732   | 22.355  | 13.996   |
| Total |           | 1069621 | 48097  | 100.000 | 100.000  |



#### 4.8. HPLC chromatogram of the compound 2b obtained by Ln(OTf)<sub>3</sub> and (R)-BINOL-derived phosphoric acid [(R)-BINOL.PA-3] at room temperature (25 °C)

HPLC analysis conditions: CHIRALPAK IC column, 30% *i*PrOH in hexanes, flow rate 1.0 mL/min,  $\lambda = 225$  nm,  $t_r$  (diastereomer 1) = 8.393 min,  $t_r$  (diastereomer 2) = 10.48 min,  $t_r$  (diastereomer 3) = 14.741 min and  $t_r$  (diastereomer 4) = 17.895 min. The *trans/cis* ratio was determined by HPLC analysis of crude product obtained by using a combination of Ln(OTf)<sub>3</sub> (1.0 mol%) and [(R)-BINOL.PA-3] catalyst (1 mol%) at room temperature (25 °C) for 18 h.

#### HPLC Analysis Report

Acquired by : Manjula  
Sample Name : SCS-PRS-09  
Sample ID : SCS-PRS-09  
Tray# : 1  
Vial # : 3  
Injection Volume : 5  $\mu$ L  
Data File Name : 16082021.2.lcd  
Method File Name : 16082021.lcm  
Batch File Name :  
Report File Name : Default.lcr  
Data Acquired : 8/16/2021 2:45:58 PM  
Data Processed : 8/16/2021 4:37:21 PM  
COLUMN:CHIRALPAK IC 250X4.6mm 5 $\mu$   
MOBILE PHASE: 30%IPA IN HEXANE  
FLOW RATE : 1ml/min

#### <Chromatogram>

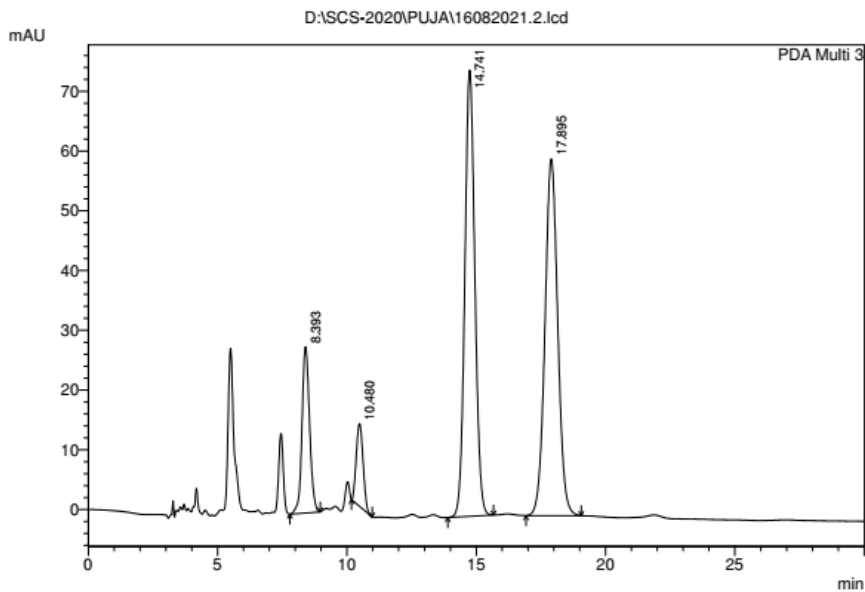

1 PDA Multi 3/254nm 4nm

PeakTable

| Peak# | Ret. Time | Area    | Height | Area %  | Height % |
|-------|-----------|---------|--------|---------|----------|
| 1     | 8.393     | 566325  | 27802  | 11.610  | 15.794   |
| 2     | 10.480    | 252861  | 13838  | 5.184   | 7.861    |
| 3     | 14.741    | 2011638 | 74678  | 41.240  | 42.424   |
| 4     | 17.895    | 2047097 | 59709  | 41.967  | 33.920   |
| Total |           | 4877920 | 176027 | 100.000 | 100.000  |

## 5. Plausible mechanism for the formation of Spirocyclopentenoneoxindole 2b

Based on the previous literature and present experimental results, we envisioned a plausible mechanistic pathway shown in Scheme S1. Hypothesized that, in the presence of acidic media the furanoxindolyl alcohol **1b** forms a highly reactive oxocarbenium ion **A** that facilitates the regiospecific addition of nucleophile to give intermediate **B** which further rearranges to intermediate **C**. Once intermediate **C** is formed, the remaining process would rely on the same principles as Piancatelli rearrangement to govern the generation of spirocyclopentenone oxindole **2b** through a Nazarov-type  $4\pi$  electrocyclization.

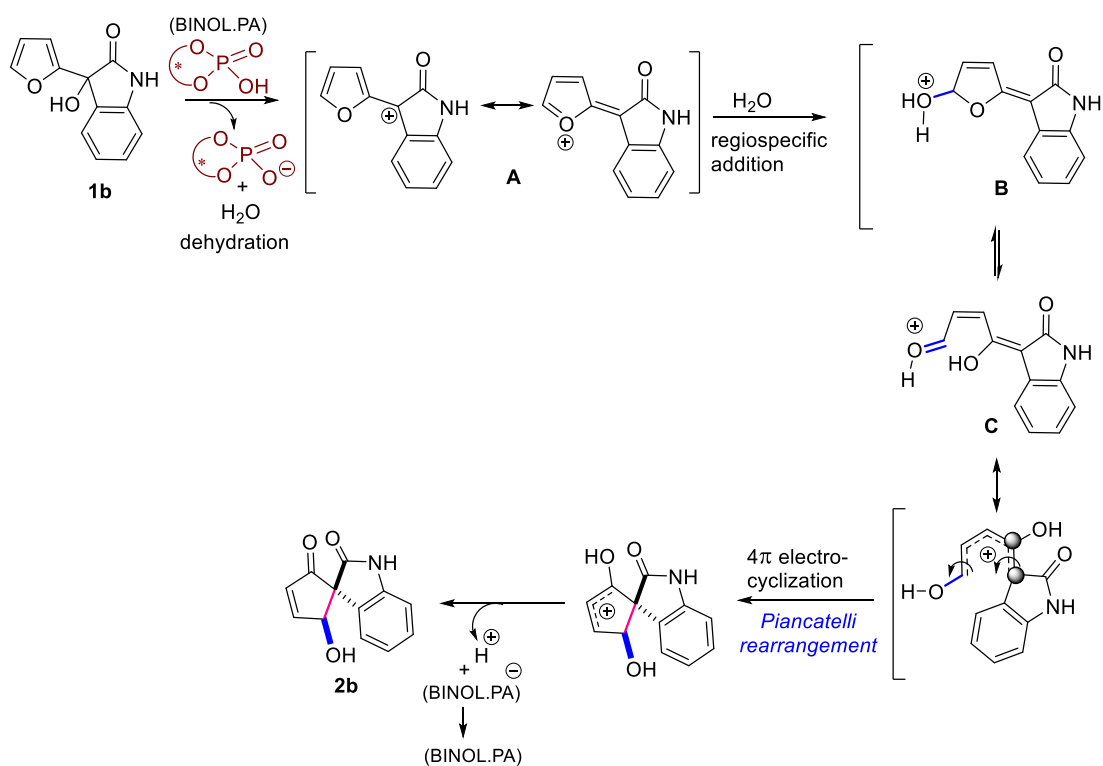

**Scheme S1** Plausible reaction pathway

## 6. X-ray Crystallographic Data of Compounds 2b, 6n and 8a

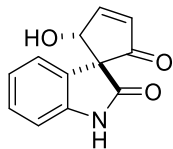

**Structure of compound 2b**

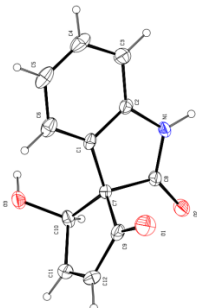

**Figure S1.** A view of **2b**, showing the atom-labelling scheme. Displacement ellipsoids are drawn at the 30% probability level and H atoms are represented by circles of arbitrary radii.

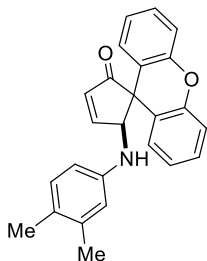

**Structure of compound 6n**

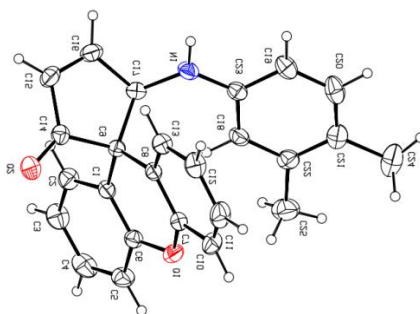

**Figure S2.** A view of **6n**, showing the atom-labelling scheme. Displacement ellipsoids are drawn at the 30% probability level and H atoms are represented by circles of arbitrary radii.

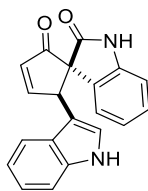

### Structure of compound 8a

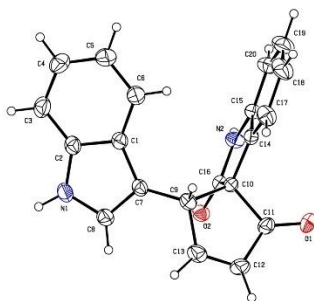

**Figure S3.** A view of **8a**, showing the atom-labelling scheme. Displacement ellipsoids are drawn at the 30% probability level and H atoms are represented by circles of arbitrary radii.

**Crystallization of 2b:** To a mixture of compound **2b** (15 mg) and dichloromethane (3 mL) in a culture vial and added five drops of hexanes and two drops of methanol. The vial was covered with perforated aluminium foil and left aside for 2 days at 25 °C for crystal growth. After slow evaporation of the solvent, pale orange crystals were obtained.

**Crystallization of 6n:** During the purification of crude compound **6n** by silica gel column chromatography using hexanes and EtOAc, compound **6n** was isolated as pale yellow crystals after the removal of solvent from the collected fractions by rotary evaporator. These crystals were directly used for X-ray structure determination.

**Crystallization of 8a:** To a mixture of compound **8a** (10 mg) and methanol (2 mL) in a culture vial. The vial was covered with perforated aluminium foil and left aside for 3 days at 25 °C for crystal growth. After slow evaporation of the solvent, brown crystals were obtained.

X-ray data for the compounds **2b**, **6n** and **8a** were collected at room temperature on a Bruker D8 QUEST instrument with an I $\mu$ S Mo micro source ( $\lambda = 0.7107$  Å) and a PHOTON-100 detector. The raw data frames were reduced and corrected for absorption effects using the Bruker Apex 3 software suite programs.<sup>1</sup> The structure was solved using intrinsic phasing method<sup>2</sup> and further refined with the SHELXL<sup>2</sup> program and expanded using Fourier techniques. Anisotropic displacement parameters were included for all non-hydrogen atoms. The N bound H atoms and O-

bound H atoms were located in the difference Fourier map and the positional parameters of H atoms were refined. All H atoms were positioned geometrically and treated as riding on their parent C atoms [C-H = 0.93-0.97 Å, and  $U_{\text{iso}}(\text{H}) = 1.5U_{\text{eq}}(\text{C})$  for methyl H or  $1.2U_{\text{eq}}(\text{C})$  for other H atoms].

### Crystal structure determination of 2b

**Crystal Data for 2b:**  $\text{C}_{12}\text{H}_9\text{NO}_3$  (M = 215.20 g/mol): orthorhombic, space group P212121 (no. 19),  $a = 7.0423(14)$  Å,  $b = 8.8382(13)$  Å,  $c = 17.048(3)$  Å,  $V = 1061.1(3)$  Å<sup>3</sup>,  $Z = 4$ ,  $T = 294.15$  K,  $\mu(\text{MoK}\alpha) = 0.098$  mm<sup>-1</sup>,  $D_{\text{calc}} = 1.347$  g/cm<sup>3</sup>, 10127 reflections measured ( $5.192^\circ \leq 2\theta \leq 53.186^\circ$ ), 2198 unique ( $R_{\text{int}} = 0.0780$ ,  $R_{\text{sigma}} = 0.0675$ ) which were used in all calculations. The final  $R_1$  was 0.0636 ( $I > 2\sigma(I)$ ) and  $wR_2$  was 0.1375 (all data). CCDC **2104599** contains supplementary Crystallographic data for the structure.

### Crystal structure determination of 6n

**Crystal Data for 6n:**  $\text{C}_{25}\text{H}_{21}\text{NO}_2$  (M = 367.43 g/mol): monoclinic, space group P21/n (no. 14),  $a = 12.2675(6)$  Å,  $b = 11.9199(7)$  Å,  $c = 12.9994(7)$  Å,  $\beta = 94.172(3)^\circ$ ,  $V = 1895.83(18)$  Å<sup>3</sup>,  $Z = 4$ ,  $T = 294.15$  K,  $\mu(\text{MoK}\alpha) = 0.081$  mm<sup>-1</sup>,  $D_{\text{calc}} = 1.287$  g/cm<sup>3</sup>, 40343 reflections measured ( $4.408^\circ \leq 2\theta \leq 56.656^\circ$ ), 4669 unique ( $R_{\text{int}} = 0.0724$ ,  $R_{\text{sigma}} = 0.0384$ ) which were used in all calculations. The final  $R_1$  was 0.0532 ( $I > 2\sigma(I)$ ) and  $wR_2$  was 0.1453 (all data). CCDC **2104600** contains supplementary Crystallographic data for the structure.

### Crystal structure determination of 8a

**Crystal Data for 8a:**  $\text{C}_{20}\text{H}_{14}\text{N}_2\text{O}_2$  (M = 314.33 g/mol): triclinic, space group P-1 (no. 2),  $a = 6.5740(7)$  Å,  $b = 8.6042(6)$  Å,  $c = 14.8471(8)$  Å,  $\alpha = 102.836(3)^\circ$ ,  $\beta = 101.585(8)^\circ$ ,  $\gamma = 99.182(9)^\circ$ ,  $V = 783.60(11)$  Å<sup>3</sup>,  $Z = 2$ ,  $T = 294.15$  K,  $\mu(\text{MoK}\alpha) = 0.088$  mm<sup>-1</sup>,  $D_{\text{calc}} = 1.332$  g/cm<sup>3</sup>, 10367 reflections measured ( $4.97^\circ \leq 2\theta \leq 52.776^\circ$ ), 3214 unique ( $R_{\text{int}} = 0.0797$ ,  $R_{\text{sigma}} = 0.0750$ ) which were used in all calculations. The final  $R_1$  was 0.0451 ( $I > 2\sigma(I)$ ) and  $wR_2$  was 0.1393 (all data). CCDC **2104601** contains supplementary Crystallographic data for the structure. These data can be obtained free of charge at [ww.ccdc.cam.ac.uk/conts/retrieving.html](http://ww.ccdc.cam.ac.uk/conts/retrieving.html) [or from the Cambridge Crystallographic Data Centre (CCDC), 12 Union Road, Cambridge CB2 1EZ, UK; fax: +44(0) 1223 336 033; email: [deposit@ccdc.cam.ac.uk](mailto:deposit@ccdc.cam.ac.uk)].

1. Bruker (2016). APEX3, SAINT and SADABS. Bruker AXS, Inc., Madison, Wisconsin, USA.
2. Sheldrick G. M. (2015) ActaCrystallogrC71:3-8.

## 7. References

1. Liu, Y.; Sun, Z.; Li, S.; Xiang, K.; Zhang, Y.; Li, Y. *RSC Adv.* **2016**, *6*, 26954–26958.
2. Li, H.; Tong, R.; Sun, J. *Angew. Chem., Int. Ed.* **2016**, *55*, 15125–15128.
